# Supplementary material for: Workplace violence, bullying, burnout, job satisfaction and their correlation with depression among Bangladeshi nurses: A cross-sectional survey during the COVID-19 pandemic
Source: PLoS One. 2022 Sep 22;17(9):e0274965. doi: 10.1371/journal.pone.0274965 (PMC9499253; doi:10.1371/journal.pone.0274965)
Supplement: S1 Data — (XLS) [file pone.0274965.s001.xls]

## Sheet: Sheet1
Sex	Age_cont	Age_group	Marital_status	Educational_level	Monthly_salary	Type_of_job	Level_of_hospital	Work_department	Weekly_working_hours	Years_of_experience	Sufficient_equipment	Timely_payment_salary	Have_rewards	Training_against_wpv	violence_1	violence_2	violence_3	violence_4	violence_5	snaq_1	snaq_2	snaq_3	snaq_4	snaq_5	snaq_6	snaq_7	snaq_8	snaq_9	bms_1	bms_2	bms_3	bms_4	bms_5	bms_6	bms_7	bms_8	bms_9	bms_10	phq_1	phq_2	phq_3	phq_4	phq_5	phq_6	phq_7	phq_8	phq_9	sijs_1	sijs_2
Female	25	25-29 yr	unmarried	Master's degree or above	>29,999	Private	Tertiary	criti	37-48 hours	<3 years	No	Yes	Yes	Yes	1	0	1	0	0	1	1	1	1	1	1	2	2	1	4	3	1	1	3	1	4	1	7	3	3	3	3	3	0	0	0	0	0	5	5
Female	29.2	25-29 yr	married	Diploma degree	>29,999	Govt	Tertiary	surg	<37 hours	>5 years	No	Yes	Yes	No	0	2	0	0	0	2	3	2	3	3	4	4	4	2	3	3	3	1	3	4	1	1	1	2	1	1	1	0	0	1	0	1	1	4	4
Female	31	>29 yr	married	Diploma degree	21,000-29,999	Govt	Tertiary	med	37-48 hours	>5 years	No	Yes	No	No	0	1	0	0	0	2	1	1	1	1	1	2	1	1	5	3	4	1	4	4	4	3	4	3	3	0	0	1	0	0	0	0	0	5	5
Female	41.4	>29 yr	married	Master's degree or above	>29,999	Govt	Tertiary	criti	<37 hours	>5 years	Yes	Yes	No	No	0	0	0	0	0	1	1	1	1	1	1	1	1	1	3	1	3	1	1	3	3	1	1	1	3	0	0	0	0	0	0	0	0	5	5
Female	24.3	<25 yr	unmarried	Diploma degree	<21,000	Private	Tertiary	med	>48 hours	<3 years	Yes	No	No	No	3	3	3	3	0	5	5	5	5	2	5	5	5	5	1	4	4	1	7	7	4	7	7	1	3	3	3	3	3	0	0	0	3	1	3
Female	27	25-29 yr	married	Diploma degree	21,000-29,999	Private	Tertiary	med	37-48 hours	3-5 years	Yes	Yes	No	Yes	0	0	0	0	0	4	1	1	1	2	2	4	2	3	4	3	3	1	3	4	4	4	3	1	3	1	3	0	3	0	0	0	0	5	5
Female	23.8	<25 yr	unmarried	Diploma degree	<21,000	Private	Primary	med	37-48 hours	<3 years	Yes	No	No	No	0	2	0	0	0	1	1	1	1	1	2	2	2	1	4	3	3	1	1	6	4	1	6	4	3	0	3	0	3	2	0	0	3	3	5
Female	24	<25 yr	unmarried	Diploma degree	<21,000	Private	Secondary	gyn	<37 hours	<3 years	No	No	No	No	0	2	0	2	0	5	2	3	2	5	5	2	5	5	7	4	5	5	7	7	4	4	7	1	3	2	1	2	0	3	3	0	1	2	4
Female	24	<25 yr	unmarried	Bachelor's degree	<21,000	Private	Tertiary	criti	37-48 hours	<3 years	Yes	Yes	No	No	0	3	0	0	0	2	2	1	1	5	5	3	3	5	3	7	7	5	4	7	4	7	5	7	1	1	2	2	2	2	1	0	1	4	2
Female	27.2	25-29 yr	married	Bachelor's degree	21,000-29,999	Govt	Tertiary	surg	<37 hours	3-5 years	No	Yes	Yes	No	0	1	1	0	0	2	2	2	1	2	2	1	2	2	2	2	3	3	3	3	2	2	2	3	1	1	0	0	0	0	1	1	1	3	3
Female	23	<25 yr	married	Bachelor's degree	<21,000	Govt	Tertiary	criti	37-48 hours	3-5 years	Yes	Yes	No	No	0	3	1	0	0	1	1	1	2	2	2	2	1	2	4	7	7	2	4	4	4	3	4	2	3	3	1	2	3	3	2	3	0	3	5
Female	24.4	<25 yr	unmarried	Bachelor's degree	<21,000	Private	Secondary	criti	<37 hours	<3 years	No	Yes	No	No	0	1	1	1	0	2	1	1	1	1	2	2	2	1	4	3	3	3	3	3	4	3	4	1	2	1	1	1	1	1	1	1	2	3	3
Female	25	25-29 yr	unmarried	Bachelor's degree	21,000-29,999	Govt	Secondary	med	37-48 hours	3-5 years	No	Yes	No	No	1	3	3	0	0	5	5	5	2	3	4	4	4	2	3	4	4	5	3	2	3	1	4	2	1	2	3	1	2	1	1	1	1	3	3
Female	25.7	25-29 yr	married	Diploma degree	<21,000	Private	Tertiary	criti	>48 hours	3-5 years	No	Yes	No	No	2	2	0	0	0	2	1	2	1	1	2	2	2	1	5	4	4	4	5	7	4	4	5	4	2	2	2	2	1	2	2	2	2	2	3
Female	31	>29 yr	married	Bachelor's degree	>29,999	Govt	Tertiary	criti	37-48 hours	>5 years	Yes	Yes	No	No	3	1	1	0	0	2	2	2	2	1	2	1	2	1	4	1	4	1	3	3	4	7	7	1	3	3	0	1	1	3	0	0	0	4	4
Female	38.2	>29 yr	married	Diploma degree	>29,999	Govt	Tertiary	surg	<37 hours	>5 years	No	Yes	Yes	No	0	2	2	2	0	2	4	3	4	2	4	2	4	2	5	5	5	3	5	5	2	5	6	3	1	1	1	1	1	1	1	1	1	4	4
Female	30	>29 yr	married	Bachelor's degree	>29,999	Govt	Tertiary	general	<37 hours	>5 years	No	Yes	No	No	1	2	0	0	0	2	2	1	3	2	2	2	2	1	4	2	3	2	3	2	3	2	3	2	1	0	1	1	1	0	1	1	1	5	4
Female	32	>29 yr	married	Master's degree or above	21,000-29,999	Govt	Tertiary	surg	<37 hours	<3 years	Yes	Yes	Yes	Yes	0	1	0	1	0	2	3	3	5	2	4	4	1	2	5	6	6	4	4	4	4	5	5	5	1	3	1	3	3	3	3	3	1	3	3
Female	33	>29 yr	married	Diploma degree	>29,999	Govt	Tertiary	general	<37 hours	>5 years	No	Yes	No	No	0	3	1	0	0	2	2	1	4	3	2	3	4	2	1	1	1	1	2	2	2	1	3	1	3	0	1	2	1	0	0	1	0	5	5
Female	33	>29 yr	married	Master's degree or above	21,000-29,999	Govt	Tertiary	med	<37 hours	>5 years	Yes	Yes	Yes	No	0	0	0	0	0	1	1	1	1	1	1	1	1	1	1	1	1	1	1	1	1	1	1	1	3	0	0	0	0	0	0	0	0	5	5
Female	30	>29 yr	married	Diploma degree	21,000-29,999	Govt	Secondary	general	37-48 hours	>5 years	No	Yes	No	No	1	0	1	0	0	1	3	1	1	1	1	2	1	1	3	1	1	1	1	1	2	1	4	2	3	0	3	1	0	0	0	0	0	5	5
Female	23	<25 yr	married	Diploma degree	<21,000	Private	Secondary	criti	<37 hours	<3 years	Yes	Yes	No	Yes	2	1	0	0	0	2	2	2	5	5	5	2	5	2	7	5	4	2	4	4	4	5	7	3	1	3	0	3	0	3	2	3	0	2	1
Female	23.4	<25 yr	unmarried	Diploma degree	<21,000	Private	Tertiary	criti	<37 hours	<3 years	Yes	Yes	No	Yes	0	1	0	0	0	2	1	1	1	2	2	2	1	2	1	1	1	1	2	1	1	1	1	1	3	0	1	2	2	0	0	1	0	3	1
Female	25	25-29 yr	married	Diploma degree	<21,000	Private	Primary	em	37-48 hours	3-5 years	No	Yes	No	No	0	3	0	0	0	1	2	2	2	2	2	2	2	1	1	1	1	1	1	1	3	1	1	1	2	0	2	3	0	0	0	0	0	4	4
Female	36	>29 yr	married	Bachelor's degree	>29,999	Govt	Tertiary	med	<37 hours	>5 years	No	Yes	No	No	0	1	0	0	0	2	2	1	2	2	3	2	3	2	3	3	3	3	3	4	4	4	3	3	1	2	2	1	1	2	1	1	1	3	3
Female	28	25-29 yr	unmarried	Diploma degree	21,000-29,999	Govt	Primary	med	<37 hours	>5 years	Yes	Yes	Yes	No	0	0	0	0	0	1	1	1	1	1	1	1	1	1	1	1	1	1	1	1	1	1	1	1	3	0	0	0	0	0	0	0	0	5	5
Female	30	>29 yr	married	Bachelor's degree	>29,999	Govt	Tertiary	criti	<37 hours	3-5 years	No	Yes	No	No	1	1	0	0	0	2	2	2	2	2	2	2	2	2	5	3	4	2	2	2	4	2	3	3	1	1	2	2	1	1	1	1	1	2	4
Female	27.8	25-29 yr	married	Diploma degree	>29,999	Govt	Primary	med	<37 hours	<3 years	Yes	Yes	Yes	Yes	0	1	0	0	0	1	1	1	1	1	1	1	1	1	4	4	1	1	1	1	2	4	4	1	3	0	0	2	0	0	0	0	0	5	5
Female	22.2	<25 yr	unmarried	Diploma degree	<21,000	Private	Tertiary	med	37-48 hours	<3 years	Yes	Yes	No	No	0	0	0	0	0	1	1	1	1	1	1	2	1	1	2	2	1	1	2	2	1	1	1	1
Female	32.4	>29 yr	married	Bachelor's degree	>29,999	Govt	Tertiary	surg	<37 hours	>5 years	No	Yes	No	No	0	1	0	0	0	2	2	2	3	2	3	3	4	2	4	4	3	3	3	4	4	4	4	4	1	1	0	1	0	1	0	1	2	3	4
Female	48	>29 yr	married	Diploma degree	>29,999	Govt	Tertiary	med	37-48 hours	>5 years	No	No	Yes	No	0	1	0	0	0	2	2	3	1	2	3	3	3	3	3	4	4	1	4	4	4	4	4	1	1	2	0	0	0	0	0	0	0	3	4
Female	27	25-29 yr	married	Diploma degree	21,000-29,999	Govt	Tertiary	med	37-48 hours	<3 years	No	Yes	No	No	0	1	0	0	0	1	1	1	1	1	1	1	1	1	1	6	3	4	1	3	2	1	7	1	1	1	1	1	0	1	1	1	0	3	4
Female	54	>29 yr	married	Master's degree or above	>29,999	Govt	Tertiary	em	37-48 hours	>5 years	Yes	Yes	No	No	1	0	0	0	0	3	3	3	5	4	4	1	2	1	7	7	4	4	2	3	1	3	3	2	3	2	1	1	2	1	1	1	2	3	4
Female	35.2	>29 yr	married	Bachelor's degree	>29,999	Govt	Tertiary	surg	<37 hours	>5 years	No	Yes	No	No	0	2	0	0	0	2	2	1	2	2	2	1	3	1	3	3	3	3	3	4	2	2	2	3	2	1	1	0	0	1	0	1	1	4	3
Female	32	>29 yr	married	Master's degree or above	21,000-29,999	Govt	Tertiary	med	<37 hours	<3 years	No	Yes	No	No	0	0	0	0	0	5	2	2	2	5	5	5	2	2	6	7	7	3	7	7	3	7	7	5	2	2	1	2	2	3	3	3	3	3	3
Female	25	25-29 yr	unmarried	Diploma degree	<21,000	Private	Secondary	general	>48 hours	<3 years	Yes	No	No	No	0	3	1	0	0	4	3	2	1	2	2	2	2	1	5	4	5	2	6	6	4	5	5	7	0	3	3	3	1	3	3	1	1	5	1
Female	21.5	<25 yr	unmarried	Diploma degree	<21,000	Private	Secondary	general	<37 hours	<3 years	Yes	Yes	No	No	0	0	0	0	0	1	1	1	1	1	2	1	2	1	3	1	1	2	1	1	1	1	1	1	3	0	0	0	0	0	0	0	0	3	1
Female	34	>29 yr	married	Bachelor's degree	>29,999	Govt	Tertiary	surg	<37 hours	>5 years	No	Yes	Yes	No	0	3	2	1	0	2	2	2	2	1	2	2	2	2	3	3	3	3	3	3	2	2	2	2	1	1	1	1	0	0	0	0	1	4	4
Female	36	>29 yr	married	Diploma degree	21,000-29,999	Govt	Secondary	med	<37 hours	>5 years	No	Yes	No	No	0	3	2	0	0	1	1	1	1	1	1	1	1	1	4	3	3	1	4	3	4	1	4	1	0	0	0	1	0	0	0	0	0	2	4
Female	25.9	25-29 yr	unmarried	Diploma degree	<21,000	Private	Primary	med	>48 hours	3-5 years	Yes	Yes	No	Yes	0	1	0	0	0	1	1	1	1	1	1	1	1	1	3	1	1	1	1	1	3	1	3	1	3	0	0	0	0	1	0	0	0	5	5
Female	36.4	>29 yr	married	Bachelor's degree	>29,999	Govt	Tertiary	med	37-48 hours	>5 years	No	Yes	No	No	0	3	0	0	0	5	3	2	5	2	1	2	5	5	4	5	4	1	3	3	1	3	1	1	3	0	0	1	0	0	0	0	0	4	5
Female	33	>29 yr	married	Diploma degree	21,000-29,999	Govt	Primary	criti	>48 hours	>5 years	No	Yes	No	No	0	0	0	0	0	1	1	1	1	2	1	1	1	1	1	1	1	1	4	1	1	1	4	1	3	0	0	0	0	0	0	1	0	5	5
Female	23.4	<25 yr	unmarried	Diploma degree	<21,000	Private	Secondary	gyn	37-48 hours	<3 years	Yes	Yes	No	No	0	0	0	0	0	1	1	1	1	1	1	1	1	1	4	3	4	1	4	4	3	1	1	1	3	0	0	0	3	3	0	0	0	4	4
Female	26.5	25-29 yr	unmarried	Bachelor's degree	21,000-29,999	Govt	Tertiary	surg	<37 hours	3-5 years	No	Yes	No	No	0	1	0	1	1	2	2	2	1	2	1	2	2	2	3	5	4	1	4	5	3	2	3	1	3	1	1	1	1	3	2	1	3	4	4
Female	29	25-29 yr	unmarried	Master's degree or above	21,000-29,999	Govt	Tertiary	em	<37 hours	>5 years	No	Yes	Yes	No	0	3	2	2	0	2	2	2	2	2	5	2	2	2	4	3	3	4	4	3	3	3	6	4	2	1	0	1	0	1	0	0	0	3	4
Female	26.5	25-29 yr	married	Diploma degree	21,000-29,999	Govt	Tertiary	general	37-48 hours	>5 years	Yes	Yes	No	No	0	0	0	0	0	1	1	1	1	1	2	1	2	1	1	2	1	1	1	1	1	1	1	1	3	0	0	0	1	0	0	0	0	5	5
Female	44	>29 yr	married	Master's degree or above	>29,999	Govt	Tertiary	med	<37 hours	>5 years	No	Yes	No	No	0	3	3	0	0	2	5	3	5	5	5	5	5	5	7	7	5	3	4	5	4	3	4	5	3	2	1	1	1	3	0	3	3	2	3
Female	24	<25 yr	unmarried	Diploma degree	<21,000	Private	Primary	general	>48 hours	<3 years	Yes	Yes	No	No	0	0	0	0	0	1	1	3	4	1	1	1	1	1	5	1	4	1	4	4	4	4	1	1	3	0	0	1	0	3	0	3	0	1	1
Female	24	<25 yr	unmarried	Diploma degree	<21,000	Private	Tertiary	med	37-48 hours	3-5 years	Yes	Yes	No	No	3	0	0	0	0	1	1	1	1	1	2	1	2	1	1	3	1	1	3	1	3	1	4	2	3	0	1	0	0	0	0	1	0	4	4
Female	23.6	<25 yr	married	Bachelor's degree	<21,000	Private	Secondary	med	>48 hours	<3 years	No	Yes	No	No	0	3	0	2	0	1	1	1	1	3	2	2	4	5	6	3	4	1	4	4	3	4	7	4	1	3	3	2	0	1	0	1	0	4	4
Female	25.5	25-29 yr	married	Diploma degree	>29,999	Private	Secondary	med	37-48 hours	3-5 years	No	Yes	No	No	0	0	0	1	0	1	2	1	2	1	1	1	1	1	3	4	3	1	2	2	3	1	2	1	3	0	2	0	1	0	0	0	0	3	3
Female	29	25-29 yr	unmarried	Diploma degree	21,000-29,999	Govt	Tertiary	criti	37-48 hours	>5 years	No	Yes	No	No	2	3	3	0	0	2	2	2	2	3	2	2	2	2	7	3	4	3	7	7	5	7	7	4	1	3	1	1	1	3	0	0	3	3	3
Female	23	<25 yr	unmarried	Diploma degree	<21,000	Private	Tertiary	surg	>48 hours	<3 years	Yes	Yes	No	No	0	0	0	0	0	1	1	1	1	1	1	2	1	1	2	2	2	2	1	3	1	1	2	2	1	1	1	1	2	1	1	2	1	4	4
Female	25	25-29 yr	married	Diploma degree	<21,000	Private	Tertiary	criti	<37 hours	3-5 years	No	Yes	No	No	0	0	0	0	1	2	2	2	2	5	3	2	2	1	7	7	7	2	3	3	5	7	7	3	2	2	1	3	0	1	3	0	0	3	1
Female	25	25-29 yr	unmarried	Master's degree or above	21,000-29,999	Private	Tertiary	general	37-48 hours	<3 years	Yes	Yes	No	Yes	0	1	0	0	0	1	1	1	1	1	1	2	1	1	4	2	3	1	2	4	3	3	4	2	2	1	1	1	1	0	0	0	1	4	4
Female	39	>29 yr	married	Master's degree or above	>29,999	Govt	Tertiary	surg	37-48 hours	>5 years	No	Yes	No	No	0	3	0	0	0	4	2	5	1	2	2	2	2	1	4	3	5	1	4	3	2	2	4	2	3	1	1	1	1	1	1	0	1	4	4
Female	24	<25 yr	married	Master's degree or above	21,000-29,999	Govt	Tertiary	general	<37 hours	<3 years	No	Yes	No	No	0	1	0	0	0	2	2	1	1	2	2	2	1	1	2	3	3	2	4	4	3	3	2	2	1	2	1	0	1	0	1	1	2	3	2
Female	33	>29 yr	married	Bachelor's degree	21,000-29,999	Govt	Primary	med	37-48 hours	>5 years	No	Yes	No	No	0	3	1	0	0	2	2	2	2	1	1	4	2	5	5	4	4	1	6	5	3	2	5	1	3	1	1	0	0	0	3	0	0	3	4
Female	23	<25 yr	unmarried	Diploma degree	<21,000	Private	Tertiary	gyn	37-48 hours	<3 years	No	Yes	No	No	0	3	0	0	0	1	1	1	1	1	1	2	2	1	7	1	1	1	1	1	1	1	1	1	3	0	0	0	0	0	0	0	0	5	5
Female	23.8	<25 yr	unmarried	Diploma degree	<21,000	Private	Secondary	surg	37-48 hours	<3 years	Yes	No	No	No	0	3	3	0	0	2	3	2	1	2	3	2	3	1	5	7	7	1	7	7	1	7	7	1	3	3	1	0	0	3	3	0	3	1	4
Female	29	25-29 yr	married	Diploma degree	21,000-29,999	Govt	Tertiary	med	37-48 hours	3-5 years	No	Yes	No	No	0	3	0	0	0	1	1	1	1	1	1	1	3	1	1	4	3	1	1	2	2	1	7	1	1	1	1	1	0	1	1	0	0	5	4
Female	22	<25 yr	unmarried	Diploma degree		Private	Secondary	criti	<37 hours	<3 years	Yes	Yes	Yes	Yes	0	0	0	0	0	1	1	1	1	1	1	1	1	1	5	3	4	2	3	3	3	2	1	4	3	1	0	0	0	1	0	0	0	3	4
Female	26	25-29 yr	unmarried	Diploma degree	<21,000	Private	Secondary	general	37-48 hours	3-5 years	Yes	Yes	No	No	0	0	0	0	0	1	1	1	1	1	1	1	1	1	3	2	2	1	1	1	1	1	5	1	1	0	1	1	1	0	0	0	0	4	4
Female	24	<25 yr	unmarried	Diploma degree	<21,000	Private	Secondary	gyn	37-48 hours	3-5 years	Yes	No	No	No	0	0	2	0	1	4	3	2	2	4	3	3	2	4	7	5	4	4	7	5	6	2	6	7	3	3	0	2	1	2	2	2	2	1	5
Female	32	>29 yr	unmarried	Master's degree or above	21,000-29,999	Govt	Tertiary	surg	37-48 hours	>5 years	Yes	Yes	No	Yes	1	1	0	1	0	3	2	1	2	1	2	1	2	1	4	4	3	1	4	4	1	4	6	1	2	0	3	0	0	0	0	0	0	4	3
Female	27	25-29 yr	unmarried	Diploma degree	21,000-29,999	Govt	Tertiary	surg	<37 hours	3-5 years	No	Yes	No	No	1	0	0	0	0	2	2	2	2	2	2				4	3	3	1	2	3	3	3	3	3	1	1	0	0	0	0	0	0	0	5	5
Female	30.2	>29 yr	married	Bachelor's degree	>29,999	Govt	Tertiary	surg	<37 hours	>5 years	No	Yes	Yes	No	0	2	1	0	0	2	2	3	4	2	4	4	4	2	3	3	3	3	3	4	1	3	2	3	1	1	2	0	1	1	0	1	1	3	3
Female	32.7	>29 yr	married	Bachelor's degree	>29,999	Govt	Tertiary	surg	<37 hours	>5 years	No	Yes	No	No	0	1	0	0	0	2	2	2	3	1	2	2	3	2	2	3	4	4	3	3	3	3	4	3	1	1	1	1	1	1	1	1	1	3	3
Female	25.4	25-29 yr	married	Diploma degree	<21,000	Private	Tertiary	general	<37 hours	3-5 years	No	No	No	No	0	0	0	0	0	2	2	2	2	2	2	2	2	2	5	3	4	3	4	4	4	3	6	5	1	2	1	1	1	0	0	0	1	1	1
Female	28	25-29 yr	unmarried	Diploma degree	21,000-29,999	Private	Tertiary	criti	37-48 hours	3-5 years	Yes	Yes	No	No	0	3	1	0	0	3	3	3	4	5	2	2	3	3	6	6	6	6	6	6	6	7	5	6	1	3	2	2	2	3	2	0	2	2	3
Female	24	<25 yr	married	Bachelor's degree		Private	Secondary	med	37-48 hours	<3 years	No	Yes	No	No	0	3	0	0	0	2	1	2	1	2	2	1	1	1	6	4	4	4	4	4	6	6	6	2	3	1	2	2	1	1	1	1	2	3	4
Female	26.2	25-29 yr	unmarried	Bachelor's degree	<21,000	Private	Tertiary	surg	37-48 hours	<3 years	Yes	Yes	No	No	0	1	0	0	0	2	2	3	2	2	5	2	5	2	5	4	4	2	5	5	5	5	5	7	2	1	1	1	1	1	3	1	1	5	2
Female	40	>29 yr	married	Bachelor's degree	>29,999	Govt	Tertiary	gyn	37-48 hours	>5 years	Yes	Yes	No	No	0	3	0	0	0	2	2	2	2	2	1	2	2	2	1	1	1	1	7	7	1	1	7	1	3	0	0	0	0	3	0	0	0	5	5
Female	36	>29 yr	married	Diploma degree	21,000-29,999	Govt	Tertiary	criti	37-48 hours	>5 years	No	Yes	No	No	0	0	0	0	0	5	5	5	5	5	5	5	5	5	1	1	1	1	1	1	1	1	1	1	0	3	0	0	0	0	0	0	0	1	1
Female	28.6	25-29 yr	married	Diploma degree	21,000-29,999	Govt	Tertiary	med	37-48 hours	<3 years	Yes	Yes	No	No	0	0	0	0	0	2	1	2	1	1	1	2	2	1	2	1	1	1	2	2	2	1	1	1	1	1	1	1	1	0	1	0	0	4	4
Female	33	>29 yr	unmarried	Bachelor's degree	21,000-29,999	Govt	Primary	general	<37 hours	>5 years	No	Yes	No	No	0	1	0	1	0	1	2	2	2	2	1	2	2	2	4	3	3	2	1	3	3	3	3	3	1	2	2	0	0	2	0	0	0	3	3
Female	21.5	<25 yr	unmarried	Diploma degree	<21,000	Private	Secondary	surg	<37 hours	<3 years	No	Yes	No	No	0	1	1	0	1	2	2	1	1	1	1	1	2	2	4	4	4	1	4	3	3	3	4	1	1	1	0	0	1	0	1	1	1	4	4
Female	30.2	>29 yr	married	Bachelor's degree	<21,000	Govt	Primary	general	37-48 hours	<3 years	Yes	Yes	No	No	0	2	3	0	0	1	1	2	1	4	2	2	2	1	1	1	7	1	1	1	1	1	1	1	3	0	0	0	0	0	0	0	0	5	5
Female	27	25-29 yr	married	Bachelor's degree	21,000-29,999	Govt	Tertiary	med	<37 hours	3-5 years	No	Yes	No	No	0	3	3	2	0	2	2	2	2	2	2	2	2	2	6	4	4	4	4	4	4	4	3	2	3	2	2	1	1	1	1	1	1	2	4
Female	31.2	>29 yr	married	Master's degree or above	21,000-29,999	Govt	Tertiary	general	>48 hours	>5 years	No	Yes	Yes	No	1	2	0	0	0	1	3	2	1	3	5	5	5	3	5	3	4	3	5	4	4	3	4	3	1	2	2	1	2	0	0	0	0	5	5
Female	34	>29 yr	married	Master's degree or above	>29,999	Govt	Secondary	em	<37 hours	>5 years	Yes	Yes	No	No	0	3	2	0	0	2	2	2	2	2	2	2	2	2	5	6	6	4	6	6	5	4	5	5	2	2	3	3	3	3	2	2	2	3	3
Female	30.2	>29 yr	married	Master's degree or above	21,000-29,999	Govt	Tertiary	criti	37-48 hours	>5 years	Yes	Yes	Yes	Yes	0	0	3	0	0	1	1	1	1	1	1	1	1	1	3	4	1	1	4	2	1	1	4	1	3	0	0	0	0	0	0	0	0	4	3
Female	25	25-29 yr	unmarried	Bachelor's degree	21,000-29,999	Private	Tertiary	criti	>48 hours	<3 years	Yes	Yes	No	No	0	1	0	0	0	1	1	2	1	2	2	2	2	2	4	4	4	3	4	5	4	4	4	4	2	2	2	1	2	1	2	1	1	4	4
Female	22	<25 yr	unmarried	Diploma degree	<21,000	Private	Tertiary	criti	37-48 hours	<3 years	No	Yes	No	No	0	2	0	2	1	1	2	3	2	4	5	2	3	2	3	4	7	1	4	7	5	5	3	1	3	2	0	1	1	2	2	2	0	2	3
Female	23	<25 yr	unmarried	Diploma degree	21,000-29,999	Private	Primary	em	37-48 hours	<3 years	No	No	No	No	0	3	0	0	0	2	5	5	5	2	2	5	5	5	5	6	6	3	5	7	5	4	3	6	1	3	3	2	1	1	0	0	1	2	2
Female	26.4	25-29 yr	married	Bachelor's degree	21,000-29,999	Govt	Tertiary	surg	<37 hours	3-5 years	Yes	Yes	Yes	Yes	0	0	0	0	0	1	1	2	1	1	1	1	1	1	3	1	1	1	1	1	3	1	2	1	3	0	0	0	0	0	0	0	0	5	5
Female	30	>29 yr	married	Bachelor's degree	>29,999	Govt	Tertiary	med	37-48 hours	>5 years	No	Yes	No	No	1	2	0	0	0	2	2	1	1	2	2	2	2	1	4	2	3	2	3	2	3	2	3	2	1	0	1	1	1	0	1	1	1	5	4
Female	24	<25 yr	unmarried	Bachelor's degree	<21,000	Private	Secondary	criti	<37 hours	<3 years	No	Yes	No	No	0	1	0	0	0	2	2	2	2	3	4	2	1	1	1	1	1	4	4	1	4	1	1	1	3	1	1	1	0	1	0	0	0	4	2
Female	35	>29 yr	married	Bachelor's degree	>29,999	Govt	Tertiary	surg	37-48 hours	>5 years	Yes	Yes	No	No	1	0	0	1	1	3	3	4	4	4	3	1	2	2	3	3	4	4	4	1	2	3	4	3	3	2	1	0	0	0	0	0	0	4	3
Female	27	25-29 yr	married	Bachelor's degree	21,000-29,999	Govt	Tertiary	general	<37 hours	3-5 years	No	No	Yes	No	0	1	0	0	0	2	1	2	1	1	2	2	2	2	4	4	4	4	4	4	3	3	4	4	3	1	1	1	3	3	3	0	1	5	3
Female	26.4	25-29 yr	married	Diploma degree	>29,999	Govt	Tertiary	surg	<37 hours	3-5 years	No	Yes	No	No	0	2	2	0	0	3	2	4	5	4	5	5	5	2	4	4	5	4	4	4	1	2	2	3	2	1	2	2	1	1	1	2	2	4	3
Female	25.3	25-29 yr	unmarried	Diploma degree	<21,000	Govt	Primary	med	<37 hours	>5 years	Yes	Yes	Yes	No	0	0	0	0	1	1	2	1	1	1	2	1	1	2	3	3	3	2	4	4	1	1	1	1	3	1	0	0	0	1	0	0	1	5	5
Female	25	25-29 yr	unmarried	Diploma degree	>29,999	Govt	Tertiary	criti	>48 hours	3-5 years	No	Yes	No	No	0	0	1	0	0	1	1	1	2	2	3	2	1	5	6	4	4	1	3	5	6	3	2	4	1	1	3	1	3	2	3	0	0	5	3
Female	26	25-29 yr	married	Bachelor's degree	21,000-29,999	Govt	Primary	med	37-48 hours	3-5 years	Yes	Yes	No	No	0	3	3	0	0	2	2	2	2	2	2	2	2	2	4	4	4	2	4	4	3	2	4	1	1	1	1	1	0	1	0	0	0	3	3
Female	27	25-29 yr	unmarried	Diploma degree	21,000-29,999	Govt	Primary	general	<37 hours	<3 years	No	Yes	No	No	0	0	0	0	0	1	1	1	1	2	1	1	1	2	3	4	3	1	1	4	4	1	4	1	3	0	0	0	0	0	0	0	0	4	4
Female	29	25-29 yr	married	Diploma degree	21,000-29,999	Govt	Tertiary	med	>48 hours	>5 years	No	Yes	No	No	0	1	1	0	0	1	2	1	1	1	1	2	3	2	3	3	1	3	2	2	2	2	1	1	3	0	2	1	1	3	3	1	0	5	5
Female	22.3	<25 yr	unmarried	Diploma degree	<21,000	Private	Secondary	gyn	37-48 hours	<3 years	Yes	Yes	No	No	0	3	0	0	0	2	2	2	5	2	5	2	2	2	4	3	4	4	4	4	4	4	4	4	3	3	3	1	2	0	0	0	0	3	3
Female	26	25-29 yr	unmarried	Bachelor's degree	<21,000	Private	Secondary	criti	37-48 hours	3-5 years	Yes	Yes	No	Yes	0	3	3	0	0	1	2	2	2	5	2	5	5	2	5	4	4	1	3	4	3	3	4	1	3	0	1	1	3	1	0	0	1	2	5
Female	29.7	25-29 yr	unmarried	Bachelor's degree	21,000-29,999	Govt	Secondary	general	>48 hours	>5 years	No	Yes	No	No	1	3	3	0	0	1	2	4	3	3	3	2	2	2	5	5	5	3	5	6	2	4	4	4	0	2	0	1	0	1	0	0	0	3	2
Female	28	25-29 yr	married	Master's degree or above	21,000-29,999	Govt	Tertiary	criti	<37 hours	>5 years	Yes	Yes	No	No	0	0	0	0	0	1	1	1	1	1	1	2	2	2	3	2	3	1	2	3	2	3	2	3	1	3	0	1	1	1	1	0	0	3	4
Female	22.8	<25 yr	unmarried	Diploma degree	<21,000	Private	Secondary	criti	37-48 hours	<3 years	Yes	No	No	No	0	3	1	1	1	2	1	1	1	1	2	2	4	2	3	1	4	1	4	4	3	1	6	1	3	1	0	1	1	0	0	0	0	3	5
Female	24.3	<25 yr	married	Diploma degree	>29,999	Govt	Tertiary	surg	37-48 hours	3-5 years	Yes	Yes	No	No	3	3	0	0	0	2	2	2	1	1	2	2	2	2	4	4	4	2	4	4	4	4	5	4	3	1	3	2	0	2	1	0	3	5	4
Female	26	25-29 yr	married	Bachelor's degree	>29,999	Govt	Tertiary	gyn	>48 hours	>5 years	No	Yes	No	No	1	3	2	0	0	2	3	5	3	3	4	3	4	3	5	3	4	3	4	5	4	4	7	3	3	2	2	2	2	0	0	2	0	4	5
Female	24	<25 yr	unmarried	Bachelor's degree	<21,000	Private	Tertiary	criti	37-48 hours	<3 years	Yes	Yes	No	No	2	2	0	0	0	1	1	1	1	1	4	2	2	1	3	2	1	2	1	1	3	1	5	3	2	0	1	1	3	0	0	0	0	4	3
Female	36	>29 yr	married	Diploma degree	21,000-29,999	Govt	Tertiary	med	37-48 hours	>5 years	No	Yes	No	No	0	3	0	0	0	1	1	1	1	1	3	1	1	1	1	4	3	1	1	3	1	7	2	1	1	1	1	0	0	1	1	1	0	4	4
Female	25.3	25-29 yr	unmarried	Diploma degree	21,000-29,999	Private	Secondary	gyn	<37 hours	>5 years	Yes	Yes	No	No	0	0	0	0	0	1	1	1	1	2	1	1	2	2	4	1	1	1	4	3	4	1	4	1	2	1	0	1	1	0	0	0	0	5	4
Female	27.4	25-29 yr	unmarried	Diploma degree	21,000-29,999	Govt	Tertiary	criti	37-48 hours	>5 years	No	Yes	No	No	0	3	1	1	0	2	1	1	1	2	2	2	2	2	4	4	4	3	7	7	4	4	7	1	3	3	3	3	0	1	3	3	3	2	2
Female	27	25-29 yr	unmarried	Master's degree or above	21,000-29,999	Govt	Secondary	med	37-48 hours	3-5 years	Yes	Yes	No	Yes	0	3	0	0	0	1	1	1	1	1	1	1	1	1	4	5	5	1	1	4	1	1	4	1	3	0	0	0	0	0	0	0	0	4	4
Female	21.6	<25 yr	unmarried	Diploma degree	<21,000	Private	Secondary	surg	<37 hours	<3 years	No	Yes	No	No	0	1	0	0	0	1	2	2	1	1	1	1	2	1	4	3	3	2	4	4	3	3	4	3	1	0	0	1	0	1	0	0	1	4	4
Female	22.8	<25 yr	unmarried	Diploma degree	<21,000	Private	Secondary	med	<37 hours	<3 years	Yes	Yes	No	No	0	3	2	0	0	1	2	2	3	4	2	4	1	4	6	6	5	1	1	4	4	5	5	5	1	1	2	1	0	0	3	0	1	3	3
Female	29.7	25-29 yr	married	Diploma degree	21,000-29,999	Govt	Tertiary	surg	<37 hours	>5 years	No	Yes	No	No	1	2	3	1	0	2	4	2	3	3	4	2	4	3	5	5	5	4	6	6	2	5	6	3	2	2	2	1	2	2	1	1	1	2	3
Female	39	>29 yr	married	Master's degree or above	21,000-29,999	Govt	Tertiary	surg	<37 hours	>5 years	Yes	Yes	Yes	Yes	0	0	0	0	0	1	1	1	1	1	1	1	1	1	2	2	2	1	2	1	2	1	2	1	2	0	0	1	1	0	0	0	0	1	5
Female	26.7	25-29 yr	unmarried	Bachelor's degree	21,000-29,999	Govt	Tertiary	surg	<37 hours	<3 years	No	Yes	No	No	2	3	3	3	3	4	2	5	5	5	5	5	5	5	4	5	6	5	6	6	4	5	4	6	2	3	3	3	3	3	3	3	3	2	2
Female	25	25-29 yr	married	Diploma degree	<21,000	Private	Tertiary	surg	37-48 hours	<3 years	No	Yes	No	Yes	0	0	0	0	0	1	2	1	1	2	2	2	2	1	3	5	4	4	1	5	2	1	5	2	1	1	1	1	2	0	3	0	0	3	4
Female	25.6	25-29 yr	unmarried	Master's degree or above	<21,000	Private	Secondary	general	37-48 hours	<3 years	No	Yes	No	Yes	0	0	0	0	0	1	1	1	1	1	1	1	1	1	1	3	1	1	1	2	2	1	3	2	3	0	0	0	3	0	0	0	0	3	3
Female	50	>29 yr	married	Bachelor's degree	>29,999	Govt	Tertiary	general	<37 hours	>5 years	No	Yes	No	No	1	2	0	0	0	2	2	1	3	2	2	2	2	1	4	2	3	2	3	2	3	2	3	2	1	0	1	1	1	0	1	1	1	5	4
Female	25.8	25-29 yr	married	Master's degree or above	>29,999	Private	Primary	em	37-48 hours	<3 years	Yes	No	No	No	0	3	3	2	0	2	2	5	1	2	5	5	1	2	7	5	7	1	4	5	6	7	1	6	1	2	2	3	2	1	3	2	0	3	3
Female	23.6	<25 yr	unmarried	Diploma degree	>29,999	Private	Tertiary	gyn	<37 hours	<3 years	Yes	Yes	Yes	Yes	0	1	0	0	0	1	2	1	1	2	1	1	2	1	2	1	1	1	2	2	3	1	2	1	3	0	1	0	0	0	1	0	0	4	4
Female	34.7	>29 yr	married	Bachelor's degree	>29,999	Govt	Tertiary	surg	<37 hours	>5 years	No	Yes	Yes	No	0	2	0	0	0	2	3	3	2	2	3	2	2	2	3	3	4	4	4	4	3	3	3	2	1	1	0	0	0	0	0	1	1	3	3
Female	26	25-29 yr	unmarried	Bachelor's degree	21,000-29,999	Govt	Tertiary	surg	<37 hours	3-5 years	No	Yes	No	No	0	0	0	0	0	1	1	1	1	1	2	2	2	2	1	1	1	1	1	1	1	1	1	1	3	0	0	0	0	0	0	0	0	5	5
Female	25	25-29 yr	married	Bachelor's degree	<21,000	Private	Tertiary	criti	<37 hours	3-5 years	Yes	Yes	No	No	0	1	0	0	0	1	1	2	2	2	1	2	3	2	2	1	2	1	1	2	1	2	1	1	1	2	2	2	3	0	1	2	0	2	1
Female	33.4	>29 yr	married	Diploma degree	21,000-29,999	Govt	Primary	general	<37 hours	3-5 years	No	Yes	Yes	No	1	2	1	2	3	2	2	1	2	2	2	2	2	2	4	3	3	3	4	3	4	2	4	1	3	0	0	1	1	0	0	0	0	5	5
Female	31.3	>29 yr	married	Bachelor's degree	>29,999	Govt	Tertiary	surg	<37 hours	>5 years	No	Yes	No	No	0	0	0	0	0	2	2	2	1	1	3	1	4	2	4	4	3	3	5	4	3	5	4	3	1	1	2	2	2	1	2	2	1	3	3
Female	33.2	>29 yr	married	Diploma degree	>29,999	Govt	Tertiary	surg	<37 hours	>5 years	No	Yes	No	No	1	2	1	0	0	3	2	2	2	4	3	2	5	2	3	3	2	1	1	3	1	1	2	2	2	2	1	1	1	1	1	1	1	3	3
Female	29	25-29 yr	married	Diploma degree	>29,999	Private	Tertiary	general	37-48 hours	>5 years	Yes	Yes	Yes	Yes	0	0	0	0	0	1	1	1	1	1	1	1	1	1	1	1	1	1	1	1	1	1	1	1	3	0	0	0	0	0	0	0	0	5	5
Female	50	>29 yr	married	Master's degree or above	>29,999	Govt	Tertiary	criti	<37 hours	>5 years	No	Yes	No	No	2	1	1	1	1	2	2	2	2	2	2	3	3	1	5	3	3	2	4	4	4	2	4	2	2	2	1	1	1	1	1	1	2	4	3
Female	44.9	>29 yr	married	Bachelor's degree	>29,999	Govt	Tertiary	gyn	37-48 hours	>5 years	No	Yes	No	No	0	3	1	0	0	4	5	4	5	5	5	5	5	3	4	4	3	3	2	3	4	1	3	1	3	1	0	0	1	0	0	0	0	4	5
Female	30	>29 yr	married	Bachelor's degree	>29,999	Govt	Tertiary	surg	<37 hours	>5 years	Yes	Yes	No	No	0	0	0	0	0	2	3	1	1	1	1	5	1	1	3	1	2	1	1	2	2	1	3	1	3	1	1	1	0	2	0	1	0	3	3
Female	34.2	>29 yr	married	Bachelor's degree	>29,999	Govt	Tertiary	surg	<37 hours	>5 years	Yes	Yes	No	No	0	1	0	0	0	2	2	1	2	2	4	2	4	2	3	4	4	3	3	4	4	4	4	3	1	1	1	1	1	0	1	1	1	3	3
Female	27.8	25-29 yr	unmarried	Bachelor's degree	21,000-29,999	Govt	Tertiary	surg	37-48 hours	3-5 years	No	Yes	No	No	0	3	1	0	0	2	2	1	1	1	1	1	2	3	3	5	4	3	4	6	3	1	4	2	3	2	1	1	2	1	1	1	0	3	3
Female	30	>29 yr	married	Bachelor's degree	21,000-29,999	Private	Secondary	med	>48 hours	3-5 years	No	Yes	No	Yes	0	2	1	1	0	2	2	1	2	1	2	2	2	2	4	2	3	1	3	3	2	1	3	1	1	0	0	2	0	0	0	0	0	4	4
Female	27.2	25-29 yr	married	Bachelor's degree	21,000-29,999	Govt	Tertiary	surg	<37 hours	3-5 years	No	Yes	No	No	0	1	0	0	0	2	2	1	1	2	4	2	4	2	3	3	3	3	3	3	3	3	3	3	1	1	2	2	2	2	0	2	2	3	3
Female	25	25-29 yr	married	Diploma degree	<21,000	Private	Secondary	gyn	37-48 hours	3-5 years	Yes	Yes	No	No	0	0	0	1	1	1	1	2	1	2	2	2	1	1	4	1	4	1	1	1	1	1	1	1	0	0	0	1	0	0	0	0	0	1	1
Female	29	25-29 yr	married	Bachelor's degree	>29,999	Govt	Tertiary	criti	>48 hours	>5 years	Yes	Yes	Yes	Yes	0	3	0	0	0	2	2	1	1	2	2	2	3	1	4	5	5	3	3	5	3	1	7	2	3	1	3	1	3	0	1	0	0	4	5
Female	28	25-29 yr	married	Diploma degree	21,000-29,999	Govt	Primary	general	37-48 hours	>5 years	No	Yes	No	No	0	0	0	0	0	1	1	1	1	1	1	1	1	1	3	1	1	1	4	3	3	1	4	1	3	0	1	1	1	0	2	0	0	5	5
Female	25	25-29 yr	unmarried	Bachelor's degree	>29,999	Private	Primary	em	37-48 hours	<3 years	No	Yes	No	No	0	2	0	0	0	3	1	1	1	1	3	1	1	1	5	4	4	3	3	3	4	2	3	2	1	1	0	1	0	1	2	1	1	4	4
Female	23	<25 yr	unmarried	Diploma degree	<21,000	Private	Primary	general	>48 hours	<3 years	Yes	Yes	Yes	No	0	0	0	0	0	1	1	1	1	1	5	1	1	1	7	7	7	1	3	3	4	2	7	1	3	1	0	3	3	3	0	0	0	2	2
Female	23.5	<25 yr	unmarried	Diploma degree	<21,000	Private	Tertiary	gyn	37-48 hours	<3 years	Yes	Yes	No	No	0	2	1	0	0	1	1	1	1	3	2	1	2	1	7	4	7	2	2	3	4	4	1	1	3	0	1	2	2	0	1	1	0	4	4
Female	25.3	25-29 yr	married	Bachelor's degree	21,000-29,999	Govt	Tertiary	med	37-48 hours	3-5 years	No	Yes	No	No	3	3	3	3	0	5	2	1	5	5	5	5	5	2	7	7	7	7	7	7	3	7	7	6	0	3	3	3	0	3	3	1	1	1	2
Female	36.2	>29 yr	married	Bachelor's degree	>29,999	Govt	Secondary	med	>48 hours	>5 years	Yes	Yes	No	Yes	3	3	1	0	0	3	3	3	4	2	1	2	1	2	2	2	2	1	3	2	2	2	2	2	3	1	1	1	1	0	0	0	0	5	5
Female	23.3	<25 yr	unmarried	Diploma degree	<21,000	Private	Primary	general	37-48 hours	<3 years	Yes	Yes	No	No	0	1	0	0	0	2	2	1	1	1	2	1	1	1	7	3	3	1	3	3	4	1	3	1	3	3	0	0	0	3	1	3	3	2	2
Female	32	>29 yr	married	Diploma degree	21,000-29,999	Govt	Tertiary	surg	<37 hours	>5 years	Yes	Yes	No	No	0	1	1	0	1	2	2	2	2	2	2	2	2	2	4	4	4	1	3	3	4	4	4	5	1	1	1	1	1	3	0	0	1	3	4
Female	25	25-29 yr	unmarried	Diploma degree	<21,000	Private	Primary	criti	37-48 hours	3-5 years	Yes	No	Yes	Yes	0	0	3	0	0	1	1	1	2	1	2	2	2	1	4	3	4	1	3	3	2	1	4	1	3	2	2	1	1	0	0	1	1	3	3
Female	23.7	<25 yr	married	Diploma degree	21,000-29,999	Govt	Tertiary	general	<37 hours	<3 years	Yes	Yes	Yes	Yes	0	3	0	0	0	1	2	1	2	2	2	2	2	2	4	3	1	1	4	4	4	4	4	4	0	1	0	0	0	0	1	0	0	4	1
Female	33.3	>29 yr	married	Master's degree or above	<21,000	Govt	Secondary	general	<37 hours	<3 years	No	Yes	No	No	0	2	0	0	0	5	1	1	1	1	2	1	1	1	4	5	4	1	4	3	5	3	7	5	3	3	0	2	1	3	3	0	0	2	2
Female	25.7	25-29 yr	unmarried	Bachelor's degree	21,000-29,999	Govt	Tertiary	med	<37 hours	<3 years	No	Yes	No	No	0	3	0	0	0	1	1	2	1	1	1	1	1	1	6	4	6	1	3	3	3	1	4	5	1	2	1	3	3	3	3	0	1	4	3
Female	22	<25 yr	unmarried	Diploma degree	<21,000	Private	Tertiary	criti	37-48 hours	<3 years	Yes	Yes	No	No	0	0	0	0	0	1	1	1	1	1	2	2	2	2	2	2	2	1	1	1	2	1	2	2	2	1	1	1	1	0	1	0	0	4	3
Female	29	25-29 yr	unmarried	Bachelor's degree	21,000-29,999	Govt	Tertiary	med	<37 hours	3-5 years	Yes	Yes	No	No	0	2	2	2	1	2	2	2	2	2	2	2	2	2	5	6	6	4	4	4	3	4	2	4	1	2	0	1	0	1	0	1	0	3	3
Female	42	>29 yr	married	Bachelor's degree	>29,999	Govt	Tertiary	general	37-48 hours	>5 years	No	Yes	No	No	0	0	1	0	0	4	4	4	4	4	4	3	4	3	7	7	6	5	5	4	2	4	4		2	2	2	2	3	3	3	2	2	4	5
Female	25.5	25-29 yr	married	Bachelor's degree	21,000-29,999	Govt	Secondary	criti	<37 hours	3-5 years	No	Yes	No	No	0	1	2	0	0	1	1	2	1	2	1	1	2	1	3	2	1	1	3	3	3	1	3	1	3	1	1	1	1	1	1	0	1	4	4
Female	26	25-29 yr	married	Diploma degree	<21,000	Private	Tertiary	gyn	<37 hours	3-5 years	Yes	Yes	Yes	Yes	1	0	0	0	0	3	1	1	1	1	1	1	1	2	2	1	1	1	1	1	1	1	1	1	3	0	0	0	0	0	0	0	0	3	3
Female	40	>29 yr	unmarried	Master's degree or above	>29,999	Govt	Tertiary	med	<37 hours	>5 years	No	Yes	No	No	0	3	0	2	0	2	3	1	5	2	3	3	1	2	2	3	1	7	1	2	1	1	7	2	3	2	0	0	2	2	0	0	0	3	2
Female	25	25-29 yr	married	Bachelor's degree	<21,000	Private	Tertiary	criti	<37 hours	<3 years	Yes	No	Yes	Yes	1	1	0	3	1	1	2	2	2	5	1	1	2	4	4	4	4	1	4	4	4	5	4	4	1	1	1	1	0	1	1	0	1	4	4
Female	30	>29 yr	unmarried	Master's degree or above	21,000-29,999	Govt	Tertiary	med	<37 hours	>5 years	No	Yes	No	No	0	3	0	2	0	2	3	1	5	3	3	3	1	2	2	3	1	7	1	2	1	1	7	2	3	2	0	0	2	2	0	0	0	3	2
Female	35	>29 yr	married	Diploma degree	>29,999	Govt	Tertiary	general	37-48 hours	3-5 years	Yes	Yes	No	No	0	0	1	0	0	2	2	2	2	1	4	1	2	1	7	7	7	1	2	6	6	5	3	5	3	3	3	2	3	3	3	2	3	4	4
Female	30	>29 yr	married	Master's degree or above	21,000-29,999	Govt	Tertiary	med	37-48 hours	<3 years	No	Yes	No	No	0	3	2	0	0	3	2	2	2	3	2	2	2	2	5	4	4	3	5	4	3	5	3	3	1	1	1	1	1	2	2	1	1	4	4
Female	38	>29 yr	married	Bachelor's degree	>29,999	Govt	Tertiary	surg	<37 hours	>5 years	No	Yes	Yes	No	0	3	2	2	1	2	4	2	3	2	4	2	3	3	6	6	6	6	6	6	6	6	6	3	1	0	1	1	3	1	1	1	1	3	3
Female	35.4	>29 yr	married	Bachelor's degree	21,000-29,999	Govt	Primary	general	<37 hours	>5 years	No	Yes	No	No	0	2	0	0	0	2	2	2	2	2	1	2	2	1	3	2	1	3	2	2	4	2	2	1	2	0	1	1	0	0	0	0	0	5	4
Female	24	<25 yr	married	Diploma degree	21,000-29,999	Private	Primary	surg	<37 hours	<3 years	Yes	Yes	Yes	No	0	3	2	0	0	2	2	2	2	2	5	2	2	2	3	1	2	3	3	2	4	3	5	1	1	0	1	0	0	0	3	1	0	3	3
Female	52	>29 yr	married	Bachelor's degree	>29,999	Govt	Tertiary	criti	<37 hours	>5 years	No	Yes	No	No	1	2	0	0	0	2	2	1	3	2	2	2	2	1	4	2	3	2	3	2	3	2	3	2	1	0	1	1	1	0	1	1	1	5	4
Female	24.3	<25 yr	married	Bachelor's degree	<21,000	Private	Tertiary	med	<37 hours	>5 years	Yes	Yes	No	No	1	3	3	0	0	2	2	4	2	2	2	5	2	2	5	5	3	2	5	5	7	5	4	5	2	3	1	3	3	2	2	2	0	3	3
Female	25	25-29 yr	married	Diploma degree	21,000-29,999	Govt	Tertiary	general	<37 hours	<3 years	No	Yes	Yes	No	3	3	2	0	0	1	2	1	4	5	5	3	4	3	6	5	6	1	4	4	4	4	3	5	2	1	2	1	1	0	0	1	0	3	4
Female	38.8	>29 yr	married	Bachelor's degree	>29,999	Govt	Tertiary	surg	<37 hours	>5 years	No	Yes	No	No	0	1	0	0	0	2	2	2	1	2	4	2	3	2	7	7	7	7	6	6	6	6	6	4	2	1	2	2	2	0	1	1	2	2	2
Female	32	>29 yr	married	Diploma degree	>29,999	Govt	Tertiary	general	37-48 hours	>5 years	Yes	Yes	No	No	0	1	0	2	0	1	2	1	1	1	2	2	5	1	3	1	2	2	1	3	2	1	3	1	3	0	0	1	0	2	1	0	0	4	4
Female	27	25-29 yr	unmarried	Master's degree or above	21,000-29,999	Govt	Tertiary	med	<37 hours	3-5 years	Yes	Yes	No	No	0	1	0	0	0	2	1	1	1	1	1	1	1	1	4	3	3	2	3	3	3	1	4	3	1	1	1	1	1	1	1	0	0	4	3
Female	23.3	<25 yr	unmarried	Diploma degree	<21,000	Private	Primary	med	37-48 hours	<3 years	No	No	No	No	0	0	0	0	0	1	1	1	1	1	2	1	1	1	4	1	3	1	3	4	4	1	5	6	1	1	1	3	3	0	3	0	0	2	2
Female	27	25-29 yr	unmarried	Diploma degree	<21,000	Private	Tertiary	general	37-48 hours	3-5 years	No	Yes	No	No	0	0	0	0	0	1	2	1	1	1	2	1	2	1	1	3	3	4	2	2	1	1	5	1	1	0	1	1	0	0	3	0	0	4	3
Female	24.9	<25 yr	married	Master's degree or above	21,000-29,999	Private	Tertiary	med	<37 hours	<3 years	No	Yes	No	No	0	3	0	0	0	1	1	1	4	3	4	4	4	4	7	7	6	6	6	6	7	5	6	3	1	1	2	3	2	2	2	2	0	2	3
Female	26	25-29 yr	unmarried	Bachelor's degree	21,000-29,999	Govt	Tertiary	surg	<37 hours	<3 years	Yes	Yes	Yes	Yes	0	0	0	0	0	1	1	1	1	2	1	1	1	1	4	4	1	1	3	3	4	3	3	1	3	0	0	0	0	0	0	0	0	4	5
Female	25.2	25-29 yr	unmarried	Diploma degree	21,000-29,999	Private	Primary	criti	>48 hours	<3 years	Yes	Yes	No	No	1	0	0	0	0	1	2	2	2	1	5	1	2	1	4	4	1	1	3	2	4	2	6	4	1	1	2	3	3	1	2	1	0	5	4
Female	25	25-29 yr	unmarried	Diploma degree	>29,999	Private	Tertiary	criti	37-48 hours	3-5 years	Yes	Yes	Yes	Yes	0	0	0	0	0	1	1	1	1	1	1	1	1	2	4	2	3	3	3	2	4	1	4	2	3	1	0	0	0	1	0	0	0	4	3
Female	32.4	>29 yr	married	Diploma degree	21,000-29,999	Govt	Secondary	surg	37-48 hours	>5 years	Yes	Yes	No	No	0	1	0	0	0	2	2	1	1	1	1	1	1	1	1	1	1	1	1	1	4	1	4	1	3	0	1	0	0	0	0	0	0	5	5
Female	25.3	25-29 yr	unmarried	Bachelor's degree	<21,000	Private	Primary	criti	37-48 hours	<3 years	No	No	No	No	0	1	0	0	0	2	2	1	1	1	2	2	2	2	4	4	3	3	5	5	4	4	5	3	2	1	0	2	3	3	0	3	2	3	2
Female	26	25-29 yr	unmarried	Master's degree or above	<21,000	Private	Secondary	general	37-48 hours	<3 years	Yes	Yes	No	No	0	0	0	0	0	1	1	1	1	1	1	2	2	1	3	2	2	1	1	1	2	1	6	1	1	1	2	1	2	0	0	0	0	4	2
Female	29	25-29 yr	married	Diploma degree	21,000-29,999	Govt	Tertiary	med	37-48 hours	<3 years	Yes	Yes	No	No	0	0	0	0	0	2	1	2	1	1	1	2	2	1	2	1	1	1	2	2	2	1	1	1	1	1	1	1	1	0	1	0	0	4	4
Female	26.4	25-29 yr	unmarried	Diploma degree	<21,000	Private	Tertiary	criti	>48 hours	<3 years	Yes	No	No	No	0	0	1	0	0	2	2	2	2	3	2	2	1	1	3	3	4	1	4	3	4	4	1	1	3	0	0	0	0	0	0	0	0	2	5
Female	31.7	>29 yr	married	Bachelor's degree	>29,999	Govt	Tertiary	surg	<37 hours	>5 years	No	Yes	No	No	0	1	0	0	0	2	2	1	1	2	4	2	4	3	3	4	5	3	4	5	5	4	4	3	1	3	2	2	3	1	2	1	1	3	3
Female	25	25-29 yr	unmarried	Diploma degree	>29,999	Private	Primary	general	37-48 hours	<3 years	No	Yes	No	No	0	0	0	0	0	2	1	1	1	2	5	2	2	1	7	5	5	1	4	5	4	3	5	7	0	3	1	1	0	0	0	0	0	2	3
Female	25	25-29 yr	unmarried	Diploma degree		Private	Secondary	med	37-48 hours	<3 years	Yes	Yes	No	No	0	0	0	0	0	1	1	1	1	1	1	2	2	1	3	2	2	1	1	1	2	1	6	1	1	1	2	1	2	0	0	0	0	4	2
Female	33	>29 yr	married	Diploma degree	>29,999	Govt	Tertiary	surg	<37 hours	>5 years	Yes	Yes	Yes	Yes	0	0	0	0	0	1	1	2	2	1	2	2	4	2	1	1	1	1	2	2	2	2	3	1	3	0	1	0	1	0	0	1	0	5	5
Female	46	>29 yr	married	Master's degree or above	>29,999	Govt	Tertiary	general	37-48 hours	>5 years	Yes	Yes	Yes	No	0	0	0	0	0	1	1	1	1	1	1	1	1	1	1	1	1	1	1	1	1	1	1	1	3	0	0	0	0	0	0	0	0	5	5
Female	33.7	>29 yr	married	Bachelor's degree	>29,999	Govt	Tertiary	surg	<37 hours	>5 years	No	Yes	Yes	No	0	1	1	0	0	2	2	1	1	1	1	2	2	2	2	3	3	3	2	2	2	2	2	4	1	1	0	0	0	0	0	0	1	3	3
Female	33	>29 yr	married	Bachelor's degree	21,000-29,999	Govt	Tertiary	criti	<37 hours	>5 years	No	Yes	Yes	No	0	0	0	0	0	1	1	2	1	1	1	1	2	1	2	2	3	2	2	3	2	2	2	2	1	1	0	0	0	1	0	0	0	4	3
Female	36.7	>29 yr	married	Bachelor's degree	>29,999	Govt	Tertiary	surg	<37 hours	>5 years	No	Yes	No	No	0	2	2	0	0	2	2	2	4	4	4	2	2	2	6	6	6	6	5	5	3	4	4	4	3	2	2	2	2	2	1	2	2	4	3
Female	24	<25 yr	unmarried	Bachelor's degree	<21,000	Private	Tertiary	surg	>48 hours	<3 years	No	Yes	No	No	0	1	0	1	0	2	2	1	2	2	5	2	2	2	4	6	5	1	4	5	4	2	6	1	2	1	1	1	0	0	0	0	1	3	1
Female	23.5	<25 yr	unmarried	Diploma degree	21,000-29,999	Govt	Tertiary	general	<37 hours	<3 years	Yes	Yes	No	No	0	2	0	0	0	1	1	1	1	2	2	2	2	1	5	3	4	1	4	4	4	3	4	1	3	0	1	1	0	0	0	0	0	4	4
Female	39.6	>29 yr	married	Diploma degree	>29,999	Govt	Tertiary	surg	<37 hours	>5 years	No	Yes	Yes	No	1	1	0	0	0	2	2	2	2	2	2	2	2	1	2	2	2	1	1	2	1	2	2	1	2	1	1	1	0	0	0	0	0	4	4
Female	25.3	25-29 yr	married	Diploma degree	<21,000	Private	Tertiary	general	<37 hours	<3 years	Yes	Yes	No	No	0	0	0	0	0	1	1	2	1	1	2	1	1	1	3	2	1	1	1	1	1	1	1	1	2	0	0	0	0	0	0	0	0	5	4
Female	24.6	<25 yr	unmarried	Diploma degree	<21,000	Private	Primary	general	>48 hours	<3 years	Yes	Yes	No	No	0	1	1	0	0	2	2	1	1	1	2	1	2	1	4	3	2	1	1	3	2	1	2	1	2	2	0	1	1	1	1	0	1	1	5
Female	35.9	>29 yr	married	Diploma degree	>29,999	Govt	Tertiary	med	<37 hours	>5 years	No	Yes	No	Yes	0	3	1	0	0	4	5	3	4	3	5	5	2	3	5	5	7	1	5	5	1	3	1	3	2	2	1	3	2	1	2	1	1	3	4
Female	23.7	<25 yr	unmarried	Bachelor's degree	>29,999	Govt	Secondary	criti	<37 hours	3-5 years	No	No	No	No	0	0	0	2	0	2	2	2	1	2	2	2	2	2	5	3	4	1	4	3	1	1	4	4	1	1	1	1	0	3	3	1	0	4	3
Female	28	25-29 yr	unmarried	Diploma degree	21,000-29,999	Govt	Tertiary	criti	<37 hours	>5 years	No	Yes	No	No	1	2	0	0	0	2	2	1	3	2	2	2	2	1	4	2	3	2	3	2	3	2	3	2	1	0	1	1	1	0	1	1	1	5	4
Female	26	25-29 yr	unmarried	Diploma degree	<21,000	Private	Tertiary	criti	>48 hours	<3 years	Yes	No	No	No	0	0	1	0	0	1	5	5	1	1	1	1	1	1	7	7	1	1	7	7	7	7	7	7	0	3	0	3	0	3	3	0	0	1	2
Female	24	<25 yr	unmarried	Bachelor's degree	<21,000	Private	Tertiary	general	<37 hours	<3 years	Yes	Yes	No	Yes	0	3	2	0	0	1	2	1	1	2	2	1	1	2	6	6	5	3	4	7	1	1	4	5	0	3	0	3	3	0	0	0	0	5	5
Female	30	>29 yr	married	Diploma degree	21,000-29,999	Govt	Tertiary	surg	37-48 hours	3-5 years	Yes	Yes	Yes	No	1	0	0	0	0	3	2	3	3	3	3	1	1	2	5	5	5	1	3	1	2	2	3	2	2	2	2	2	2	1	1	1	1	3	4
Female	34	>29 yr	married	Bachelor's degree	>29,999	Govt	Tertiary	surg	<37 hours	>5 years	No	Yes	Yes	No	0	1	0	0	0	2	2	1	2	1	3	2	4	2	4	4	4	5	4	5	3	3	3	4	1	1	1	1	1	1	1	1	1	3	3
Female	33	>29 yr	married	Bachelor's degree	21,000-29,999	Govt	Tertiary	surg	<37 hours	>5 years	No	Yes	Yes	No	0	0	1	0	0	1	1	2	1	2	1	2	2	1	2	3	1	1	1	1	3	1	2	1	3	0	0	0	0	0	0	0	0	4	5
Female	24.3	<25 yr	unmarried	Diploma degree	<21,000	Private	Tertiary	criti	<37 hours	3-5 years	No	Yes	No	No	2	2	0	0	0	2	2	2	2	3	2	2	2	2	5	5	5	4	5	5	3	5	2	3	1	2	0	0	0	1	1	0	0	2	2
Female	28	25-29 yr	married	Diploma degree	21,000-29,999	Govt	Primary	med	37-48 hours	3-5 years	No	Yes	No	No	0	0	0	0	0	1	5	5	5	5	5	5	5	5	4	7	7	1	7	7	5	7	6	4	2	3	0	1	3	3	0	3	3	4	3
Female	25	25-29 yr	married	Diploma degree	21,000-29,999	Private	Tertiary	surg	37-48 hours	3-5 years	Yes	Yes	No	Yes	0	0	0	1	0	1	1	2	1	1	1	3	3	1	3	3	1	1	1	3	3	1	3	3	3	0	0	0	1	0	0	0	0	5	5
Female	24	<25 yr	married	Bachelor's degree	<21,000	Private	Secondary	gyn	<37 hours	<3 years	Yes	Yes	No	Yes	0	0	0	0	0	1	2	2	2	1	2	1	2	2	5	4	5	2	3	4	3	2	2	1	1	1	0	3	0	1	0	0	0	4	4
Female	32	>29 yr	married	Bachelor's degree	21,000-29,999	Private	Tertiary	general	<37 hours	>5 years	Yes	Yes	No	No	0	0	0	0	0	1	1	1	1	4	4	1	1	1	1	1	1	1	1	1	7	1	7	1	3	0	0	1	1	2	2	1	1	4	4
Female	29.3	25-29 yr	married	Diploma degree	21,000-29,999	Govt	Primary	general	37-48 hours	>5 years	No	No	No	No	0	1	1	0	0	1	2	3	2	1	2	2	2	2	4	1	1	1	1	1	1	1	4	1	3	0	0	0	0	0	0	0	0	4	5
Female	30.4	>29 yr	married	Diploma degree	21,000-29,999	Govt	Tertiary	surg	<37 hours	>5 years	No	Yes	Yes	No	1	2	1	1	0	2	2	2	2	2	3	2	2	2	3	2	2	1	2	2	3	2	2	2	1	1	1	2	2	1	1	0	0	2	2
Female	25.5	25-29 yr	married	Master's degree or above	21,000-29,999	Govt	Tertiary	criti	37-48 hours	3-5 years	No	Yes	No	No	0	3	0	0	0	3	2	2	2	2	2	2	2	1	3	4	4	1	1	3	3	1	4	1	3	0	0	0	0	0	0	0	0	3	5
Female	29	25-29 yr	married	Bachelor's degree	>29,999	Govt	Tertiary	surg	<37 hours	>5 years	No	Yes	No	No	0	1	1	0	0	2	2	2	2	2	2	1	2	2	2	2	2	2	2	2	2	2	2	3	1	1	0	0	0	0	0	0	1	4	4
Female	31	>29 yr	unmarried	Master's degree or above	21,000-29,999	Govt	Tertiary	criti	<37 hours	>5 years	Yes	Yes	No	No	0	0	0	0	0	1	1	2	2	2	2	1	1	1	3	4	5	3	4	4	4	4	4	1	3	0	1	0	0	3	1	1	0	4	4
Female	32.8	>29 yr	unmarried	Master's degree or above	21,000-29,999	Govt	Tertiary	surg	37-48 hours	>5 years	No	Yes	No	No	0	3	3	0	0	2	2	2	2	2	2	2	3	2	4	4	4	4	4	4	4	4	4	4	2	2	0	2	3	2	3	3	1	3	4
Female	27.3	25-29 yr	married	Bachelor's degree	21,000-29,999	Private	Primary	gyn	37-48 hours	>5 years	Yes	No	No	No	0	3	0	0	0	1	1	2	1	2	2	2	2	2	2	2	3	1	4	4	3	4	1	2	1	1	0	1	0	1	0	0	0	3	3
Female	23.3	<25 yr	unmarried	Diploma degree	<21,000	Private	Tertiary	criti	<37 hours	<3 years	Yes	Yes	No	Yes	0	0	0	0	0	1	1	1	1	1	2	1	1	1	2	1	1	1	1	1	2	1	2	1	0	0	1	0	0	0	0	0	0	1	1
Female	24.5	<25 yr	married	Diploma degree	<21,000	Private	Tertiary	general	>48 hours	3-5 years	Yes	Yes	No	Yes	0	1	0	0	0	1	1	2	1	1	2	2	1	1	4	1	1	1	1	1	3	1	1	1	3	0	0	0	0	0	0	0	0	5	5
Female	27	25-29 yr	unmarried	Diploma degree	21,000-29,999	Govt	Tertiary	general	<37 hours	3-5 years	Yes	Yes	No	No	0	1	0	2	0	1	2	1	1	2	2	5	1	1	3	1	2	2	1	3	2	1	3	1	3	0	0	1	0	2	1	0	0	4	4
Female	24.9	<25 yr	married	Diploma degree	<21,000	Private	Primary	general	>48 hours	<3 years	No	No	No	No	0	3	1	3	2	1	5	5	5	5	5	3	5	5	4	6	7	3	7	7	3	7	1	5	0	3	3	0	3	3	3	3	3	2	4
Female	35	>29 yr	married	Diploma degree	>29,999	Govt	Tertiary	gyn	37-48 hours	>5 years	Yes	Yes	No	No	0	3	0	0	0	2	2	2	2	2	1	2	2	2	1	1	1	7	7	7	1	1	7	1	3	0	0	0	0	3	0	0	0	5	5
Female	26	25-29 yr	unmarried	Diploma degree	<21,000	Private	Tertiary	criti	>48 hours	3-5 years	Yes	Yes	No	No	0	3	0	0	0	1	2	1	1	1	5	1	1	1	1	1	1	1	7	7	1	1	1	1	3	3	0	1	3	2	0	3	0	5	5
Female	26	25-29 yr	unmarried	Bachelor's degree	<21,000	Private	Tertiary	criti	>48 hours	<3 years	Yes	Yes	No	No	0	1	0	0	0	1	2	1	2	2	4	2	2	4	4	4	4	3	4	5	4	3	5	4	1	1	3	1	1	3	0	1	1	4	4
Female	26.3	25-29 yr	married	Master's degree or above	21,000-29,999	Govt	Tertiary	criti	<37 hours	3-5 years	Yes	Yes	No	No	0	3	0	0	0	2	2	2	1	2	2	5	3	1	4	5	3	1	1	4	6	1	4	1	0	0	0	1	0	0	0	1	0	4	4
Female	22	<25 yr	married	Diploma degree	<21,000	Private	Tertiary	criti	37-48 hours	<3 years	Yes	Yes	Yes	Yes	3	0	0	0	0	1	1	1	1	3	1	1	1	1	1	1	1	1	1	1	3	1	4	1	3	0	0	0	0	0	0	0	1	5	5
Female	44.5	>29 yr	married	Diploma degree	>29,999	Govt	Secondary	gyn	>48 hours	>5 years	Yes	Yes	No	No	2	2	0	0	0	2	1	2	1	1	1	2	1	1	4	1	4	1	4	1	4	4	3	1	2	0	0	0	0	1	0	0	0	1	1
Female	30	>29 yr	married	Master's degree or above	21,000-29,999	Govt	Secondary	surg	37-48 hours	<3 years	Yes	Yes	Yes	Yes	3	0	0	0	0	2	1	2	1	5	2	5	5	2	7	7	6	2	5	7	7	2	3	1	2	1	2	1	0	0	0	0	0	3	3
Female	25.2	25-29 yr	unmarried	Bachelor's degree	<21,000	Private	Primary	general	37-48 hours	<3 years	Yes	Yes	No	Yes	0	1	0	0	0	1	1	1	1	1	2	1	1	2	4	3	3	1	1	3	3	1	4	1	2	1	2	2	2	1	1	1	1	3	3
Female	24.5	<25 yr	unmarried	Diploma degree	<21,000	Private	Primary	general	>48 hours	3-5 years	Yes	Yes	No	No	0	1	0	0	0	1	1	1	1	1	2	1	1	2	4	4	1	1	4	3	3	3	4	4	3	0	0	0	0	0	0	0	0	4	4
Female	32.4	>29 yr	married	Bachelor's degree	21,000-29,999	Govt	Tertiary	criti	<37 hours	>5 years	No	Yes	No	No	0	0	0	0	0	2	2	2	3	2	3	2	3	2	4	3	4	3	3	4	3	3	3	3	1	1	1	1	1	1	2	1	2	3	3
Female	24	<25 yr	unmarried	Bachelor's degree	<21,000	Private	Secondary	criti	37-48 hours	<3 years	Yes	Yes	No	No	0	2	1	1	0	2	2	2	2	2	2	2	2	2	4	3	3	3	4	4	3	3	5	2	3	1	3	2	2	2	1	0	3	5	5
Female	30.7	>29 yr	unmarried	Bachelor's degree	>29,999	Govt	Secondary	criti	37-48 hours	>5 years	No	Yes	No	No	0	1	0	0	0	2	2	2	2	1	2	2	2	2	1	4	4	3	3	3	1	1	3	1	3	1	1	1	0	1	0	0	0	4	4
Female	26	25-29 yr	unmarried	Diploma degree	21,000-29,999	Govt	Tertiary	criti	37-48 hours	3-5 years	No	Yes	No	No	0	2	1	0	0	2	5	2	5	3	1	2	5	5	4	5	4	1	4	4	3	2	5	4	1	3	3	2	1	1	0	0	1	5	3
Female	26	25-29 yr	married	Bachelor's degree	<21,000	Private	Tertiary	surg	37-48 hours	3-5 years	No	No	No	No	0	2	1	0	0	1	5	5	5	1	1	5	5	5	7	7	7	3	7	7	3	7	3	3	0	1	2	1	0	0	1	1	1	1	1
Female	27.8	25-29 yr	married	Bachelor's degree	21,000-29,999	Govt	Tertiary	criti	37-48 hours	3-5 years	No	Yes	No	No	0	3	1	0	0	2	3	1	2	1	1	1	2	2	2	1	1	1	1	1	1	1	2	1	3	0	2	2	1	0	0	0	0	5	5
Female	23	<25 yr	married	Diploma degree	<21,000	Private	Primary	gyn	>48 hours	<3 years	Yes	No	No	No	0	3	0	0	0	1	2	2	1	1	1	1	1	2	5	3	2	1	5	4	7	3	5	3	1	2	0	3	3	3	1	0	3	1	1
Female	30	>29 yr	married	Diploma degree	>29,999	Govt	Tertiary	med	<37 hours	>5 years	No	Yes	No	No	0	3	0	0	0	2	2	2	2	2	2	2	2	1	4	3	4	1	4	3	4	4	2	1	3	0	0	1	1	3	0	1	0	5	4
Female	25	25-29 yr	married	Diploma degree	21,000-29,999	Govt	Tertiary	surg	<37 hours	3-5 years	No	Yes	No	No	3	3	3	0	0	1	2	5	1	2	2	1	1	1	6	4	7	3	4	5	4	1	7	1	3	1	0	0	3	3	3	3	0	1	4
Female	23	<25 yr	unmarried	Bachelor's degree	<21,000	Private	Tertiary	med	<37 hours	<3 years	Yes	No	Yes	Yes	1	1	1	1	0	2	5	2	5	5	5	5	4	2	5	4	5	6	7	5	3	6	3	5	1	1	0	1	0	2	0	0	0	3	3
Female	39.2	>29 yr	married	Bachelor's degree	>29,999	Govt	Tertiary	surg	<37 hours	>5 years	Yes	Yes	Yes	No	0	2	0	0	0	2	2	1	2	1	2	2	4	2	3	3	4	4	4	4	2	2	6	3	1	1	1	1	1	2	2	1	2	2	3
Female	23	<25 yr	unmarried	Diploma degree	<21,000	Private	Tertiary	criti	37-48 hours	>5 years	Yes	Yes	No	No	1	0	1	1	1	1	1	1	1	1	1	1	1	1	1	1	1	1	1	1	1	1	3	1	3	0	0	0	3	0	0	3	0	1	1
Female	21.9	<25 yr	unmarried	Diploma degree	<21,000	Private	Primary	med	>48 hours	<3 years	No	Yes	Yes	No	0	0	0	0	0	1	1	1	1	1	1	1	1	1	3	1	1	1	1	1	4	1	4	1	3	0	0	2	2	0	0	0	0	4	4
Female	25.4	25-29 yr	unmarried	Diploma degree	<21,000	Private	Primary	surg	>48 hours	<3 years	Yes	Yes	No	No	0	1	0	0	0	1	1	1	1	1	2	1	1	1	3	1	3	1	3	1	3	1	1	1	3	0	0	0	0	0	3	0	0	4	4
Female	25.3	25-29 yr	married	Diploma degree	21,000-29,999	Govt	Secondary	surg	<37 hours	>5 years	No	Yes	No	No	0	1	0	0	0	2	2	2	2	2	2	2	2	1	3	4	4	3	4	4	4	4	5	3	2	2	1	3	2	2	3	1	0	4	4
Female	26.2	25-29 yr	married	Diploma degree	21,000-29,999	Govt	Tertiary	criti	<37 hours	>5 years	No	Yes	No	Yes	0	3	0	0	0	1	1	1	1	1	2	4	4	5	5	3	1	2	3	3	4	3	5	1	3	1	3	2	2	3	3	0	0	4	4
Female	21.9	<25 yr	unmarried	Diploma degree	<21,000	Private	Tertiary	surg	37-48 hours	<3 years	No	Yes	No	No	0	0	0	0	0	1	1	2	1	1	2	2	2	1	4	3	3	1	4	5	3	1	7	2	2	2	3	1	1	0	0	1	0	3	3
Female	24.3	<25 yr	married	Master's degree or above	<21,000	Private	Tertiary	med	37-48 hours	<3 years	Yes	Yes	Yes	Yes	0	0	0	0	0	1	1	1	1	1	2	2	1	1	4	3	1	1	1	1	4	1	3	1	3	0	1	1	0	0	0	0	0	5	5
Female	49	>29 yr	married	Bachelor's degree	>29,999	Govt	Tertiary	criti	<37 hours	>5 years	Yes	Yes	Yes	No	0	0	0	0	0	2	1	2	3	4	5	2	2	2	7	6	6	4	4	5	4	3	5	4	1	2	2	1	1	1	1	1	0	5	5
Female	42.7	>29 yr	married	Bachelor's degree	>29,999	Govt	Tertiary	surg	<37 hours	>5 years	Yes	Yes	Yes	No	0	1	0	0	0	2	1	1	2	2	2	1	2	1	2	2	2	1	2	2	1	1	2	2	1	1	1	1	1	0	0	1	1	4	4
Female	38	>29 yr	married	Master's degree or above	>29,999	Govt	Tertiary	med	<37 hours	>5 years	No	Yes	Yes	No	0	1	0	0	0	1	1	1	1	1	1	1	1	1	4	1	1	1	3	1	3	1	5	1	2	1	0	1	1	0	0	0	0	5	5
Female	25.2	25-29 yr	unmarried	Bachelor's degree	21,000-29,999	Private	Tertiary	med	>48 hours	<3 years	Yes	Yes	No	No	0	0	0	0	0	2	2	2	1	2	2	2	2	1	3	4	4	1	4	4	4	4	6	3	1	1	0	1	0	1	2	2	0	1	1
Female	28.6	25-29 yr	unmarried	Master's degree or above	21,000-29,999	Govt	Secondary	med	<37 hours	3-5 years	No	Yes	No	No	0	2	1	0	0	2	2	1	1	4	3	2	4	4	4	7	7	4	7	7	1	5	4	6	1	3	3	1	1	3	1	2	2	1	1
Female	31	>29 yr	married	Diploma degree	21,000-29,999	Govt	Tertiary	criti	37-48 hours	>5 years	Yes	Yes	No	No	0	3	0	0	0	1	1	1	1	4	1	1	2	1	4	4	1	1	4	4	7	1	2	3	2	1	2	2	2	1	2	2	1	2	3
Female	42	>29 yr	married	Bachelor's degree	>29,999	Govt	Tertiary	general	37-48 hours	>5 years	Yes	Yes	No	No	0	1	0	2	0	1	2	1	1	2	2	5	1	1	3	1	2	2	1	3	2	1	3	1	3	0	0	1	0	2	1	0	0	4	4
Female	32.2	>29 yr	married	Bachelor's degree	21,000-29,999	Govt	Tertiary	criti	<37 hours	>5 years	No	Yes	No	Yes	0	3	0	0	0	2	2	2	2	2	2	2	2	2	4	4	3	1	4	4	4	1	4	3	0	0	0	0	0	0	0	0	0	3	4
Female	31	>29 yr	married	Master's degree or above	>29,999	Govt	Tertiary	surg	<37 hours	>5 years	No	Yes	Yes	No	0	2	1	0	0	2	2	2	2	2	3	2	4	2	3	3	4	2	3	3	3	3	3	3	1	1	1	1	1	1	1	1	1	4	3
Female	32	>29 yr	married	Diploma degree	21,000-29,999	Govt	Tertiary	med	<37 hours	>5 years	No	Yes	No	No	3	3	0	1	0	2	5	5	5	1	5	5	5	5	3	1	1	1	4	1	4	1	7	5	3	1	0	0	0	2	0	0	0	3	4
Female	29.6	25-29 yr	unmarried	Bachelor's degree	>29,999	Govt	Tertiary	surg	<37 hours	>5 years	No	Yes	Yes	No	0	1	0	0	0	2	3	2	2	1	3	2	4	2	4	5	5	3	3	4	4	3	4	3	1	1	1	2	1	1	1	0	0	4	3
Female	24.2	<25 yr	married	Diploma degree	21,000-29,999	Govt	Tertiary	criti	<37 hours	3-5 years	No	Yes	No	Yes	0	0	0	0	0	1	1	1	1	1	2	2	1	1	3	3	3	1	2	1	3	2	3	1	3	0	1	1	1	0	0	1	0	5	4
Female	25.2	25-29 yr	unmarried	Bachelor's degree	<21,000	Private	Tertiary	criti	>48 hours	<3 years	Yes	Yes	Yes	No	0	0	0	0	0	1	1	2	1	2	2	1	1	1	4	3	4	1	2	1	4	1	1	1	3	0	0	0	1	2	0	0	0	3	3
Female	25.4	25-29 yr	married	Bachelor's degree	<21,000	Private	Tertiary	criti	37-48 hours	3-5 years	No	Yes	No	No	0	3	0	0	0	2	2	2	1	4	2	1	1	2	5	5	3	2	4	2	2	2	2	2	2	2	1	2	0	0	1	1	0	1	1
Female	22	<25 yr	unmarried	Diploma degree	21,000-29,999	Govt	Tertiary	general	>48 hours	<3 years	No	No	Yes	No	0	1	0	0	0	1	1	1	1	1	2	1	2	1	5	4	3	1	3	3	4	1	7	3	3	0	0	1	3	0	3	0	0	4	5
Female	27	25-29 yr	unmarried	Bachelor's degree	21,000-29,999	Govt	Tertiary	surg	<37 hours	3-5 years	No	Yes	No	No	0	0	0	0	0	2	2	1	2	1	4	1	3	1	2	2	2	1	2	2	1	1	2	3	1	0	1	0	0	0	1	1	1	3	3
Female	23	<25 yr	unmarried	Diploma degree	<21,000	Private	Tertiary	med	37-48 hours	<3 years	Yes	Yes	No	No	0	0	0	0	0	1	1	1	1	3	3	1	2	1	4	5	5	3	5	5	4	1	6	5	1	0	3	0	3	0	1	0	3	4	1
Female	25	25-29 yr	unmarried	Diploma degree	21,000-29,999	Govt	Tertiary	criti	37-48 hours	>5 years	Yes	Yes	No	No	0	0	0	0	0	1	1	1	1	1	2	1	1	1	5	4	5	1	4	4	3	3	4	3	3	1	3	1	3	0	0	0	0	4	4
Female	32.2	>29 yr	married	Master's degree or above	>29,999	Govt	Tertiary	med	<37 hours	>5 years	No	Yes	No	No	2	3	3	3	1	5	5	4	5	3	5	2	5	2	5	5	5	6	3	3	5	5	5	3	0	3	2	3	2	1	1	1	1	2	2
Female	26	25-29 yr	married	Master's degree or above	21,000-29,999	Govt	Tertiary	med	37-48 hours	<3 years	No	Yes	No	No	0	3	0	0	0	2	2	2	2	2	2	2	2	2	6	4	3	2	3	3	5	1	7	2	3	0	0	1	1	1	3	2	0	5	5
Female	25.3	25-29 yr	married	Master's degree or above	21,000-29,999	Private	Tertiary	general	37-48 hours	3-5 years	Yes	Yes	No	Yes	0	1	0	0	0	1	1	2	2	1	2	1	1	1	6	3	4	1	3	4	3	1	4	4	1	1	1	3	0	2	0	0	0	3	3
Female	25	25-29 yr	unmarried	Master's degree or above	<21,000	Private	Tertiary	med	>48 hours	<3 years	Yes	Yes	Yes	Yes	0	1	0	0	0	1	1	1	1	1	1	1	1	1	4	2	1	3	1	1	3	2	1	1	3	1	0	0	0	1	0	0	1	4	5
Female	25	25-29 yr	unmarried	Bachelor's degree	<21,000	Private	Tertiary	general	>48 hours	<3 years	Yes	Yes	Yes	Yes	0	2	0	0	0	2	2	2	1	2	4	2	2	2	4	5	4	1	4	5	4	5	2	1	3	1	0	0	0	1	0	0	0	3	4
Female	25	25-29 yr	married	Bachelor's degree	<21,000	Private	Secondary	criti	37-48 hours	>5 years	Yes	Yes	No	Yes	0	3	0	0	0	4	3	5	4	3	4	3	4	2	5	6	5	5	5	4	5	6	4	4	0	3	2	2	2	3	2	1	1	4	2
Female	29	25-29 yr	unmarried	Master's degree or above	21,000-29,999	Govt	Tertiary	med	<37 hours	<3 years	No	Yes	Yes	No	0	0	0	0	0	1	1	1	1	1	1	1	1	1	2	1	2	1	1	1	2	1	1	1	3	0	1	1	1	1	1	0	0	4	3
Female	23.2	<25 yr	unmarried	Bachelor's degree	<21,000	Private	Tertiary	med	>48 hours	<3 years	Yes	Yes	Yes	Yes	0	0	0	1	0	1	1	2	1	2	2	2	2	1	5	7	5	4	4	7	3	3	6	4	1	3	3	1	0	3	0	0	3	4	2
Female	23	<25 yr	unmarried	Diploma degree	21,000-29,999	Private	Secondary	criti	<37 hours	<3 years	Yes	Yes	Yes	Yes	0	3	1	0	0	2	1	1	1	2	2	2	1	5	6	6	6	4	4	7	4	4	4	4	3	1	1	2	3	3	3	1	1	3	2
Female	24	<25 yr	unmarried	Diploma degree	<21,000	Private	Tertiary	gyn	37-48 hours	<3 years	Yes	Yes	No	No	0	3	0	0	0	2	1	1	1	2	1	1	1	1	7	7	7	3	3	7	6	1	6	1	3	3	3	3	0	0	1	3	0	4	5
Female	27.4	25-29 yr	unmarried	Bachelor's degree	21,000-29,999	Govt	Tertiary	criti	37-48 hours	3-5 years	Yes	Yes	Yes	Yes	0	0	3	0	0	1	1	1	1	1	1	1	1	1	3	4	1	1	4	2	1	1	1	4	3	0	0	0	0	0	0	0	0	4	3
Female	24	<25 yr	unmarried	Bachelor's degree	<21,000	Private	Secondary	surg	<37 hours	<3 years	Yes	Yes	No	No	0	3	0	0	0	2	5	1	5	5	2	1	1	3	7	7	7	1	7	7	3	6	7	1	0	3	3	3	0	3	1	0	0	1	1
Female	27.4	25-29 yr	unmarried	Master's degree or above	>29,999	Private	Primary	criti	37-48 hours	3-5 years	No	Yes	Yes	No	0	1	0	0	0	1	1	1	1	1	1	1	1	1	6	4	7	1	4	6	6	6	3	4	0	3	1	3	0	3	1	1	1	1	1
Female	24.4	<25 yr	unmarried	Bachelor's degree		Private	Tertiary	criti	<37 hours	<3 years	Yes	No	No	Yes	0	1	1	0	0	2	2	1	1	2	3	3	2	2	4	3	4	3	5	6	2	3	4	4	3	1	2	1	0	3	2	3	2	3	4
Female	24.3	<25 yr	married	Bachelor's degree	>29,999	Private	Tertiary	general	<37 hours	<3 years	Yes	No	No	No	0	3	0	0	0	2	1	1	1	1	1	1	1	1	5	2	1	1	1	1	3	1	3	1	3	0	0	1	1	0	0	0	0	2	3
Female	31	>29 yr	married	Diploma degree	>29,999	Govt	Tertiary	med	37-48 hours	>5 years	No	Yes	No	No	1	1	0	0	0	2	3	1	1	3	1	2	2	2	4	4	5	4	5	6	6	3	7	1	3	3	2	1	1	1	3	0	2	5	5
Female	36	>29 yr	married	Master's degree or above	>29,999	Govt	Secondary	general	37-48 hours	>5 years	Yes	Yes	No	No	0	0	0	0	0	2	1	1	2	1	1	2	2	1	4	4	4	1	3	4	3	1	5	1	3	1	2	1	1	1	0	0	0	5	5
Female	35	>29 yr	married	Bachelor's degree	21,000-29,999	Govt	Primary	general	37-48 hours	3-5 years	No	Yes	No	No	0	1	0	0	0	1	1	1	1	1	1	2	2	1	3	3	4	3	5	4	3	4	2	1	2	1	1	1	1	1	0	1	0	4	4
Female	27	25-29 yr	married	Master's degree or above	21,000-29,999	Govt	Secondary	general	<37 hours	3-5 years	No	No	No	No	0	1	3	0	0	1	1	1	2	2	2	2	1	1	3	4	5	1	4	4	3	3	3	2	2	1	0	0	0	1	3	0	0	5	4
Female	24	<25 yr	married	Diploma degree	21,000-29,999	Private	Tertiary	criti	37-48 hours	<3 years	Yes	Yes	Yes	No	0	3	3	0	0	1	1	1	1	1	2	1	1	1	7	3	4	2	4	4	6	2	4	4	1	1	2	3	1	0	2	2	0	3	3
Female	23.3	<25 yr	unmarried	Diploma degree	<21,000	Private	Primary	gyn	37-48 hours	<3 years	No	Yes	No	Yes	0	3	1	0	0	2	1	5	2	2	2	2	2	1	4	4	4	2	6	6	3	6	3	6	1	3	1	2	2	3	3	2	2	2	2
Female	22	<25 yr	unmarried	Bachelor's degree	<21,000	Private	Tertiary	surg	>48 hours	<3 years	Yes	Yes	No	No	0	0	0	0	0	1	1	1	1	1	1	1	1	1	2	2	1	1	2	1	2	1	3	1	3	0	1	1	1	0	0	0	0	3	2
Female	24	<25 yr	unmarried	Bachelor's degree	<21,000	Govt	Tertiary	med	37-48 hours	<3 years	No	No	No	No	0	3	0	0	0	2	2	2	2	5	2	2	2	5	6	3	4	4	4	4	4	4	7	7	2	2	0	3	0	0	0	0	0	3	3
Female	56	>29 yr	married	Master's degree or above	>29,999	Govt	Secondary	general	>48 hours	>5 years	Yes	Yes	No	No	3	0	0	2	0	5	2	5	1	2	1	5	2	2	5	7	7	7	7	7	7	7	6	1	2	3	2	2	1	1	3	2	3	1	1
Female	27	25-29 yr	married	Bachelor's degree	21,000-29,999	Private	Tertiary	criti	>48 hours	3-5 years	No	Yes	No	No	0	2	0	1	0	1	2	1	1	2	2	2	2	1	5	4	4	1	3	4	3	1	5	6	2	1	1	1	0	0	1	2	1	4	5
Female	26	25-29 yr	unmarried	Diploma degree	21,000-29,999	Private	Tertiary	med	<37 hours	3-5 years	Yes	Yes	No	No	0	1	0	0	0	2	1	1	1	2	1	1	1	1	4	2	2	1	1	2	2	1	4	1	3	0	1	1	1	0	1	1	0	5	4
Female	25.9	25-29 yr	married	Bachelor's degree	21,000-29,999	Govt	Tertiary	med	<37 hours	<3 years	No	Yes	No	No	0	1	0	0	0	2	2	2	2	2	2	2	2	2	5	5	4	1	4	5	4	4	5	4	1	2	3	1	2	3	3	1	3	3	3
Female	26	25-29 yr	unmarried	Bachelor's degree	21,000-29,999	Private	Tertiary	general	>48 hours	<3 years	Yes	Yes	No	No	0	0	0	0	0	2	1	1	1	2	2	1	2	1	6	4	4	4	3	5	4	4	4	4	2	2	2	2	3	3	2	0	1	3	4
Female	42	>29 yr	married	Master's degree or above	>29,999	Govt	Primary	gyn	>48 hours	>5 years	No	Yes	No	No	2	2	2	0	0	2	2	2	3	2	2	2	3	3	3	4	4	1	4	4	3	4	7	5	3	0	3	3	2	2	1	0	0	4	5
Female	26	25-29 yr	unmarried	Diploma degree	<21,000	Private	Primary	general	>48 hours	<3 years	Yes	Yes	Yes	Yes	0	0	0	0	0	1	1	1	1	1	1	1	1	1	1	1	1	1	1	1	1	1	1	1	3	0	0	0	0	1	3	0	0	5	5
Female	24.5	<25 yr	unmarried	Diploma degree	<21,000	Private	Tertiary	criti	<37 hours	3-5 years	Yes	Yes	No	No	0	0	0	0	0	2	2	2	2	5	2	2	2	1	7	7	7	2	3	6	5	7	7	3	2	2	1	3	0	1	3	0	0	3	1
Female	46.05	>29 yr	married	Diploma degree	>29,999	Govt	Primary	general	37-48 hours	>5 years	Yes	Yes	No	No	0	3	1	0	0	1	2	1	1	4	2	2	1	2	1	4	4	1	4	4	3	4	4	4	3	0	2	2	0	1	3	3	0	1	5
Female	42	>29 yr	married	Master's degree or above	21,000-29,999	Govt	Tertiary	general	37-48 hours	>5 years	No	Yes	No	No	0	3	2	0	0	5	5	5	1	5	5	5	5	1	7	7	7	7	1	7	7	7	7	7	3	1	3	3	1	3	0	3	2	4	3
Female	22.9	<25 yr	married	Diploma degree	<21,000	Private	Primary	med	>48 hours	<3 years	Yes	Yes	Yes	No	0	3	2	3	2	3	2	4	2	5	5	4	2	3	4	5	4	1	4	3	5	6	1	3	3	1	0	2	0	3	0	2	0	3	4
Female	30	>29 yr	unmarried	Master's degree or above	21,000-29,999	Govt	Tertiary	criti	<37 hours	>5 years	No	Yes	No	No	0	3	3	0	0	1	3	3	3	2	3	3	3	2	5	3	5	4	4	4	5	5	4	4	1	1	2	2	1	1	1	1	2	2	4
Female	28.3	25-29 yr	unmarried	Master's degree or above	21,000-29,999	Govt	Tertiary	general	<37 hours	3-5 years	No	Yes	No	Yes	0	0	0	0	0	1	1	1	1	1	1	1	1	1	3	3	1	2	1	1	3	1	1	1	3	0	3	0	3	0	0	0	0	5	5
Female	38	>29 yr	married	Diploma degree	>29,999	Govt	Tertiary	gyn	<37 hours	>5 years	No	Yes	No	No	1	1	0	0	0	2	2	2	2	2	2	2	2	2	3	3	3	4	2	3	3	3	3		1	1	1	2	2	1	1	0	0	5	3
Female	28.6	25-29 yr	married	Bachelor's degree	21,000-29,999	Govt	Primary	gyn	<37 hours	>5 years	Yes	Yes	Yes	No	0	2	0	0	0	1	1	1	1	1	1	1	1	1	1	1	1	1	1	1	1	1	1	1	3	0	0	0	0	0	0	0	0	5	4
Female	22	<25 yr	unmarried	Diploma degree	21,000-29,999	Govt	Tertiary	criti	<37 hours	<3 years	Yes	Yes	No	Yes	0	0	0	0	0	1	1	1	1	1	2	2	2	1	1	1	1	1	1	1	1	1	3	1	3	0	0	0	1	1	1	0	0	5	5
Female	25.5	25-29 yr	unmarried	Diploma degree	<21,000	Private	Primary	criti	>48 hours	3-5 years	Yes	Yes	No	No	0	0	0	0	0	1	1	1	1	3	3	1	1	3	4	4	4	3	4	4	3	3	4	1	3	1	1	1	1	1	0	0	0	3	4
Female	35.2	>29 yr	married	Diploma degree	>29,999	Govt	Tertiary	surg	<37 hours	>5 years	No	Yes	Yes	No	0	2	1	0	0	2	2	3	4	4	4	2	2	3	4	4	3	4	4	3	3	3	3	3	2	1	1	1	1	1	0	0	0	4	3
Female	24	<25 yr	unmarried	Diploma degree	21,000-29,999	Govt	Tertiary	med	<37 hours	<3 years	No	Yes	No	No	1	2	0	0	0	2	2	1	3	2	2	2	2	1	4	2	3	2	3	2	3	2	3	2	1	0	1	1	1	0	1	1	1	5	4
Female	29	25-29 yr	married	Bachelor's degree	>29,999	Govt	Tertiary	surg	<37 hours	3-5 years	No	Yes	No	No	0	3	0	0	0	1	1	1	1	1	2	1	1	1	6	4	5	1	4	5	5	4	7	4	3	1	3	1	0	3	1	3	2	4	4
Female	33.3	>29 yr	married	Bachelor's degree	>29,999	Govt	Tertiary	criti	>48 hours	>5 years	No	Yes	No	No	0	3	3	0	0	4	2	2	2	2	2	2	4	2	4	4	4	2	3	4	3	2	3	1	2	1	1	1	1	1	0	0	1	4	5
Female	25	25-29 yr	unmarried	Bachelor's degree	<21,000	Private	Secondary	general	<37 hours	3-5 years	Yes	Yes	No	No	0	3	1	0	1	1	2	2	2	5	1	5	1	3	3	4	5	1	5	7	5	3	5	5	2	3	1	1	3	3	3	1	0	2	1
Female	28	25-29 yr	married	Diploma degree	<21,000	Private	Tertiary	gyn	<37 hours	3-5 years	Yes	Yes	Yes	Yes	2	0	0	0	0	1	1	1	1	1	1	1	1	1	1	1	1	1	1	1	1	1	1	1	0	0	0	0	1	0	0	0	0	1	5
Female	28	25-29 yr	unmarried	Master's degree or above	21,000-29,999	Govt	Tertiary	med	<37 hours	>5 years	No	Yes	No	No	0	2	0	0	0	5	2	1	1	1	2	1	2	1	5	4	4	1	5	6	4	4	7	5	1	2	3	1	1	0	1	1	2	2	1
Female	29.7	25-29 yr	married	Master's degree or above	21,000-29,999	Govt	Primary	general	37-48 hours	>5 years	No	No	No	No	0	3	3	0	0	2	2	1	1	2	2	2	1	1	4	4	4	1	4	4	3	1	6	3	1	2	0	2	0	2	3	0	1	2	3
Female	26	25-29 yr	married	Bachelor's degree	<21,000	Private	Secondary	med	<37 hours	<3 years	No	No	No	No	0	1	1	0	0	2	1	2	2	2	2	1	2	1	5	3	7	1	4	3	3	2	2	1	2	1	0	1	1	2	0	0	3	3	5
Female	27	25-29 yr	unmarried	Bachelor's degree	>29,999	Govt	Tertiary	surg	<37 hours	>5 years	Yes	Yes	Yes	Yes	0	0	0	0	0	1	1	1	1	1	1	1	1	1	2	2	2	1	2	2	2	1	2	2	1	1	1	1	1	0	0	0	0	4	1
Female	25.6	25-29 yr	married	Bachelor's degree	21,000-29,999	Govt	Tertiary	surg	<37 hours	3-5 years	No	Yes	No	No	0	2	0	0	0	1	1	1	2	1	1	2	1	1	3	1	4	1	4	4	1	1	4	1	2	0	0	1	0	0	0	0	0	5	5
Female	22.2	<25 yr	unmarried	Diploma degree	<21,000	Private	Primary	med	37-48 hours	<3 years	Yes	Yes	Yes	Yes	0	3	0	0	0	2	1	1	2	2	2	1	3	1	4	3	1	4	4	4	3	2	2	7	3	2	3	0	0	1	0	0	0	3	3
Female	26.2	25-29 yr	unmarried	Diploma degree	<21,000	Private	Tertiary	general	37-48 hours	>5 years	No	Yes	No	No	3	3	0	0	0	2	5	2	5	2	2	2	5	5	3	4	1	1	4	4	3	1	2	7	0	1	0	0	0	0	0	0	0	1	1
Female	26	25-29 yr	unmarried	Diploma degree	21,000-29,999	Private	Tertiary	criti	>48 hours	3-5 years	Yes	Yes	No	Yes	0	0	0	0	0	1	1	1	1	1	1	1	1	1	1	1	1	1	1	1	1	1	1	1	0	0	0	0	0	0	0	0	0	1	1
Female	25	25-29 yr	unmarried	Diploma degree	<21,000	Private	Primary	gyn	<37 hours	>5 years	No	Yes	No	No	0	1	0	0	0	1	1	1	1	1	5	5	5	1	1	1	1	1	1	1	1	1	1	1	3	0	0	0	0	3	3	0	0	5	5
Female	23	<25 yr	unmarried	Diploma degree	<21,000	Govt	Secondary	general	37-48 hours	<3 years	Yes	Yes	Yes	Yes	1	0	0	0	0	1	1	1	2	2	2	3	2	2	3	4	3	1	3	4	4	6	3	2	3	3	0	1	1	0	2	2	0	4	1
Female	28	25-29 yr	married	Diploma degree	21,000-29,999	Govt	Tertiary	med	37-48 hours	<3 years	Yes	Yes	No	No	0	0	0	0	0	2	1	2	1	1	1	2	2	1	2	1	1	1	2	2	2	1	1	1	1	1	1	1	2	0	1	0	1	4	4
Female	34.7	>29 yr	married	Bachelor's degree	>29,999	Govt	Tertiary	gyn	<37 hours	>5 years	No	Yes	No	No	0	0	2	0	0	2	2	2	3	4	2	2	2	2	3	3	3	3	3	3	3	3	3	3	2	1	0	0	0	1	1	0	0	4	3
Female	24	<25 yr	unmarried	Bachelor's degree	<21,000	Private	Tertiary	surg	<37 hours	<3 years	No	No	No	No	0	3	0	0	0	2	2	1	2	5	5	2	2	2	2	4	7	1	7	7	2	3	7	1	2	3	3	1	2	2	1	1	0	2	3
Female	33	>29 yr	married	Bachelor's degree	>29,999	Govt	Tertiary	criti	37-48 hours	>5 years	Yes	Yes	No	No	0	1	0	0	0	2	2	2	2	2	2	2	2	2	1	3	4	3	3	3	1	3	3	3	3	0	0	0	0	0	0	0	0	4	4
Female	34	>29 yr	married	Diploma degree	>29,999	Govt	Tertiary	em	37-48 hours	>5 years	Yes	Yes	Yes	No	1	0	1	0	0	3	3	2	3	3	3	3	2	2	7	7	5	4	3	4	5	4	5	2	2	3	3	1	0	1	0	1	1	4	3
Female	23.4	<25 yr	unmarried	Diploma degree	<21,000	Private	Primary	general	37-48 hours	<3 years	Yes	Yes	No	No	0	3	0	0	0	2	2	3	2	4	4	2	2	2	4	3	4	5	7	5	4	5	5	1	3	3	3	2	2	1	2	3	1	4	5
Female	35	>29 yr	married	Bachelor's degree	>29,999	Govt	Tertiary	surg	<37 hours	>5 years	No	Yes	No	No	0	1	0	0	0	1	2	2	1	1	2	1	1	1	1	1	1	1	1	2	1	1	2	1	1	1	0	0	0	0	0	0	0	3	2
Female	26.5	25-29 yr	unmarried	Master's degree or above	21,000-29,999	Govt	Tertiary	surg	<37 hours	3-5 years	Yes	Yes	Yes	No	0	0	0	0	0	1	2	1	1	5	5	1	1	1	7	4	4	3	2	2	1	1	2	2	2	2	0	2	1	0	0	1	0	4	4
Female	23	<25 yr	unmarried	Diploma degree	<21,000	Private	Tertiary	general	37-48 hours	<3 years	Yes	Yes	No	Yes	0	3	3	0	0	2	5	3	3	4	5	3	4	4	4	4	3	3	4	7	3	3	7	3	2	2	2	1	2	1	2	0	3	2	1
Female	25	25-29 yr	married	Diploma degree	<21,000	Private	Primary	criti	<37 hours	3-5 years	Yes	Yes	Yes	Yes	1	1	1	1	1	2	1	1	1	1	1	1	1	1	1	2	2	2	2	1	3	1	1	1	1	1	1	1	2	0	0	0	0	2	2
Female	28	25-29 yr	married	Bachelor's degree	21,000-29,999	Govt	Tertiary	criti	<37 hours	3-5 years	Yes	Yes	Yes	No	0	0	0	0	0	2	2	2	2	2	3	2	3	2	3	3	3	3	2	4	3	3	4	2	2	1	2	2	1	1	1	1	0	3	4
Female	23.2	<25 yr	unmarried	Diploma degree	<21,000	Private	Tertiary	med	37-48 hours	<3 years	Yes	Yes	No	Yes	0	1	1	0	0	1	1	1	1	1	2	1	1	1	4	2	3	3	3	1	4	1	4	1	2	1	1	1	1	0	1	0	0	4	4
Female	31.2	>29 yr	married	Bachelor's degree	>29,999	Govt	Tertiary	med	<37 hours	>5 years	Yes	Yes	No	No	0	1	0	0	0	2	2	2	2	2	3	2	4	2	4	4	4	5	5	5	5	2	3	3	1	1	1	1	1	1	1	1	1	3	3
Female	23	<25 yr	married	Diploma degree	<21,000	Private	Secondary	general	37-48 hours	<3 years	Yes	Yes	No	No	3	3	3	0	0	1	1	1	1	1	1	1	1	1	4	3	3	3	4	4	3	4	3	4	2	1	2	1	1	3	0	0	0	2	2
Female	40	>29 yr	married	Bachelor's degree	>29,999	Govt	Tertiary	general	<37 hours	>5 years	No	Yes	No	No	1	1	0	0	0	2	2	2	2	2	2	2	2	2	5	3	4	2	2	4	2	3	3	3	1	1	2	2	1	1	1	1	1	2	4
Female	24	<25 yr	unmarried	Diploma degree	>29,999	Private	Tertiary	criti	37-48 hours	<3 years	Yes	Yes	Yes	No	0	0	0	0	0	1	1	1	1	1	3	1	1	1	1	1	1	1	1	1	1	1	1	1	3	0	3	1	0	0	1	0	0	5	1
Female	26.8	25-29 yr	married	Diploma degree	21,000-29,999	Govt	Tertiary	med	37-48 hours	<3 years	Yes	Yes	No	No	0	0	0	0	0	2	1	2	1	1	1	2	2	1	2	1	1	1	2	2	2	1	1	1	1	1	1	1	1	0	1	0	0	4	4
Female	26	25-29 yr	unmarried	Bachelor's degree	21,000-29,999	Govt	Tertiary	med	37-48 hours	<3 years	No	Yes	No	No	0	3	3	0	0	5	5	5	5	5	5	5	5	5	7	5	7	1	7	1	1	7	1	1	0	0	0	0	0	3	3	3	3	1	1
Female	26	25-29 yr	married	Diploma degree	<21,000	Private	Tertiary	general	37-48 hours	3-5 years	Yes	No	No	No	0	0	0	0	0	1	2	2	1	2	2	1	2	1	4	4	1	1	1	1	4	1	7	1	1	0	3	2	3	0	3	0	0	4	3
Female	34.2	>29 yr	married	Master's degree or above	>29,999	Govt	Tertiary	med	<37 hours	>5 years	No	Yes	No	No	0	3	3	1	0	2	4	3	4	3	4	2	4	3	5	6	6	4	6	5	2	3	5	3	1	2	2	2	2	1	2	2	2	4	4
Female	27	25-29 yr	married	Bachelor's degree	>29,999	Govt	Tertiary	med	<37 hours	3-5 years	No	Yes	Yes	No	0	2	2	0	0	2	3	3	4	4	4	2	2	3	4	4	4	4	4	4	4	2	3	2	1	2	1	1	1	1	1	1	1	4	3
Female	25.4	25-29 yr	unmarried	Bachelor's degree	>29,999	Private	Tertiary	general	<37 hours	<3 years	No	No	No	No	0	0	0	0	0	2	1	1	1	1	1	2	1	1	4	4	4	1	3	4	4	4	7	3	2	1	3	1	3	0	3	0	0	4	3
Female	50	>29 yr	married	Bachelor's degree	>29,999	Govt	Tertiary	criti	<37 hours	>5 years	Yes	Yes	Yes	No	0	0	0	0	0	2	2	2	2	1	2	2	2	2	7	7	6	2	3	6	7	3	4	3	1	1	1	1	3	1	1	1	2	5	5
Female	24	<25 yr	unmarried	Bachelor's degree	<21,000	Private	Tertiary	surg	37-48 hours	<3 years	No	No	No	No	0	0	0	0	0	1	1	1	1	2	1	1	1	1	4	1	6	1	2	7	3	3	6	2	2	3	2	3	3	3	2	0	0	4	4
Female	26	25-29 yr	unmarried	Diploma degree	21,000-29,999	Private	Primary	general	>48 hours	<3 years	Yes	No	No	No	0	3	2	1	0	2	2	1	2	1	3	2	2	2	4	3	3	1	2	2	4	4	6	1	1	2	2	3	3	3	3	0	2	1	1
Female	29.7	25-29 yr	unmarried	Bachelor's degree	21,000-29,999	Govt	Tertiary	surg	<37 hours	>5 years	Yes	Yes	Yes	No	0	2	1	0	0	2	2	1	2	2	2	1	2	2	4	4	3	3	3	3	2	2	4	6	1	1	0	0	0	0	0	1	1	4	3
Female	26.3	25-29 yr	married	Diploma degree	<21,000	Private	Tertiary	gyn	>48 hours	<3 years	No	Yes	No	No	0	0	0	0	0	2	1	1	1	3	1	1	1	1	7	5	1	1	1	1	4	3	1	2	2	1	0	0	1	0	0	0	0	4	4
Female	37.7	>29 yr	married	Bachelor's degree	>29,999	Govt	Tertiary	surg	<37 hours	>5 years	No	Yes	Yes	No	0	2	0	0	0	2	2	2	2	2	2	2	2	2	3	3	3	3	3	3	2	2	3	3	2	1	0	0	0	1	0	1	1	3	3
Female	25	25-29 yr	married	Bachelor's degree	21,000-29,999	Private	Tertiary	med	37-48 hours	<3 years	Yes	No	No	No	0	0	1	0	0	2	2	1	2	2	2	2	2	1	4	4	4	1	3	2	2	2	5	3	3	1	1	1	0	1	1	0	1	3	3
Female	23	<25 yr	unmarried	Diploma degree	<21,000	Private	Tertiary	em	37-48 hours	3-5 years	Yes	No	No	No	0	3	0	0	0	1	1	1	1	1	1	1	1	1	3	1	1	1	2	2	3	1	7	1	3	0	0	0	0	0	0	0	0	3	4
Female	24.5	<25 yr	unmarried	Bachelor's degree	21,000-29,999	Private	Tertiary	gyn	>48 hours	<3 years	Yes	Yes	No	Yes	0	1	0	0	0	2	2	2	3	2	2	2	2	2	2	3	4	3	4	3	2	1	1	2	2	2	0	0	0	0	0	0	0	3	3
Female	23	<25 yr	unmarried	Diploma degree	<21,000	Private	Secondary	general	37-48 hours	<3 years	Yes	Yes	No	No	0	0	0	0	0	1	1	1	1	1	1	2	1	1	4	2	1	1	1	1	2	1	2	1	1	1	1	1	1	0	0	0	0	2	2
Female	28	25-29 yr	unmarried	Master's degree or above	21,000-29,999	Govt	Tertiary	med	<37 hours	3-5 years	No	Yes	No	No	0	3	0	2	0	2	3	1	5	3	3	3	1	2	2	3	1	7		1	2	1	1	7	3	2	0	0	0	2	2	0	0	3	2
Female	26	25-29 yr	married	Master's degree or above	21,000-29,999	Govt	Tertiary	criti	37-48 hours	<3 years	No	Yes	No	No	0	1	0	0	0	5	2	1	1	1	2	1	1	1	4	6	3	1	1	4	6	1	7	1	1	1	1	2	1	0	3	0	0	4	4
Female	26.8	25-29 yr	unmarried	Bachelor's degree	>29,999	Private	Primary	gyn	37-48 hours	<3 years	Yes	Yes	No	Yes	0	3	0	0	0	5	4	3	5	4	2	2	3	2	4	4	4	1	4	3	4	1	1	4	3	0	0	0	0	0	0	0	0	4	4
Female	22.4	<25 yr	unmarried	Diploma degree	<21,000	Private	Primary	general	>48 hours	<3 years	No	No	No	No	0	0	0	1	0	3	2	1	1	2	1	1	2	2	5	2	4	1	3	5	3	4	4	6	2	1	3	0	0	1	0	1	0	2	2
Female	27	25-29 yr	married	Diploma degree	21,000-29,999	Govt	Tertiary	med	37-48 hours	3-5 years	No	Yes	No	No	0	3	0	0	0	1	1	1	1	1	1	1	2	1	1	4	3	1	1	3	2	1	7	1	1	1	1	0	1	1	0	0	0	3	4
Female	40.4	>29 yr	married	Master's degree or above	>29,999	Govt	Secondary	general	37-48 hours	>5 years	No	Yes	No	No	0	3	2	0	0	3	4	4	2	3	2	2	2	2	6	7	4	5	4	3	4	3	5	1	2	2	1	1	1	0	1	1	0	4	4
Female	34.9	>29 yr	married	Bachelor's degree	>29,999	Govt	Tertiary	gyn	<37 hours	>5 years	No	Yes	No	No	0	2	0	0	0	2	2	3	2	4	4	2	4	3	3	3	4	4	4	3	3	2	2	3	1	1	1	1	1	1	1	1	1	2	2
Female	34.5	>29 yr	married	Master's degree or above	>29,999	Govt	Tertiary	surg	<37 hours	>5 years	No	Yes	No	No	2	2	1	3	0	3	3	2	3	3	4	3	3	2	4	3	3	3	4	4	3	3	4	2	0	2	0	1	1	2	1	2	1	3	3
Female	26	25-29 yr	unmarried	Bachelor's degree	<21,000	Private	Tertiary	general	<37 hours	<3 years	Yes	Yes	No	No	0	0	0	0	0	1	1	3	1	2	4	1	1	3	4	3	1	5	1	3	1	5	1	1	3	0	0	1	1	0	0	1	0	3	3
Female	25.5	25-29 yr	unmarried	Bachelor's degree	<21,000	Private	Tertiary	gyn	>48 hours	<3 years	No	Yes	No	No	1	1	0	0	0	1	1	1	1	2	1	1	1	1	2	2	2	1	1	2	1	1	2	2	2	1	1	1	1	2	1	0	0	4	4
Female	26.5	25-29 yr	married	Master's degree or above	>29,999	Govt	Tertiary	criti	>48 hours	3-5 years	Yes	Yes	Yes	Yes	0	3	3	0	0	1	1	2	2	1	2	2	2	2	6	6	5	2	6	6	5	5	7	6	3	3	2	2	3	3	1	3	3	5	4
Female	35	>29 yr	married	Master's degree or above	21,000-29,999	Govt	Tertiary	surg	<37 hours	3-5 years	No	Yes	Yes	Yes	0	1	0	0	0	1	1	1	1	1	1	1	1	1	1	1	1	1	1	1	1	1	1	1	3	0	1	0	0	0	0	0	0	5	5
Female	24	<25 yr	unmarried	Diploma degree	<21,000	Private	Tertiary	med	<37 hours	3-5 years	Yes	No	Yes	Yes	0	0	0	0	0	1	1	1	1	1	1	1	1	1	3	1	1	1	4	3	4	1	7	1	3	0	0	0	2	2	1	1	2	3	5
Female	26.2	25-29 yr	unmarried	Diploma degree	<21,000	Private	Tertiary	criti	<37 hours	<3 years	Yes	Yes	Yes	Yes	1	1	1	0	0	1	1	2	1	2	2	2	1	2	5	4	4	3	5	5	3	4	5	6	3	1	1	1	0	2	0	1	0	1	3
Female	29.5	25-29 yr	married	Bachelor's degree	>29,999	Govt	Tertiary	criti	>48 hours	3-5 years	Yes	Yes	No	No	0	1	1	0	0	2	1	2	2	2	2	2	2	2	3	2	3	1	2	2	2	2	2	2	0	0	0	0	1	1	1	1	1	1	1
Female	27	25-29 yr	married	Diploma degree	21,000-29,999	Govt	Tertiary	med	37-48 hours	<3 years	No	Yes	Yes	No	0	0	0	1	0	2	1	2	1	1	1	2	2	1	2	1	1	1	1	2	1	1	1	1	1	1	1	1	1	0	1	0	0	4	4
Female	34	>29 yr	married	Bachelor's degree	>29,999	Govt	Tertiary	criti	37-48 hours	>5 years	Yes	Yes	No	No	3	1	1	1	0	2	2	2	2	2	2	2	2	2	3	3	3	3	3	3	3	1	3	3	3	0	3	0	1	0	0	0	0	4	4
Female	23.2	<25 yr	unmarried	Diploma degree	>29,999	Private	Secondary	gyn	37-48 hours	<3 years	Yes	Yes	No	No	0	0	0	0	0	1	1	1	1	2	1	4	1	1	4	3	3	1	1	4	1	1	4	1	3	1	0	1	1	1	0	0	1	5	5
Female	25	25-29 yr	married	Diploma degree	<21,000	Private	Secondary	general	37-48 hours	3-5 years	Yes	Yes	No	No	0	0	0	0	0	1	1	1	1	1	1	1	1	1	3	2	2	1	1	1	1	1	5	1	1	0	1	1	1	0	0	0	0	4	4
Female	28	25-29 yr	unmarried	Master's degree or above	21,000-29,999	Govt	Tertiary	criti	<37 hours	3-5 years	Yes	Yes	No	No	0	3	1	3	0	1	2	1	1	1	1	2	2	2	4	5	7	3	5	7	3	6	7	1	2	3	0	0	1	3	3	0	0	3	5
Female	25	25-29 yr	married	Bachelor's degree	21,000-29,999	Private	Tertiary	criti	<37 hours	3-5 years	Yes	Yes	No	No	0	1	0	0	0	1	1	2	1	2	2	1	2	1	4	3	4	1	1	4	4	1	1	1	3	0	0	1	0	0	0	0	0	4	4
Female	31	>29 yr	married	Bachelor's degree	>29,999	Govt	Tertiary	criti	<37 hours	>5 years	Yes	Yes	No	No	0	0	0	0	0	1	1	2	1	1	2	1	1	1	4	3	3	1	1	1	3	2	5	1	3	0	1	1	0	0	0	0	0	4	4
Female	30	>29 yr	married	Diploma degree	>29,999	Govt	Tertiary	criti	37-48 hours	>5 years	No	Yes	No	No	0	0	0	0	0	2	2	3	2	2	2	3	2	2	7	3	3	1	2	2	2	2	2	2	0	1	1	1	1	1	2	1	1	5	5
Female	27.3	25-29 yr	unmarried	Master's degree or above	21,000-29,999	Govt	Tertiary	med	<37 hours	3-5 years	No	Yes	No	No	2	1	1	0	0	2	4	3	2	2	4	2	2	2	4	3	4	5	4	5	4	2	3	3	2	2	1	2	1	1	1	1	0	3	4
Female	27.4	25-29 yr	married	Bachelor's degree	21,000-29,999	Private	Primary	med	37-48 hours	>5 years	Yes	Yes	Yes	No	0	3	1	0	0	1	2	3	2	5	2	1	1	1	4	1	4	1	3	5	3	1	1	1	2	1	1	1	1	0	0	0	0	4	4
Female	30	>29 yr	married	Diploma degree	>29,999	Govt	Secondary	med	37-48 hours	3-5 years	No	Yes	No	No	1	3	0	0	0	2	2	1	2	1	2	2	2	2	3	2	1	1	4	4	1	4	1	1	3	0	2	1	1	1	1	0	0	5	5
Female	33	>29 yr	married	Bachelor's degree	>29,999	Govt	Tertiary	surg	<37 hours	>5 years	No	Yes	Yes	No	0	1	2	0	0	1	1	1	2	2	4	2	2	1	4	4	3	2	3	3	3	3	3	4	1	0	0	0	0	0	0	0	1	4	4
Female	28.8	25-29 yr	married	Bachelor's degree	21,000-29,999	Govt	Tertiary	med	<37 hours	3-5 years	No	Yes	No	No	0	2	2	0	0	3	4	3	2	4	4	2	4	2	6	6	6	5	5	6	6	6	7	4	2	2	1	1	3	1	1	2	2	3	3
Female	24	<25 yr	unmarried	Diploma degree	<21,000	Private	Secondary	med	37-48 hours	<3 years	Yes	Yes	No	No	0	0	0	0	0	1	1	1	1	1	1	2	2	1	3	2	2	1	1	1	2	1	6	1	1	1	2	1	2	0	0	0	0	4	2
Female	29.5	25-29 yr	married	Master's degree or above	21,000-29,999	Govt	Secondary	general	<37 hours	>5 years	Yes	Yes	No	No	0	2	0	0	0	2	1	1	1	1	2	1	1	2	4	4	4	1	4	5	3	3	4	1	2	1	2	1	2	0	0	0	0	4	4
Female	29.2	25-29 yr	unmarried	Master's degree or above	21,000-29,999	Govt	Tertiary	med	37-48 hours	>5 years	No	Yes	No	No	3	3	3	3	2	2	5	5	5	5	5	4	5	5	4	5	7	4	7	7	5	7	6	6	0	3	3	3	3	3	3	1	3	1	1
Female	40	>29 yr	married	Bachelor's degree	21,000-29,999	Govt	Primary	med	37-48 hours	>5 years	No	Yes	No	No	0	1	0	0	0	2	1	2	1	2	2	1	2	1	3	1	1	1	3	3	3	1	4	1	3	0	0	1	0	1	0	0	0	4	5
Female	23	<25 yr	unmarried	Diploma degree	21,000-29,999	Private	Tertiary	criti	<37 hours	3-5 years	Yes	Yes	No	No	0	3	0	0	0	1	1	1	1	1	1	1	1	1	7	7	7	1	1	1	3	1	1	1	1	1	0	1	0	0	1	0	0	4	1
Female	26	25-29 yr	married	Diploma degree	21,000-29,999	Govt	Tertiary	surg	<37 hours	<3 years	Yes	Yes	No	No	0	0	0	0	0	1	1	1	1	1	2	1	1	1	4	1	1	1	1	1	3	1	3	1	3	0	0	0	0	0	0	0	0	5	5
Female	25.3	25-29 yr	unmarried	Bachelor's degree	21,000-29,999	Private	Tertiary	med	37-48 hours	<3 years	No	No	No	No	0	0	0	0	0	1	1	1	1	1	2	1	1	1	1	1	1	2	1	1	1	1	1	1	3	1	0	0	0	1	0	0	0	5	5
Female	26	25-29 yr	married	Diploma degree	<21,000	Private	Tertiary	gyn	37-48 hours	3-5 years	Yes	Yes	Yes	Yes	0	0	0	0	0	1	1	1	1	1	1	1	1	1	2	2	1	1	2	1	1	1	1	1	1	0	1	0	0	1	1	1	1	1	1
Female	46.4	>29 yr	married	Master's degree or above	>29,999	Govt	Tertiary	surg	<37 hours	>5 years	No	Yes	Yes	No	1	1	1	0	0	2	2	2	2	2	2	2	2	1	2	2	1	1	1	2	5	1	3	1	2	0	1	2	2	0	0	0	0	4	3
Female	31.2	>29 yr	married	Bachelor's degree	>29,999	Govt	Tertiary	med	<37 hours	>5 years	No	Yes	No	No	1	2	0	0	0	4	3	3	4	3	5	5	5	2	4	4	3	3	4	4	2	2	2	3	1	1	1	1	1	1	1	1	1	3	3
Female	26.5	25-29 yr	unmarried	Diploma degree	21,000-29,999	Govt	Tertiary	criti	37-48 hours	<3 years	Yes	Yes	No	No	0	1	0	0	0	2	2	1	5	2	5	2	2	2	3	3	4	4	4	3	4	3	5	1	3	3	2	1	0	0	0	2	0	5	5
Female	29.5	25-29 yr	married	Master's degree or above	>29,999	Govt	Tertiary	general	<37 hours	3-5 years	No	Yes	No	No	0	2	1	1	1	1	1	1	1	1	1	1	1	2	4	3	3	2	1	4	4	1	4	1	3	1	1	2	1	1	1	0	0	4	5
Female	26	25-29 yr	unmarried	Bachelor's degree	<21,000	Private	Tertiary	criti	<37 hours	3-5 years	No	Yes	No	No	0	3	3	0	0	2	2	3	1	4	2	1	1	2	6	5	3	2	4	2	2	2	2	2	2	1	2	2	0	0	1	1	0	1	1
Female	24.9	<25 yr	unmarried	Bachelor's degree	21,000-29,999	Govt	Tertiary	gyn	<37 hours	<3 years	Yes	Yes	Yes	Yes	0	0	0	0	0	1	1	2	1	1	2	1	1	1	5	4	1	1	1	1	4	1	4	1	3	0	1	1	0	0	0	0	0	5	5
Female	29	25-29 yr	unmarried	Diploma degree	21,000-29,999	Govt	Tertiary	surg	<37 hours	3-5 years	No	Yes	No	No	1	1	0	0	0	1	2	2	1	2	2	2	2	1	3	1	2	1	2	4	2	2	2	2	0	1	0	0	0	0	0	1	0	1	4
Female	28	25-29 yr	married	Diploma degree	21,000-29,999	Govt	Tertiary	surg	37-48 hours	3-5 years	Yes	Yes	No	No	0	0	0	0	0	1	1	1	1	1	1	1	1	1	4	4	3	1	1	1	1	1	1	1	3	0	0	0	0	0	0	0	1	3	5
Female	28	25-29 yr	married	Bachelor's degree	21,000-29,999	Govt	Tertiary	gyn	<37 hours	3-5 years	No	Yes	No	No	0	0	0	0	0	1	1	1	1	3	1	1	1	1	2	1	2	1	1	1	1	1	2	1	3	0	0	0	0	0	0	0	0	4	4
Female	23.3	<25 yr	unmarried	Diploma degree	<21,000	Private	Tertiary	general	>48 hours	<3 years	Yes	Yes	No	Yes	0	1	2	2	2	2	3	4	4	4	4	3	3	3	5	5	3	4	5	5	3	4	6	5	3	2	2	1	1	1	3	0	0	4	3
Female	25.2	25-29 yr	unmarried	Bachelor's degree	21,000-29,999	Govt	Tertiary	med	37-48 hours	<3 years	No	Yes	Yes	No	0	0	1	0	0	1	1	1	1	2	1	1	2	1	3	1	2	1	1	1	3	1	2	1	3	0	1	1	1	0	1	1	0	4	3
Female	33	>29 yr	married	Bachelor's degree	>29,999	Govt	Tertiary	surg	<37 hours	>5 years	No	Yes	No	No	0	2	1	0	0	2	2	2	2	2	2	2	2	2	5	5	5	5	5	5	4	4	4	3	2	0	1	0	0	0	0	0	0	3	3
Female	32.8	>29 yr	married	Bachelor's degree	>29,999	Govt	Tertiary	med	<37 hours	>5 years	No	Yes	Yes	No	0	1	0	0	0	2	2	1	3	2	3	1	2	2	5	5	5	4	4	5	4	3	3	5	1	1	0	0	0	0	1	0	0	2	2
Female	22	<25 yr	unmarried	Diploma degree	<21,000	Private	Tertiary	criti	>48 hours	<3 years	Yes	Yes	Yes	Yes	0	0	0	0	0	1	1	1	2	2	2	2	2	2	4	4	4	1	4	4	4	4	4	1	2	3	1	1	0	3	1	3	1	4	4
Female	34	>29 yr	married	Diploma degree	21,000-29,999	Govt	Tertiary	general	>48 hours	<3 years	No	Yes	No	No	0	3	0	0	0	1	1	2	1	1	2	1	1	1	4	4	3	1	3	5	4	1	3	1	1	1	0	1	0	0	0	0	0	5	5
Female	27.3	25-29 yr	married	Diploma degree	>29,999	Govt	Tertiary	surg	<37 hours	3-5 years	No	Yes	No	No	0	3	1	0	0	4	4	2	3	3	5	2	5	4	2	3	3	1	3	2	1	1	2	2	2	2	2	0	0	1	0	1	1	2	2
Female	26	25-29 yr	unmarried	Master's degree or above	21,000-29,999	Govt	Tertiary	med	<37 hours	3-5 years	Yes	Yes	No	Yes	0	0	0	0	0	1	1	1	1	1	1	1	1	1	1	1	1	1	1	1	3	1	4	1	3	0	1	0	0	1	0	0	0	4	4
Female	24	<25 yr	unmarried	Diploma degree	<21,000	Private	Secondary	gyn	37-48 hours	>5 years	Yes	Yes	No	No	0	3	0	0	0	2	1	1	4	2	3	4	1	1	7	4	7	7	4	4	6	1	7	1	2	3	2	3	2	3	3	3	0	5	5
Female	27.6	25-29 yr	married	Diploma degree	21,000-29,999	Govt	Tertiary	surg	<37 hours	3-5 years	No	Yes	No	No	0	1	2	1	0	2	2	2	2	2	5	2	3	3	5	5	5	4	6	6	2	6	7	4	0	1	1	0	0	1	1	2	2	2	2
Female	25	25-29 yr	married	Bachelor's degree	<21,000	Private	Tertiary	med	>48 hours	3-5 years	No	Yes	No	No	0	0	0	0	0	2	1	1	1	1	1	2	1	1	1	1	1	1	7	7		1	1	1	3	0	0	3	0	3	0	0	0	2	1
Female	24	<25 yr	unmarried	Diploma degree	<21,000	Private	Tertiary	general	37-48 hours	<3 years	Yes	Yes	No	No	0	0	0	0	0	1	1	1	1	1	2	1	1	1	3	1	1	1	4	2	4	1	4	1	3	0	0	1	2	0	1	0	0	4	2
Female	27.8	25-29 yr	married	Master's degree or above	21,000-29,999	Govt	Tertiary	surg	<37 hours	3-5 years	No	Yes	Yes	No	0	1	1	0	0	2	2	1	2	1	2	2	2	1	3	3	2	2	2	2	2	2	2	3	1	1	1	1	1	2	0	1	1	2	2
Female	27.8	25-29 yr	unmarried	Bachelor's degree	21,000-29,999	Govt	Tertiary	criti	37-48 hours	3-5 years	No	Yes	No	No	0	1	0	0	0	1	1	1	2	2	2	1	1	1	4	4	2	1	2	3	4	1	7	1	2	1	2	1	1	0	1	0	0	4	4
Female	24	<25 yr	married	Diploma degree	<21,000	Private	Secondary	criti	37-48 hours	<3 years	Yes	Yes	No	No	2	3	3	1	0	1	1	2	2	5	2	1	1	3	6	4	3	6	4	4	5	4	7	3	3	1	1	1	2	1	3	0	0	2	3
Female	29.7	25-29 yr	married	Bachelor's degree	>29,999	Govt	Tertiary	surg	<37 hours	>5 years	No	Yes	Yes	No	0	0	0	0	0	2	3	3	3	4	3	2	2	2	4	4	4	4	4	4	4	4	4	3	1	1	1	1	1	0	1	1	1	3	4
Female	28	25-29 yr	married	Bachelor's degree	>29,999	Govt	Tertiary	gyn	37-48 hours	3-5 years	Yes	Yes	No	No	0	3	0	0	0	2	2	2	2	2	1	2	2	2	1	1	1	1	7	7	1	1	7	1	3	0	0	0	0	3	0	0	0	5	5
Female	54.5	>29 yr	married	Master's degree or above	>29,999	Govt	Secondary	general	37-48 hours	>5 years	Yes	Yes	No	No	0	0	0	0	0	2	2	2	1	2	1	2	1	1	4	3	1	1	1	1	4	1	1	1	3	1	0	1	1	0	0	0	0	2	3
Female	40	>29 yr	married	Bachelor's degree	>29,999	Govt	Tertiary	criti	<37 hours	>5 years	No	Yes	No	No	1	1	0	0	0	2	2	2	2	2	2	2	2	2	5	3	4	2	2	2	4	2	3	3	1	1	2	2	1	1	1	1	1	2	4
Female	28	25-29 yr	married	Bachelor's degree	21,000-29,999	Govt	Secondary	gyn	<37 hours	3-5 years	No	No	No	No	0	3	2	1	0	2	1	3	1	3	1	2	2	2	6	6	5	4	5	6	4	6	4	7	0	3	1	2	0	2	0	0	1	2	1
Female	36	>29 yr	married	Bachelor's degree	>29,999	Govt	Tertiary	em	<37 hours	>5 years	No	Yes	No	No	1	1	0	0	0	2	1	2	2	2	2	3	2	2	7	5	4	1	2	2	3	2	3	2	1	0	3	0	0	0	1	1	1	5	5
Female	25	25-29 yr	unmarried	Diploma degree	21,000-29,999	Govt	Secondary	med	<37 hours	3-5 years	Yes	Yes	No	No	0	0	0	0	0	1	1	1	1	1	1	1	1	1	1	1	1	1	1	1	1	1	1	1	3	0	3	0	0	3	0	0	0	5	5
Female	29	25-29 yr	unmarried	Bachelor's degree	>29,999	Govt	Tertiary	criti	37-48 hours	3-5 years	Yes	Yes	No	No	0	3	3	0	0	2	2	2	1	3	3	3	3	3	3	3	3	1	5	5	5	4	2	2	2	2	2	2	2	2	2	2	2	3	5
Female	29	25-29 yr	married	Diploma degree	21,000-29,999	Govt	Tertiary	surg	<37 hours	3-5 years	Yes	Yes	Yes	Yes	0	0	0	0	0	1	1	1	1	1	2	2	3	1	2	1	1	1	1	2	7	1	1	1	3	0	1	0	0	0	0	0	0	5	5
Female	26.2	25-29 yr	unmarried	Bachelor's degree	21,000-29,999	Govt	Secondary	general	<37 hours	3-5 years	No	Yes	No	No	0	1	0	0	0	1	2	1	2	2	2	1	5	5	4	4	3	1	4	3	3	1	4	1	2	0	0	0	0	0	0	0	0	3	3
Female	45	>29 yr	married	Bachelor's degree	>29,999	Govt	Tertiary	surg	<37 hours	>5 years	No	Yes	Yes	No	0	2	2	0	0	3	3	3	3	3	3	2	2	2	3	3	3	3	3	3	3	3	3	2	1	1	0	0	0	0	0	1	0	4	3
Female	28	25-29 yr	unmarried	Bachelor's degree	>29,999	Govt	Tertiary	criti	37-48 hours	3-5 years	Yes	Yes	No	No	1	1	0	0	0	1	1	1	1	1	1	1	1	1	3	2	1	1	1	1	1	1	1	1	2	1	3	0	0	0	0	0	0	5	5
Female	25.4	25-29 yr	unmarried	Bachelor's degree	21,000-29,999	Private	Secondary	med	37-48 hours	<3 years	Yes	Yes	No	Yes	0	0	0	0	0	1	2	2	1	1	4	1	2	1	3	3	2	4	1	2	3	1	1	1	3	0	0	0	0	1	0	0	0	4	4
Female	47	>29 yr	married	Diploma degree	>29,999	Govt	Primary	general	>48 hours	>5 years	Yes	Yes	No	Yes	0	3	0	0	0	2	2	2	2	2	2	2	2	2	4	4	4	4	4	4	3	3	5	3	3	2	3	2	0	2	2	2	3	5	5
Female	33.2	>29 yr	married	Bachelor's degree	>29,999	Govt	Tertiary	surg	<37 hours	>5 years	No	Yes	No	No	0	1	1	1	1	2	2	1	1	2	3	2	4	3	2	2	3	3	3	3	2	2	2	3	1	2	1	1	1	1	1	1	1	3	3
Female	28.7	25-29 yr	married	Bachelor's degree	>29,999	Govt	Tertiary	med	<37 hours	3-5 years	Yes	Yes	Yes	No	0	2	0	0	0	2	2	2	3	3	3	2	2	3	4	4	4	4	4	5	5	5	5	4	1	1	2	1	2	2	2	2	1	4	3
Female	27	25-29 yr	unmarried	Master's degree or above	21,000-29,999	Govt	Tertiary	med	37-48 hours	3-5 years	No	Yes	No	No	0	3	2	0	1	2	1	2	2	2	4	2	2	2	6	6	7	3	4	3	3	3	6	5	3	2	2	2	3	2	2	0	0	4	4
Female	27	25-29 yr	married	Master's degree or above	>29,999	Govt	Tertiary	general	37-48 hours	3-5 years	Yes	Yes	No	No	0	0	0	0	0	2	5	5	2	5	5	1	5	5	7	7	7	1	7	7	4	6	1	6	0	3	0	2	3	3	0	0	0	1	1
Female	23	<25 yr	married	Diploma degree	<21,000	Private	Tertiary	criti	<37 hours	3-5 years	Yes	Yes	No	Yes	0	1	0	1	0	2	5	1	5	4	2	1	4	3	5	5	5	5	5	1	4	6	7	4	1	2	2	2	2	1	3	2	0	3	2
Female	24.5	<25 yr	married	Bachelor's degree	<21,000	Private	Tertiary	med	<37 hours	3-5 years	No	Yes	No	No	0	0	0	0	0	1	1	1	1	1	1	1	1	1	1	1	1	1	1	1	1	1	1	1	3	0	0	0	0	0	0	0	0	5	5
Female	49	>29 yr	married	Bachelor's degree	>29,999	Govt	Tertiary	gyn	37-48 hours	>5 years	Yes	Yes	No	No	0	3	0	0	0	2	2	2	2	2	1	2	2	2	1	1	1	1	7	7	1	1	7	1	3	0	0	0	0	3	0	0	0	5	5
Female	26.4	25-29 yr	married	Master's degree or above	21,000-29,999	Govt	Tertiary	general	<37 hours	3-5 years	Yes	No	No	No	0	0	0	0	0	2	1	4	2	1	2	2	2	1	2	1	3	1	1	1	2	1	3	1	3	0	1	0	0	1	0	0	0	1	5
Female	27.7	25-29 yr	married	Master's degree or above	21,000-29,999	Govt	Tertiary	em	<37 hours	3-5 years	No	Yes	No	No	0	3	3	0	0	2	2	2	1	2	1	2	1	1	5	4	2	1	2	4	2	2	2	6	2	3	3	2	2	0	3	3	0	3	2
Female	34.2	>29 yr	married	Bachelor's degree	21,000-29,999	Govt	Tertiary	surg	<37 hours	>5 years	No	Yes	No	No	0	0	0	0	0	2	2	2	3	4	4	2	2	3	3	3	3	4	4	3	3	3	3	3	2	1	1	1	1	0	0	0	0	4	3
Female	28	25-29 yr	married	Bachelor's degree	>29,999	Govt	Tertiary	surg	<37 hours	3-5 years	Yes	Yes	No	No	0	2	1	0	0	2	2	2	1	1	3	2	4	2	3	3	4	4	3	4	3	3	3	3	1	1	1	0	1	1	1	1	1	4	4
Female	24	<25 yr	unmarried	Bachelor's degree	21,000-29,999	Govt	Tertiary	criti	37-48 hours	<3 years	No	Yes	No	No	0	0	0	0	0	1	1	1	1	1	2	1	1	1	4	2	4	1	1	1	4	1	4	1	3	0	0	0	0	0	0	0	0	5	5
Female	39.3	>29 yr	married	Diploma degree	>29,999	Govt	Tertiary	med	<37 hours	>5 years	No	Yes	No	No	0	2	2	2	0	2	4	3	4	2	4	1	4	3	5	4	4	4	5	5	3	4	5	4	1	2	1	1	1	1	1	1	1	4	4
Female	25.8	25-29 yr	unmarried	Bachelor's degree	>29,999	Private	Primary	med	37-48 hours	<3 years	Yes	Yes	Yes	Yes	0	0	0	1	0	1	1	1	1	2	4	1	1	1	1	1	1	1	1	1	1	1	2	1	0	0	0	0	0	0	0	0	0	4	5
Female	22	<25 yr	unmarried	Diploma degree	<21,000	Private	Secondary	gyn	37-48 hours	<3 years	Yes	Yes	No	No	0	0	0	0	0	1	1	1	1	1	1	2	2	1	3	2	2	1	1	1	2	1	6	1	1	1	2	1	2	0	0	0	0	4	2
Female	27	25-29 yr	married	Diploma degree	<21,000	Private	Secondary	general	37-48 hours	3-5 years	Yes	Yes	No	Yes	0	0	0	1	0	1	1	1	1	1	1	1	5	3	1	3	1	1	4	1	1	1	4	1	3	3	3	0	0	0	0	0	1	2	4
Female	28	25-29 yr	unmarried	Diploma degree	21,000-29,999	Govt	Tertiary	criti	<37 hours	3-5 years	No	Yes	No	No	1	1	0	0	0	2	2	2	2	2	2	2	2	2	5	3	4	2	2	2	5	2	3	3	1	1	2	2	1	1	1	1	1	2	4
Female	24.2	<25 yr	married	Master's degree or above	>29,999	Govt	Tertiary	med	<37 hours	>5 years	No	Yes	No	No	1	2	3	1	0	2	3	2	4	3	5	3	5	4	2	3	4	4	5	7	2	4	5	5	2	2	2	2	2	2	1	2	2	2	2
Female	30	>29 yr	married	Diploma degree	>29,999	Govt	Tertiary	criti	<37 hours	>5 years	Yes	Yes	No	No	0	0	0	0	0	2	3	1	1	1	1	5	1	1	3	1	2	1	1	2	2	1	3	1	3	1	1	1	0	2	0	1	0	3	3
Female	32.4	>29 yr	married	Bachelor's degree	>29,999	Govt	Tertiary	surg	<37 hours	>5 years	No	Yes	No	No	0	0	0	0	0	2	2	1	2	2	4	2	4	2	4	4	4	5	5	4	4	3	4	3	1	1	2	2	1	1	1	2	1	2	2
Female	30	>29 yr	married	Master's degree or above	21,000-29,999	Govt	Tertiary	surg	<37 hours	>5 years	Yes	Yes	Yes	No	0	0	0	0	0	2	1	5	1	1	1	1	1	1	1	1	1	1	1	1	1	1	1	1	0	0	0	0	0	0	0	0	0	1	1
Female	28.6	25-29 yr	married	Diploma degree	21,000-29,999	Govt	Tertiary	med	<37 hours	>5 years	No	Yes	No	No	0	2	0	0	0	4	3	3	4	4	4	5	4	3	3	3	4	3	3	4	1	1	3	3	2	1	1	1	1	1	1	1	1	3	3
Female	26	25-29 yr	unmarried	Bachelor's degree	21,000-29,999	Govt	Tertiary	surg	<37 hours	<3 years	No	Yes	No	No	0	0	0	0	0	1	1	1	1	1	1	1	1	1	3	2	3	1	1	3	3	1	2	1	3	0	0	1	1	2	2	0	0	4	4
Female	25.8	25-29 yr	unmarried	Diploma degree	>29,999	Private	Primary	em	37-48 hours	<3 years	Yes	Yes	No	Yes	0	0	0	0	0	1	1	1	1	1	1	1	1	1	3	1	1	1	1	3	3	1	1	1	3	0	0	0	0	0	0	0	0	3	5
Female	27.4	25-29 yr	unmarried	Bachelor's degree	21,000-29,999	Govt	Tertiary	gyn	<37 hours	>5 years	No	Yes	Yes	No	0	2	0	0	0	3	2	2	2	2	5	2	4	2	2	2	3	1	2	3	2	2	2	2	1	1	1	0	1	1	0	1	1	3	3
Female	31	>29 yr	married	Bachelor's degree	21,000-29,999	Private	Tertiary	med	<37 hours	3-5 years	Yes	Yes	No	No	0	0	0	0	0	1	1	1	1	1	1	1	1	1	1	1	1	1	1	1	1	1	1	1	2	0	0	0	0	0	0	0	0	5	5
Female	34	>29 yr	married	Diploma degree	21,000-29,999	Govt	Tertiary	criti	37-48 hours	<3 years	Yes	Yes	No	No	0	3	3	0	0	2	1	1	2	2	2	3	3	4	3	1	1	1	1	1	2	1	3	1	3	0	0	0	0	0	0	0	0	4	5
Female	25	25-29 yr	unmarried	Diploma degree	<21,000	Private	Tertiary	med		3-5 years	No	Yes	No	No	0	0	0	0	0	2	1	1	1	1	1	2	1	1	1	1	1	1	1	1	1	1	1	1	3	0	0	0	1	0	0	0	0	4	5
Female	25.8	25-29 yr	married	Bachelor's degree	<21,000	Private	Tertiary	criti	>48 hours	3-5 years	Yes	No	No	No	0	3	1	0	0	1	5	3	5	5	3	1	3	2	4	5	6	1	1	7	3	2	3	4	0	3	2	1	2	2	0	0	3	1	2
Female	32	>29 yr	married	Bachelor's degree	>29,999	Govt	Tertiary	med	<37 hours	>5 years	No	Yes	No	No	1	1	0	0	0	2	2	2	2	2	2	2	2	2	5	3	4	2	2	2	4	2	3	3	1	1	2	2	1	1	1	1	1	2	4
Female	27	25-29 yr	married	Master's degree or above	21,000-29,999	Govt	Tertiary	surg	37-48 hours	<3 years	No	Yes	No	Yes	2	3	3	0	0	2	5	2	2	2	2	2	2	2	6	5	5	3	6	5	2	4	7	3	1	0	3	3	3	3	0	0	0	5	5
Female	27	25-29 yr	unmarried	Bachelor's degree	21,000-29,999	Govt	Tertiary	general	<37 hours	>5 years	No	Yes	No	No	0	0	0	0	0	1	1	1	1	2	2	2	2	2	1	1	1	1	1	1	1	1	1	1	3	3	0	0	0	0	0	0	0	5	5
Female	26.9	25-29 yr	unmarried	Diploma degree	<21,000	Private	Tertiary	criti	>48 hours	3-5 years	Yes	Yes	Yes	No	0	3	1	0	0	2	2	2	2	2	4	2	2	2	4	4	5	1	4	4	3	1	7	4	3	1	2	0	0	3	0	0	1	3	4
Female	25	25-29 yr	unmarried	Bachelor's degree	21,000-29,999	Govt	Tertiary	med	<37 hours	<3 years	No	No	No	Yes	0	2	1	0	0	2	4	3	2	3	1	2	2	3	3	5	1	3	1	3	1	1	7	7	2	1	2	1	1	0	3	2	2	4	4
Female	31	>29 yr	married	Diploma degree	>29,999	Govt	Tertiary	med	<37 hours	3-5 years	No	Yes	No	No	0	3	0	1	0	2	2	2	1	2	2	1	1	1	4	4	4	4	3	3	4	2	5	3	3	1	3	1	3	1	0	0	0	4	4
Female	24.2	<25 yr	unmarried	Diploma degree	<21,000	Private	Tertiary	general	37-48 hours	<3 years	No	Yes	No	Yes	0	3	1	0	0	2	2	4	1	3	3	1	1	2	4	1	4	1	4	4	2	1	7	1	3	1	0	0	1	3	0	0	0	2	3
Female	24	<25 yr	unmarried	Diploma degree	<21,000	Private	Secondary	criti	37-48 hours	<3 years	Yes	Yes	No	No	0	1	0	0	0	1	1	3	2	5	5	1	2	1	3	4	4	2	3	1	3	2	5	1	3	1	0	1	2	3	0	1	1	2	5
Female	24.4	<25 yr	married	Bachelor's degree	<21,000	Private	Tertiary	surg	37-48 hours	3-5 years	Yes	Yes	No	Yes	0	0	0	0	0	1	1	1	1	2	1	1	1	1	4	3	4	1	1	3	3	1	6	1	3	0	0	0	0	0	0	0	0	4	4
Female	24.9	<25 yr	unmarried	Diploma degree	>29,999	Private	Primary	general	>48 hours	3-5 years	Yes	Yes	No	Yes	0	1	0	0	0	5	1	1	1	2	2	2	2	1	1	1	1	2	1	4	1	1	4	3	3	1	3	0	3	0	3	0	0	5	5
Female	25	25-29 yr	unmarried	Bachelor's degree	21,000-29,999	Govt	Tertiary	surg	<37 hours	3-5 years	No	Yes	No	Yes	0	2	0	0	0	2	2	1	2	1	1	1	1	1	4	3	1	1	1	1	4	1	4	1	3	1	0	1	0	1	1	0	0	4	4
Female	24	<25 yr	married	Bachelor's degree	>29,999	Private	Tertiary	med	37-48 hours	<3 years	No	Yes	No	No	0	0	0	0	0	1	2	2	1	1	2	2	1	1	4	4	4	2	3	4	3	3	3	3	1	1	0	1	0	0	0	0	0	3	3
Female	28	25-29 yr	unmarried	Bachelor's degree	>29,999	Govt	Tertiary	med	>48 hours	3-5 years	No	Yes	No	No	1	3	3	3	0	1	1	2	1	2	2	1	2	1	5	1	4	1	4	4	5	4	6	4	1	2	2	2	1	2	1	1	1	2	3
Female	30	>29 yr	married	Master's degree or above	>29,999	Govt	Secondary	med	<37 hours	3-5 years	No	Yes	No	No	0	1	0	0	0	1	1	2	1	2	2	2	2	1	4	3	4	1	4	5	4	3	6	1	3	0	0	2	1	1	2	0	0	4	5
Female	27	25-29 yr	married	Master's degree or above	21,000-29,999	Govt	Tertiary	criti	<37 hours	3-5 years	No	Yes	Yes	No	0	3	0	2	0	2	3	2	3	2	2	2	2	3	1	3	1	2	4	4	5	4	3	5	3	1	3	2	3	2	1	3	2	3	3
Female	44	>29 yr	married	Diploma degree	>29,999	Govt	Secondary	criti	>48 hours	>5 years	Yes	Yes	No	No	0	0	0	0	0	1	2	2	1	1	2	1	5		4	2	4	3	5	1	7	4	5	1										5	5
Female	35	>29 yr	married	Bachelor's degree	>29,999	Govt	Tertiary	general	37-48 hours	>5 years	Yes	Yes	No	No	0	1	0	2	0	1	2	1	1	2	2	5	1	1	3	1	2	2	1	3	2	1	3	1	3	0	0	1	0	2	1	0	0	4	4
Female	26	25-29 yr	unmarried	Diploma degree	21,000-29,999	Govt	Tertiary	med	<37 hours	3-5 years	Yes	Yes	No	No	0	0	0	0	0	1	1	1	1	1	1	1	2	2	5	4	4	1	4	5	4	3	5	4	0	2	0	1	1	1	2	0	1	4	3
Female	25	25-29 yr	married	Bachelor's degree	<21,000	Private	Tertiary	gyn	37-48 hours	>5 years	No	Yes	No	No	1	1	0	0	0	2	3	3	3	5	5	5	5	3	7	6	3	2	3	6	5	3	5	1	3	3	2	2	3	1	1	1	1	4	4
Female	26.6	25-29 yr	married	Master's degree or above	21,000-29,999	Govt	Tertiary	med	37-48 hours	3-5 years	Yes	Yes	No	No	0	0	0	0	0	1	1	1	1	1	1	2	1	1	2	1	1	1	1	1	1	1	1	1	3	0	0	0	0	0	0	0	0	4	4
Female	34.2	>29 yr	married	Bachelor's degree	>29,999	Govt	Tertiary	med	<37 hours	>5 years	No	Yes	No	No	0	1	1	0	0	2	2	1	2	2	2	1	2	1	4	3	4	3	3	4	2	2	5	3	1	1	0	0	0	1	1	1	1	4	4
Female	32.8	>29 yr	married	Diploma degree	21,000-29,999	Govt	Tertiary	med	37-48 hours	>5 years	No	Yes	Yes	No	2	2	3	0	0	4	1	2	1	5	3	2	3	1	1	1	1	2	2	3	1	1	3	1	2	2	2	2	0	1	0	0	0	4	5
Female	24	<25 yr	unmarried	Bachelor's degree	21,000-29,999	Private	Tertiary	criti	37-48 hours	<3 years	Yes	Yes	No	No	0	1	0	0	0	2	1	2	1	1	2	2	2	1	4	4	2	1	4	4	5	1	5	2	3	0	0	1	1	1	0	0	0	4	5
Female	28.8	25-29 yr	unmarried	Bachelor's degree	21,000-29,999	Govt	Tertiary	criti	<37 hours	>5 years	No	Yes	Yes	No	0	2	1	0	0	2	2	2	2	3	3	2	4	2	5	5	5	4	4	4	5	5	5	3	2	1	1	1	1	1	1	0	0	2	3
Female	28	25-29 yr	unmarried	Bachelor's degree	21,000-29,999	Govt	Primary	general	37-48 hours	3-5 years	Yes	Yes	No	No	0	3	3	3	1	2	1	2	1	2	2	2	1	1	5	4	5	4	3	4	3	1	5	4	1	3	2	2	2	2	3	3	1	2	2
Female	36	>29 yr	married	Bachelor's degree	>29,999	Govt	Secondary	surg	<37 hours	>5 years	No	Yes	No	No	0	0	0	0	0	2	2	2	2	2	2	2	2	1	5	3	1	1	3	4	3	2	2	1	3	0	0	0	0	0	0	0	0	5	5
Female	28	25-29 yr	married	Bachelor's degree	>29,999	Govt	Tertiary	med	<37 hours	3-5 years	Yes	Yes	No	No	0	3	2	0	0	2	2	1	1	5	5	1	5	3	3	4	3	1	4	3	3	3	1	1	3	0	0	0	0	0	0	0	0	1	1
Female	24	<25 yr	married	Diploma degree	<21,000	Private	Secondary	med	<37 hours	<3 years	Yes	Yes	No	No	0	1	0	0	0	1	1	1	1	2	1	2	2	1	4	3	4	3	4	5	5	4	1	1	3	1	3	2	0	0	0	0	0	5	5
Female	24	<25 yr	unmarried	Diploma degree	>29,999	Private	Tertiary	med	>48 hours	<3 years	Yes	Yes	No	No	0	1	0	0	0	1	2	1	2	2	2	2	2	2	3	3	3	3	3	3	4	4	4	1	3	0	0	0	0	0	0	0	0	2	4
Female	28.4	25-29 yr	unmarried	Diploma degree	>29,999	Govt	Tertiary	med	<37 hours	>5 years	No	Yes	Yes	No	1	1	1	0	0	2	2	2	2	2	2	1	2	2	2	2	2	2	2	2	2	2	2	2	1	2	2	1	2	1	1	1	1	3	3
Female	25.3	25-29 yr	unmarried	Master's degree or above	<21,000	Private	Tertiary	med	37-48 hours	3-5 years	No	Yes	No	No	2	3	2	0	0	2	1	2	2	2	5	1	1	1	7	7	7	6	7	7	1	7	6	7	1	3	3	2	2	3	3	2	3	3	1
Female	27.8	25-29 yr	married	Bachelor's degree	>29,999	Private	Tertiary	general	<37 hours	<3 years	No	No	Yes	Yes	0	3	0	0	0	2	1	1	1	2	2	1	4	1	2	2	4	1	2	3	1	1	1	2	1	1	0	1	0	0	0	0	0	3	3
Female	23.5	<25 yr	unmarried	Diploma degree	<21,000	Private	Tertiary	general	37-48 hours	<3 years	Yes	Yes	No	No	1	1	0	0	0	2	1	2	1	4	2	3	1	1	6	6	5	1	1	6	7	1	4	1	3	2	2	2	2	0	1	0	0	4	4
Female	27.2	25-29 yr	unmarried	Bachelor's degree	21,000-29,999	Govt	Tertiary	med	<37 hours	3-5 years	No	Yes	No	No	0	0	0	0	0	1	2	1	1	2	2	2	4	2	2	2	3	3	3	2	2	2	2	2	1	0	0	0	0	0	0	1	0	3	3
Female	30	>29 yr	unmarried	Master's degree or above	21,000-29,999	Govt	Tertiary	criti	37-48 hours	>5 years	No	Yes	No	No	0	3	0	0	0	1	1	1	1	1	1	1	1	1	6	5	4	5	5	5	4	3	4	3	1	1	1	1	2	1	2	1	1	3	3
Female	25	25-29 yr	unmarried	Bachelor's degree	<21,000	Private	Tertiary	criti	<37 hours	<3 years	Yes	Yes	No	No	0	3	0	0	0	2	2	1	5	5	5	2	2	2	2	4	7	1	7	7	2	3	7	1	2	3	3	1	2	2	1	1	0	2	3
Female	27.2	25-29 yr	married	Diploma degree	21,000-29,999	Govt	Tertiary	surg	<37 hours	3-5 years	Yes	Yes	Yes	No	0	0	1	0	0	3	1	3	3	3	3	2	3	2	3	3	3	1	2	2	1	1	1	7	1	1	0	0	0	0	1	1	1	4	4
Female	27	25-29 yr	unmarried	Master's degree or above	21,000-29,999	Govt	Tertiary	criti	<37 hours	<3 years	Yes	Yes	No	No	0	0	1	0	0	2	1	2	1	2	2	2	1	1	4	5	7	1	5	6	3	6	1	1	3	2	0	1	1	3	0	0	0	3	3
Female	23.3	<25 yr	unmarried	Diploma degree	<21,000	Private	Primary	med	>48 hours	<3 years	No	Yes	No	No	0	3	0	1	0	2	2	2	3	2	2	2	2	2	5	4	4	3	4	4	5	2	4	4	2	1	0	1	0	1	1	0	0	1	5
Female	30.5	>29 yr	married	Bachelor's degree	21,000-29,999	Govt	Primary	gyn	>48 hours	>5 years	Yes	Yes	No	No	0	3	2	0	0	2	2	1	2	2	2	2	5	1	7	4	3	3	3	4	6	3	7	5	1	1	1	1	1	1	2	0	0	4	5
Female	23	<25 yr	unmarried	Diploma degree	<21,000	Private	Primary	gyn	37-48 hours	<3 years	No	Yes	No	No	0	0	1	1	0	5	4	5	5	2	1	3	5	2	4	3	4	4	4	4	3	1	7	7	3	1	3	2	1	3	3	0	1	2	4
Female	28	25-29 yr	unmarried	Diploma degree	<21,000	Private	Secondary	gyn	37-48 hours	3-5 years	Yes	Yes	Yes	Yes	1	0	0	1	1	1	1	1	1	1	1	1	1	1	2	1	1	2	1	1	2	1	1	1	1	1	1	1	1	1	1	1	1	4	2
Female	25.2	25-29 yr	married	Diploma degree	21,000-29,999	Private	Tertiary	general	>48 hours	<3 years	No	Yes	No	No	0	0	0	0	0	1	1	1	1	1	1	1	1	1	4	3	1	1	1	1	1	1	6	1	3	0	3	3	3	0	0	0	0	5	5
Female	27	25-29 yr	unmarried	Diploma degree	21,000-29,999	Govt	Tertiary	em	<37 hours	3-5 years	No	Yes	No	No	1	1	0	0	0	2	2	2	2	2	2	2	2	2	5	3	4	2	2	2	4	2	3	3	1	1	2	2	1	1	1	1	1	2	4
Female	31.7	>29 yr	married	Bachelor's degree	>29,999	Govt	Tertiary	surg	37-48 hours	>5 years	No	Yes	No	No	0	3	2	0	0	2	2	2	1	2	3	2	3	2	2	2	2	2	1	3	2	2	2	3	1	1	0	0	0	1	1	1	1	3	3
Female	24	<25 yr	unmarried	Bachelor's degree	<21,000	Private	Tertiary	gyn	<37 hours	<3 years	Yes	Yes	No	No	0	3	0	0	0	2	2	2	2	5	2	2	2	2	7	7	7	1	2	5	2	2	1	7	0	3	1	3	0	3	3	1	1	1	1
Female	31	>29 yr	unmarried	Master's degree or above	21,000-29,999	Govt	Tertiary	surg	37-48 hours	>5 years	Yes	Yes	No	No	0	3	2	0	0	4	2	1	1	2	1	2	4	3	4	6	6	2	3	7	3	4	4	3	1	2	0	1	1	3	2	2	2	2	2
Female	33.2	>29 yr	married	Diploma degree	21,000-29,999	Govt	Tertiary	surg	<37 hours	>5 years	No	Yes	Yes	No	0	3	2	0	0	2	2	1	3	2	4	2	4	1	5	5	5	3	4	5	4	3	3	3	2	2	1	1	1	1	1	1	1	3	3
Female	32.2	>29 yr	married	Bachelor's degree	>29,999	Govt	Tertiary	criti	<37 hours	>5 years	No	Yes	No	No	0	0	0	0	0	2	2	2	1	2	3	2	4	2	2	2	3	3	3	3	2	2	3	3	1	1	2	1	2	1	2	1	1	3	2
Female	32.7	>29 yr	married	Bachelor's degree	21,000-29,999	Govt	Tertiary	criti	37-48 hours	>5 years	No	Yes	No	No	2	3	3	2	0	2	2	5	5	5	5	4	5	5	4	3	7	6	7	5	1	4	7	1	1	1	0	0	0	1	0	0	0	2	4
Female	29	25-29 yr	married	Master's degree or above	21,000-29,999	Govt	Secondary	med	>48 hours	<3 years	Yes	Yes	No	No	0	3	3	1	0	2	2	3	2	2	3	1	2	2	7	7	6	4	4	5	6	3	6	1	3	2	3	3	3	2	2	0	2	5	5
Female	23	<25 yr	unmarried	Diploma degree	21,000-29,999	Private	Tertiary	med	<37 hours	3-5 years	Yes	Yes	No	No	0	0	2	1	0	2	2	2	1	2	2	2	1	1	3	4	4	1	4	4	3	3	2	1	2	1	0	1	0	1	2	1	1	4	3
Female	32	>29 yr	married	Bachelor's degree	21,000-29,999	Govt	Tertiary	criti	37-48 hours	>5 years	Yes	Yes	No	No	0	3	0	0	0	2	2	5	2	2	2	2	5	1	3	4	7	1	7	7	3	4	5	7	3	3	0	0	3	2	0	0	0	5	5
Female	24	<25 yr	unmarried	Bachelor's degree	<21,000	Private	Secondary	med	37-48 hours	<3 years	Yes	Yes	No	No	0	2	1	2	0	1	1	1	2	3	3	1	4	5	5	4	4	1	3	6	4	6	7	1	1	1	2	2	2	2	0	0	0	2	4
Female	25.2	25-29 yr	married	Diploma degree	>29,999	Private	Primary	em	37-48 hours	3-5 years	Yes	Yes	Yes	Yes	0	0	0	0	0	2	2	2	1	1	1	2	5	1	3	3	4	1	1	1	3	3	4	1	3	0	0	0	0	1	0	1	0	5	5
Female	28	25-29 yr	married	Master's degree or above	21,000-29,999	Govt	Secondary	med	<37 hours	3-5 years	Yes	Yes	No	No	0	3	0	0	0	2	2	2	2	4	2	2	2	1	6	6	6	1	6	6	4	4	2	3	1	3	1	1	2	1	0	3	0	3	3
Female	28.2	25-29 yr	unmarried	Master's degree or above	21,000-29,999	Govt	Secondary	med	37-48 hours	>5 years	No	Yes	No	No	2	3	1	0	0	2	2	2	1	2	2	2	2	2	6	5	5	2	4	6	4	4	5	4	1	1	1	1	1	1	1	0	0	4	5
Female	31.2	>29 yr	married	Diploma degree	>29,999	Govt	Tertiary	gyn	<37 hours	>5 years	No	Yes	No	No	0	1	0	0	0	2	2	2	2	2	4	2	4	2	2	3	3	3	3	4	3	3	3	3	2	1	2	2	2	1	1	2	2	2	2
Female	22	<25 yr	unmarried	Diploma degree	<21,000	Private	Primary	gyn	>48 hours	<3 years	No	No	No	No	3	3	3	3	3	2	3	2	2	4	2	2	4	2	5	3	3	4	4	3	4	5	5	1	2	1	0	3	0	1	3	0	0	2	1
Female	28	25-29 yr	unmarried	Bachelor's degree	<21,000	Private	Secondary	criti	37-48 hours	3-5 years	No	No	No	No	0	0	3	0	0	1	1	1	1	1	1	3	1	1	4	1	1	1	1	1	1	1	4	3	0	3	0	2	2	3	3	0	2	1	1
Female	35.4	>29 yr	married	Diploma degree	21,000-29,999	Govt	Tertiary	general	37-48 hours	>5 years	No	Yes	No	No	0	2	2	1	0	1	5	4	3	3	4	3	5	5	5	5	4	3	3	5	3	4	7	5	2	3	3	1	1	0	1	0	0	1	1
Female	25	25-29 yr	unmarried	Diploma degree	<21,000	Govt	Tertiary	med	<37 hours	<3 years	No	Yes	No	No	0	3	3	0	0	2	5	2	5	5	5	2	5	2	4	5	6	1	1	5	3	4	3	1	0	3	3	0	0	1	0	0	0	4	4
Female	40	>29 yr	married	Bachelor's degree	>29,999	Govt	Tertiary	general	37-48 hours	>5 years	No	Yes	No	No	0	3	0	0	0	2	2	2	2	2	2	2	2	2	1	1	1	1	7	7	1	1	7	1	3	0	0	0	0	3	0	0	0	5	5
Female	30.4	>29 yr	married	Bachelor's degree	>29,999	Govt	Tertiary	gyn	<37 hours	>5 years	No	Yes	Yes	No	0	0	0	0	0	2	2	1	2	2	2	2	2	2	1	1	1	1	1	1	1	1	1	1	2	0	0	0	0	0	0	0	0	4	4
Female	22.4	<25 yr	unmarried	Bachelor's degree	>29,999	Private	Tertiary	med	<37 hours	3-5 years	No	Yes	No	No	0	0	0	0	0	1	1	1	1	1	2	2	2	1	4	4	3	1	1	4	2	2	4	4	2	1	0	1	1	1	0	0	0	3	4
Female	28	25-29 yr	married	Bachelor's degree	21,000-29,999	Govt	Tertiary	surg	37-48 hours	>5 years	Yes	Yes	Yes	No	0	0	0	0	0	1	1	1	1	1	3	4	1	1	1	1	1	1	1	1	2	1	3	5	3	0	0	0	0	0	3	0	0	4	4
Female	37.7	>29 yr	married	Diploma degree	>29,999	Govt	Tertiary	med	<37 hours	>5 years	No	Yes	No	No	0	3	3	3	0	4	4	3	3	2	4	2	4	2	5	5	5	5	5	5	2	4	5	3	1	1	1	1	0	1	1	1	1	4	4
Female	28	25-29 yr	married	Diploma degree	21,000-29,999	Govt	Tertiary	criti	37-48 hours	3-5 years	Yes	Yes	No	No	1	1	0	0	0	2	2	3	2	2	2	2	2	2	7	4	2	1	2	3	2	2	2	2	1	0	0	2	2	1	1	0	0	4	4
Female	33.2	>29 yr	married	Bachelor's degree	>29,999	Govt	Tertiary	surg	37-48 hours	>5 years	Yes	Yes	Yes	No	0	2	0	0	0	2	2	2	3	2	3	2	4	2	3	3	3	4	3	4	3	3	5	4	1	1	1	1	2	1	2	2	2	3	3
Female	27.2	25-29 yr	unmarried	Bachelor's degree	21,000-29,999	Govt	Tertiary	criti	37-48 hours	>5 years	Yes	Yes	No	No	1	3	0	0	0	2	2	1	1	2	2	1	1	1	3	1	4	2	4	4	3	1	4	1	3	0	1	0	2	0	0	3	0	5	5
Female	28	25-29 yr	unmarried	Diploma degree	21,000-29,999	Govt	Tertiary	surg	<37 hours	3-5 years	No	Yes	No	No	1	1	0	0	0	1	1	2	1	2	2	2	2	1	3	2	1	2	1	2	2	2	2	1	0	0	0	0	0	0	0	1	0	1	4
Female	28	25-29 yr	unmarried	Diploma degree	21,000-29,999	Govt	Tertiary	med	37-48 hours	3-5 years	Yes	Yes	No	No	0	0	0	0	0	2	3	1	1	1	1	5	1	1	3	1	2	1	1	2	2	1	3	1	3	1	1	1	0	2	0	1	0	3	3
Female	22	<25 yr	unmarried	Diploma degree	<21,000	Private	Tertiary	med	<37 hours	<3 years	Yes	Yes	No	No	0	0	0	0	0	1	1	1	1	1	1	2	1	1	4	1	1	1	1	1	1	1	1	1	3	1	1	3	1	1	0	0	0	4	4
Female	30.2	>29 yr	married	Bachelor's degree	21,000-29,999	Govt	Tertiary	em	37-48 hours	>5 years	Yes	Yes	No	Yes	2	0	0	0	0	1	2	2	2	1	1	1	1	1	4	3	1	1	3	4	3	3	4	1	3	0	1	1	0	1	1	0	0	5	5
Female	27	25-29 yr	unmarried	Diploma degree	21,000-29,999	Govt	Tertiary	em	37-48 hours	3-5 years	No	Yes	No	No	2	1	2	2	2	2	1	2	2	2	2	2	2	2	7	2	3	1	3	2	2	2	2	3	3	0	2	0	0	0	0	0	0	4	4
Female	30	>29 yr	married	Diploma degree	21,000-29,999	Govt	Tertiary	criti	<37 hours	>5 years	Yes	Yes	Yes	No	1	0	1	0	1	2	3	3	1	1	2	2	2	1	5	4	2	2	3	5	5	4	2	4	3	3	3	3	2	3	2	2	1	5	5
Female	25.9	25-29 yr	married	Bachelor's degree	<21,000	Private	Tertiary	criti	<37 hours	3-5 years	No	Yes	No	No	0	3	1	0	0	2	2	2	2	3	2	2	2	2	4	4	4	4	4	4	1	4	2	5	0	1	1	2	0	0	0	0	0	2	2
Female	26.4	25-29 yr	unmarried	Diploma degree	21,000-29,999	Govt	Tertiary	criti	37-48 hours	3-5 years	Yes	Yes	No	No	0	2	1	0	0	2	1	2	1	2	2	2	2	2	3	4	1	1	5	4	3	3	5	1	3	0	2	1	1	3	0	1	0	4	5
Female	38	>29 yr	married	Master's degree or above	>29,999	Govt	Tertiary	med	37-48 hours	>5 years	No	Yes	Yes	No	0	1	0	1	0	1	2	2	1	1	2	1	2	1	3	4	4	2	4	4	3	3	4	1	3	2	0	0	1	1	0	0	0	3	2
Female	37	>29 yr	married	Bachelor's degree	>29,999	Govt	Tertiary	surg	<37 hours	>5 years	No	Yes	Yes	No	0	1	0	0	0	2	2	1	1	2	3	2	4	2	2	2	3	3	3	3	3	2	2	3	1	1	2	1	1	1	0	1	1	3	3
Female	27.5	25-29 yr	married	Diploma degree	21,000-29,999	Govt	Primary	general	>48 hours	>5 years	No	Yes	No	No	0	3	2	0	0	2	2	2	2	1	2	2	2	2	5	5	5	5	6	7	3	3	6	5	1	1	1	1	1	3	1	0	0	2	2
Female	28	25-29 yr	married	Diploma degree	21,000-29,999	Govt	Primary	general	<37 hours	<3 years	No	No	Yes	No	0	3	3	0	0	2	1	2	1	2	1	1	1	1	3	4	4	2	1	2	1	1	1	1	2	0	0	1	1	1	3	0	1	4	4
Female	33.2	>29 yr	married	Bachelor's degree	>29,999	Govt	Tertiary	gyn	37-48 hours	>5 years	Yes	Yes	Yes	No	0	2	1	0	0	2	2	2	2	1	2	1	3	1	2	2	2	1	2	2	1	1	1	3	2	1	0	0	0	0	0	1	0	3	2
Female	28.3	25-29 yr	unmarried	Master's degree or above	>29,999	Govt	Tertiary	surg	<37 hours	>5 years	Yes	Yes	Yes	No	0	2	1	0	0	2	2	2	1	1	2	2	4	2	4	4	4	5	4	5	4	4	6	3	2	1	1	1	1	0	0	1	1	4	3
Female	27	25-29 yr	unmarried	Bachelor's degree	<21,000	Private	Tertiary	med	<37 hours	3-5 years	No	Yes	No	No	0	0	0	0	0	2	1	1	1	1	1	2	1	1	1	1	1	1	1	1	1	1	1	1	3	0	0	0	1	0	0	0	0	4	5
Female	30	>29 yr	married	Diploma degree	21,000-29,999	Govt	Tertiary	criti	37-48 hours	>5 years	Yes	Yes	Yes	Yes	0	0	3	0	0	1	1	1	1	1	1	1	1	1	3	4	1	1	4	2	1	1	4	1	3	0	0	0	0	0	0	0	0	4	3
Female	23.8	<25 yr	unmarried	Diploma degree	<21,000	Private	Tertiary	criti	>48 hours	<3 years	No	No	No	No	1	2	0	0	0	1	2	2	2	2	2	1	2	2	4	1	3	1	6	3	5	1	7	4	2	1	0	1	0	1	2	0	1	4	4
Female	27.4	25-29 yr	unmarried	Diploma degree	21,000-29,999	Govt	Tertiary	criti	37-48 hours	>5 years	Yes	Yes	No	No	0	0	0	0	0	2	2	1	2	1	2	1	2	1	2	2	4	3	7	7	4	1	7	1	3	3	1	1	0	2	0	1	2	3	4
Female	38.1	>29 yr	married	Bachelor's degree	21,000-29,999	Govt	Tertiary	surg	>48 hours	>5 years	No	Yes	No	Yes	0	0	0	0	0	1	1	1	1	1	2	1	2	1	3	1	1	1	1	1	3	1	1	1	0	3	0	0	0	0	0	0	0	5	5
Female	43.6	>29 yr	married	Diploma degree	>29,999	Govt	Tertiary	med	>48 hours	>5 years	Yes	Yes	No	No	3	3	3	0	0	2	2	3	2	1	1	1	1	1	3	4	7	1		4	4	6	1	5	3	0	3	3	0	0	0	0	0	4	4
Female	24	<25 yr	married	Diploma degree	<21,000	Private	Tertiary	criti	<37 hours	<3 years	Yes	No	No	No	0	0	0	0	0	1	1	1	1	1	1	1	1	1	4	3	4	2	5	5	4	2	5	1	0	1	0	3	0	0	0	1	2	1	1
Female	36.2	>29 yr	married	Bachelor's degree	>29,999	Govt	Tertiary	surg	<37 hours	>5 years	No	Yes	No	No	0	2	1	1	1	2	2	3	2	2	3	2	2	2	3	3	4	4	3	4	3	2	2	3	1	1	1	1	1	1	1	2	2	3	3
Female	39.2	>29 yr	married	Bachelor's degree	>29,999	Govt	Tertiary	surg	<37 hours	>5 years	No	Yes	Yes	No	0	1	1	0	0	2	2	2	2	2	2	2	3	2	4	4	4	4	4	4	3	3	3	3	2	0	1	0	0	0	0	0	0	3	3
Female	50	>29 yr	married	Master's degree or above	>29,999	Govt	Tertiary	general	<37 hours	>5 years	No	Yes	No	No	0	3	0	0	0	2	2	2	3	2	1	2	2	1	5	4	4	1	3	4	3	2	3	1	2	2	1	1	1	1	1	0	0	5	5
Female	39.8	>29 yr	married	Master's degree or above	>29,999	Govt	Tertiary	med	<37 hours	>5 years	No	Yes	No	No	0	0	0	0	0	2	1	1	1	2	2	2	2	2	2	2	2	1	2	2	1	1	2	2	1	1	1	1	0	1	0	0	1	3	3
Female	29.8	25-29 yr	married	Bachelor's degree	21,000-29,999	Govt	Secondary	med	37-48 hours	3-5 years	No	Yes	No	No	0	0	2	0	0	1	1	1	1	1	1	1	1	1	3	1	1	3	3	2	3	1	3	1	1	0	0	0	0	0	0	0	0	4	4
Female	25.3	25-29 yr	married	Bachelor's degree	<21,000	Private	Tertiary	med	<37 hours	<3 years	Yes	Yes	No	No	0	1	0	0	0	1	1	1	2	2	2	2	2	1	2	2	2	1	2	2	4	2	3	2	2	0	0	0	0	0	0	0	0	3	4
Female	23.8	<25 yr	unmarried	Diploma degree	<21,000	Private	Tertiary	gyn	<37 hours	<3 years	Yes	Yes	No	Yes	0	3	0	0	0	2	1	5	5	5	5	5	1	1	7	7	7	7	7	7	7	1	7	1	3	3	0	3	0	0	0	0	0	1	1
Female	25.2	25-29 yr	unmarried	Bachelor's degree	<21,000	Private	Tertiary	gyn	37-48 hours	<3 years	No	Yes	No	No	0	2	0	0	0	2	1	2	1	2	2	1	2	1	4	3	1	1	1	3	1	1	4	1	3	0	2	2	0	0	0	1	0	4	5
Female	22.3	<25 yr	unmarried	Diploma degree	<21,000	Govt	Primary	general	37-48 hours	<3 years	Yes	Yes	Yes	Yes	0	0	0	0	0	1	1	1	1	1	1	1	1	1	3	1	1	1	1	1	3	1	3	1	3	0	1	0	0	1	0	0	0	5	5
Female	21.6	<25 yr	unmarried	Diploma degree	<21,000	Private	Tertiary	med	<37 hours	<3 years	Yes	Yes	No	No	3	3	1	0	0	1	3	1	1	5	2	2	5	2	5	3	1	2	4	2	4	1	6	1	2	0	2	2	2	1	1	2	0	4	4
Female	24.6	<25 yr	unmarried	Bachelor's degree	21,000-29,999	Govt	Tertiary	general	<37 hours	<3 years	No	Yes	No	No	0	2	2	0	0	2	4	1	1	2	1	1	5	2	5	4	4	3	4	4	4	1	4	4	3	0	0	3	0	0	3	0	0	4	5
Female	31.2	>29 yr	unmarried	Diploma degree	21,000-29,999	Govt	Tertiary	surg	<37 hours	>5 years	No	Yes	Yes	No	0	0	0	0	0	2	2	2	3	4	4	1	2	2	5	5	6	4	4	6	4	4	4	5	2	1	1	1	1	1	1	0	0	2	3
Female	27	25-29 yr	married	Master's degree or above	21,000-29,999	Govt	Tertiary	surg	37-48 hours	<3 years	No	Yes	No	No	0	0	1	3	0	2	1	1	1	1	1	1	1	2	5	4	3	1	1	3	4	1	3	4	2	0	0	0	0	2	0	0	0	5	5
Female	32.4	>29 yr	married	Diploma degree	21,000-29,999	Govt	Tertiary	surg	<37 hours	>5 years	No	Yes	Yes	No	1	1	1	0	0	2	2	2	2	2	2	2	2	2	2	1	1	1	1	1	1	1	2	1	2	0	1	0	1	0	0	0	0	4	3
Female	25.2	25-29 yr	married	Diploma degree	21,000-29,999	Private	Tertiary	criti	37-48 hours	3-5 years	Yes	Yes	Yes	No	0	0	0	0	0	2	2	1	2	2	2	2	2	2	4	3	3	3	3	3	4	3	4	4	3	0	0	0	0	0	0	0	0	5	5
Female	24.4	<25 yr	unmarried	Bachelor's degree	<21,000	Private	Tertiary	gyn	<37 hours	<3 years	No	Yes	No	No	0	3	1	0	0	4	2	4	2	5	3	5	5	3	5	4	2	3	4	7	4	2	6	5	1	2	2	1	0	3	2	0	1	2	3
Female	28	25-29 yr	unmarried	Master's degree or above	>29,999	Govt	Tertiary	med	<37 hours	3-5 years	Yes	Yes	Yes	No	0	1	0	0	0	2	1	1	1	1	1	1	2	1	2	2	1	1	1	1	1	1	1	1	0	0	0	0	0	0	0	0	0	4	4
Female	28	25-29 yr	married	Diploma degree	21,000-29,999	Govt	Primary	med	37-48 hours	3-5 years	No	Yes	No	No	0	0	0	0	0	2	1	2	2	2	4	1	5	1	2	1	4	1	4	2	2	1	1	1	3	0	0	0	0	0	0	0	0	5	5
Female	25.7	25-29 yr	unmarried	Bachelor's degree	21,000-29,999	Govt	Tertiary	med	37-48 hours	3-5 years	No	Yes	No	No	0	2	1	0	0	2	2	1	2	2	1	2	2	2	3	3	3	1	2	2	3	2	4	3	3	1	1	1	0	1	1	1	1	3	4
Female	42	>29 yr	married	Master's degree or above	>29,999	Govt	Tertiary	general	<37 hours	>5 years	No	Yes	No	No	0	0	0	0	0	3	3	3	3	4	4	1	1	2	6	6	6	1	2	3	2	2	3	2	1	2	2	3	3	1	1	2	0	4	3
Female	25	25-29 yr	unmarried	Bachelor's degree	<21,000	Private	Tertiary	general	>48 hours	3-5 years	No	Yes	No	No	1	0	0	0	0	1	5	1	5	1	2	1	5	2	4	5	4	1	7	7	1	7	4	1	3	3	0	0	0	3	1	0	1	2	4
Female	32	>29 yr	married	Bachelor's degree	>29,999	Govt	Tertiary	med	<37 hours	>5 years	No	Yes	No	No	0	1	0	0	0	2	2	2	2	2	2	1	1	2	2	2	3	1	2	2	2	1	2	2	1	1	1	0	0	1	1	1	1	4	3
Female	30	>29 yr	married	Diploma degree	21,000-29,999	Govt	Secondary	med	37-48 hours	3-5 years	No	Yes	Yes	No	0	3	0	0	0	1	2	1	1	1	2	1	2	1	4	1	1	1	4	4	3	1	7	1	3	0	0	0	3	0	0	0	0	5	5
Female	25.5	25-29 yr	married	Diploma degree	<21,000	Private	Tertiary	gyn	37-48 hours	3-5 years	Yes	Yes	No	No	0	1	0	0	0	1	1	1	1	2	1	1	1	1	5	4	1	1	1	1	3	1	2	1	3	0	1	2	1	0	0	0	0	4	4
Female	26	25-29 yr	unmarried	Diploma degree	21,000-29,999	Govt	Tertiary	surg	37-48 hours	<3 years	No	Yes	No	No	0	3	2	2	0	5	5	3	4	5	5	5	5	4	3	5	6	5	6	6	3	4	6	1	0	1	0	1	0	1	1	0	0	1	4
Female	24.7	<25 yr	married	Diploma degree	<21,000	Private	Secondary	med	37-48 hours	<3 years	No	Yes	No	No	0	1	0	0	0	1	1	1	1	1	1	1	2	1	4	4	4	3	3	4	4	3	7	4	2	1	1	1	0	3	0	1	3	1	2
Female	31.8	>29 yr	unmarried	Bachelor's degree	21,000-29,999	Govt	Secondary	criti	<37 hours	<3 years	No	Yes	No	No	1	3	2	0	0	2	2	4	2	2	2	3	2	2	4	5	5	3	4	4	1	4	3	3	1	1	1	1	0	1	1	0	0	3	3
Female	28.4	25-29 yr	married	Bachelor's degree	21,000-29,999	Govt	Secondary	general	<37 hours	3-5 years	Yes	Yes	No	No	0	0	0	0	0	1	2	1	1	1	2	2	1	1	4	1	1	1	1	1	4	1	4	1	3	0	0	0	0	0	0	0	0	5	5
Female	24	<25 yr	unmarried	Diploma degree	<21,000	Private	Tertiary	criti	>48 hours	<3 years	Yes	Yes	Yes	Yes	0	0	0	0	0	1	1	1	1	1	1	1	1	1	3	3	3	1	1	2	1	1	1	1	3	0	0	0	0	0	0	0	0	5	5
Female	27	25-29 yr	married	Diploma degree	<21,000	Private	Tertiary	general	<37 hours	3-5 years	Yes	Yes	No	No	0	0	0	0	0	1	1	1	1	1	1	1	1	1	2	1	1	1	1	1	2	1	1	1	3	0	0	0	0	2	2	0	0	4	4
Female	35	>29 yr	married	Diploma degree	>29,999	Govt	Tertiary	general	37-48 hours	>5 years	Yes	Yes	No	No	0	3	0	0	0	2	2	2	2	2	1	2	2	2	1	1	1	1	1	7	1	1	7	1	3	0	0	0	0	3	0	0	0	5	5
Female	43.5	>29 yr	married	Bachelor's degree	>29,999	Govt	Tertiary	gyn	<37 hours	>5 years	No	Yes	No	No	0	2	2	0	0	2	2	2	2	2	2	1	2	2	2	2	2	1	1	2	1	1	1	1	1	0	0	0	0	1	0	0	0	5	4
Female	29	25-29 yr	married	Master's degree or above	21,000-29,999	Govt	Secondary	surg	<37 hours	>5 years	No	Yes	No	No	1	3	3	0	0	2	2	2	1	2	2	1	1	1	6	4	4	1	1	1	1	1	5	4	1	0	0	0	0	0	0	0	0	3	5
Female	29	25-29 yr	unmarried	Bachelor's degree	>29,999	Govt	Tertiary	em	37-48 hours	>5 years	No	Yes	No	No	2	1	1	0	0	5	3	2	3	3	2	1	2	2	7	2	4	1	2	3	3	3	3	3	0	1	1	1	1	1	1	0	0	5	3
Female	24	<25 yr	unmarried	Diploma degree	<21,000	Private	Primary	general	37-48 hours	<3 years	Yes	Yes	No	No	0	0	0	0	0	1	1	1	1	1	1	1	1	1	4	4	4	1	3	3	1	4	1	1	1	1	0	1	0	2	1	0	0	1	1
Female	28	25-29 yr	unmarried	Diploma degree	>29,999	Govt	Tertiary	criti	<37 hours	>5 years	No	Yes	No	No	0	3	3	0	1	2	4	3	5	5	2	3	2	2	3	7	3	2	7	2	1	1	1	1	3	1	0	0	0	0	0	0	0	4	5
Female	34.2	>29 yr	married	Bachelor's degree	>29,999	Govt	Tertiary	med	<37 hours	>5 years	No	Yes	Yes	No	0	1	2	0	0	2	1	2	1	2	2	1	1	1	3	3	3	1	3	3	2	2	3	3	3	0	0	0	0	0	0	0	0	4	4
Female	24.2	<25 yr	unmarried	Master's degree or above	>29,999	Private	Primary	general	37-48 hours	<3 years	Yes	Yes	No	Yes	0	0	1	0	0	2	1	1	2	1	1	1	1	1	3	1	1	2	3	3	3	1	5	1	3	1	0	0	1	0	0	0	0	5	5
Female	26	25-29 yr	married	Diploma degree	21,000-29,999	Govt	Tertiary	criti	>48 hours	3-5 years	No	No	No	No	2	3	3	3	2	5	4	4	5	3	4	3	4	3	5	4	5	3	4	5	5	3	3	6	3	2	2	2	1	2	3	2	2	3	4
Female	31.2	>29 yr	unmarried	Bachelor's degree	>29,999	Govt	Tertiary	surg	<37 hours	>5 years	No	Yes	Yes	No	0	1	1	0	0	2	2	2	2	2	2	1	2	2	3	3	3	2	2	3	2	2	2	4	1	1	1	0	0	0	0	0	0	2	3
Female	27	25-29 yr	unmarried	Master's degree or above	21,000-29,999	Govt	Tertiary	criti	<37 hours	<3 years	No	Yes	No	No	0	3	1	0	0	2	2	1	1	2	2	2	2	2	5	5	4	4	5	5	4	4	1	4	3	1	0	1	1	3	0	0	0	2	3
Female	26.7	25-29 yr	unmarried	Diploma degree	21,000-29,999	Govt	Tertiary	med	37-48 hours	<3 years	Yes	Yes	Yes	No	0	0	0	0	0	1	1	1	1	1	1	2	2	1	5	4	4	3	4	4	2	2	1	3	3	1	0	1	1	0	0	0	0	4	5
Female	24.5	<25 yr	married	Bachelor's degree	21,000-29,999	Private	Tertiary	criti	37-48 hours	<3 years	Yes	Yes	Yes	No	0	0	0	0	0	1	1	1	1	1	2	1	1	1	3	4	3	1	1	1	3	1	4	1	3	1	0	1	1	0	0	0	0	4	4
Female	24.5	<25 yr	married	Diploma degree	21,000-29,999	Govt	Tertiary	surg	37-48 hours	>5 years	No	Yes	No	No	0	3	0	3	0	5	4	5	5	4	5	2	2	1	6	6	6	6	7	7	6	6	7	7	2	3	0	3	1	3	3	2	2	3	4
Female	40	>29 yr	married	Bachelor's degree	>29,999	Govt	Tertiary	general	<37 hours	>5 years	Yes	Yes	No	No	0	0	0	2	0	1	2	1	1	2	2	5	1	1	3	1	2	2	1	3	2	1	3	1	3	0	0	1	0	2	1	0	0	4	4
Female	24.6	<25 yr	unmarried	Master's degree or above	21,000-29,999	Govt	Tertiary	med	<37 hours	<3 years	No	Yes	No	No	0	1	0	1	0	2	1	1	1	2	2	2	1	1	5	4	3	1	1	4	1	3	5	4	2	0	0	1	0	0	0	0	0	4	4
Female	32.4	>29 yr	married	Diploma degree	21,000-29,999	Govt	Tertiary	gyn	<37 hours	>5 years	No	Yes	Yes	No	0	0	0	0	0	2	2	2	2	2	2	1	1	1	1	1	1	1	1	1	1	1	1	1	3	0	1	0	1	0	0	0	0	4	4
Female	28	25-29 yr	married	Bachelor's degree	21,000-29,999	Govt	Tertiary	surg	<37 hours	>5 years	Yes	Yes	Yes	Yes	0	0	0	0	0	1	1	1	3	1	2	2	2	2	1	1	1	2	1	2	1	1	2	1	3	0	1	0	0	0	0	0	0	5	5
Female	33.3	>29 yr	married	Bachelor's degree	>29,999	Govt	Tertiary	med	37-48 hours	>5 years	No	Yes	No	No	0	3	0	0	0	2	2	2	2	2	2	2	2	2	5	4	4	3	4	4	2	2	1	3	3	1	0	1	1	0	0	0	0	4	5
Female	25	25-29 yr	unmarried	Master's degree or above	<21,000	Private	Tertiary	criti	37-48 hours	<3 years	Yes	Yes	No	No	0	0	0	0	0	1	1	1	1	1	2	1	2	1	3	4	4	1	2	2	2	4	4	3	2	1	1	3	0	1	0	0	0	4	4
Female	26.7	25-29 yr	married	Diploma degree	>29,999	Govt	Tertiary	surg	<37 hours	>5 years	No	Yes	Yes	No	0	2	0	0	0	2	2	2	1	1	1	1	1	1	2	2	1	1	2	2	1	1	1	2	2	1	1	0	0	0	0	1	0	4	2
Female	32.4	>29 yr	married	Bachelor's degree	21,000-29,999	Govt	Secondary	med	37-48 hours	>5 years	No	Yes	No	No	0	3	3	2	0	1	1	1	5	5	1	2	2	5	5	1	7	1	5	5	4	1	7	4	1	3	3	3	2	3	3	3	2	3	2
Female	32	>29 yr	married	Diploma degree	>29,999	Govt	Secondary	criti	37-48 hours	>5 years	No	Yes	Yes	No	0	0	0	0	0	1	1	1	1	1	1	1	1	1	4	3	5	1	1	1	2	1	3	3	2	0	1	1	2	0	0	0	0	4	5
Female	24.2	<25 yr	married	Bachelor's degree	21,000-29,999	Govt	Tertiary	surg	<37 hours	3-5 years	No	Yes	Yes	No	0	0	0	0	0	1	1	1	1	1	1	1	1	1	2	2	2	2	2	2	2	2	2	2	3	0	0	0	0	0	0	0	0	4	3
Female	27	25-29 yr	unmarried	Diploma degree	21,000-29,999	Govt	Tertiary	em	<37 hours	3-5 years	No	Yes	No	No	1	1	0	0	0	2	2	2	2	2	2	2	2	2	5	3	4	2	2	2	4	2	3	3	1	1	2	2	1	1	1	1	1	2	4
Female	33	>29 yr	married	Diploma degree	>29,999	Govt	Tertiary	criti	<37 hours	3-5 years	No	Yes	No	No	0	2	2	0	0	1	2	4	3	3	5	2	5	5	6	5	6	6	7	6	4	6	7	4	0	3	3	2	2	2	1	3	3	4	5
Female	27.6	25-29 yr	married	Diploma degree	>29,999	Govt	Tertiary	surg	<37 hours	>5 years	Yes	Yes	Yes	No	1	2	0	1	0	1	1	2	2	1	2	1	1	1	1	2	1	1	1	2	1	1	1	2	2	0	0	0	0	0	0	0	0	4	3
Female	26	25-29 yr	unmarried	Bachelor's degree	21,000-29,999	Govt	Tertiary	criti	<37 hours	<3 years	Yes	Yes	No	No	0	2	0	0	0	2	2	2	2	3	2	3	2	2	5	4	4	3	2	4	4	2	3	2	2	2	2	3	2	2	2	2	2	4	3
Female	25	25-29 yr	married	Bachelor's degree	<21,000	Private	Tertiary	criti	>48 hours	<3 years	Yes	Yes	Yes	No	2	3	3	0	0	2	5	5	3	5	5	5	5	5	6	7	4	7	7	7	4	4	4	7	0	3	3	3	2	3	3	3	3	1	5
Female	22.4	<25 yr	unmarried	Diploma degree	<21,000	Private	Tertiary	general	>48 hours	<3 years	No	Yes	No	No	0	3	0	3	0	1	2	2	1	5	2	3	2	2	5	5	5	1	2	2	5	3	5	5	1	3	0	1	0	1	1	0	0	1	2
Female	27.4	25-29 yr	unmarried	Diploma degree	21,000-29,999	Govt	Primary	general	<37 hours	3-5 years	No	Yes	Yes	No	0	3	1	0	0	1	2	1	2	1	2	1	3	2	5	4	6	1	4	6	3	2	4	1	2	0	2	1	0	0	0	0	0	4	3
Female	24.5	<25 yr	unmarried	Bachelor's degree	<21,000	Private	Tertiary	med	<37 hours	3-5 years	Yes	Yes	No	No	0	0	0	0	0	1	1	1	1	1	1	1	1	1	1	1	1	1	1	2	1	1	1	1	3	0	0	0	0	0	0	0	0	5	5
Female	29	25-29 yr	unmarried	Diploma degree	21,000-29,999	Govt	Primary	general	37-48 hours	3-5 years	No	Yes	Yes	Yes	0	0	0	0	0	2	5	2	5	2	2	5	5	5	3	3	4	4	4	5	1	1	4	1	3	3	1	0	0	1	0	0	0	5	5
Female	29	25-29 yr	married	Diploma degree	21,000-29,999	Govt	Tertiary	med	<37 hours	3-5 years	Yes	Yes	No	No	0	0	0	0	0	1	3	1	1	1	1	1	1	1	1	1	1	1	1	1	1	1	1	1	3	0	0	0	1	0	0	0	0	5	5
Female	45	>29 yr	married	Bachelor's degree	>29,999	Govt	Tertiary	criti	<37 hours	>5 years	No	Yes	No	No	1	1	0	1	1	2	2	2	3	3	2	2	3	2	4	4	4	3	3	4	5	2	4	2	1	1	1	1	1	1	1	1	1	5	4
Female	32	>29 yr	married	Bachelor's degree	>29,999	Govt	Secondary	gyn	37-48 hours	>5 years	Yes	Yes	No	No	3	3	0	1	0	2	5	1	5	2	1	1	1	2	5	4	3	4	7	4	4	3	6	1	3	0	1	1	1	1	0	1	1	5	5
Female	26	25-29 yr	unmarried	Bachelor's degree	21,000-29,999	Govt	Tertiary	general	37-48 hours	<3 years	No	Yes	No	No	0	3	0	0	0	2	2	2	2	4	2	2	2	2	6	6	6	1	7	6	4	6	4	6	2	3	1	2	3	2	1	1	0	4	2
Female	25	25-29 yr	married	Diploma degree	<21,000	Private	Tertiary	general	37-48 hours	<3 years	No	No	No	No	0	3	3	0	0	2	2	3	1	2	1	2	2	2	4	7	4	4	4	4	4	1	7	4	1	3	0	0	0	1	0	0	0	1	1
Female	22	<25 yr	unmarried	Diploma degree	<21,000	Private	Tertiary	gyn	37-48 hours	<3 years	Yes	Yes	Yes	Yes	0	0	0	0	0	2	2	2	2	2	2	2	2	2	3	2	2	1	2	2	2	1	7	4	2	1	1	1	1	1	0	1	0	4	4
Female	26	25-29 yr	unmarried	Bachelor's degree	>29,999	Private	Primary	em	37-48 hours	<3 years	Yes	Yes	No	Yes	0	1	2	0	0	1	1	1	1	1	1	1	1	1	4	2	2	1	1	1	3	1	2	1	1	0	0	1	0	0	0	0	0	3	4
Female	28	25-29 yr	married	Master's degree or above	>29,999	Govt	Tertiary	gyn	<37 hours	3-5 years	No	Yes	No	No	0	3	2	0	0	4	5	5	5	5	5	4	4	2	6	5	5	6	6	6	5	5	5	5	3	3	3	3	3	3	3	3	3	2	2
Female	23	<25 yr	unmarried	Diploma degree	<21,000	Private	Tertiary	criti	<37 hours	<3 years	Yes	Yes	No	No	0	3	1	0	0	3	2	2	1	5	2	1	2	1	7	7	5	5	4	4	7	3	5	7	3	3	3	3	2	3	0	2	0	4	4
Female	21.5	<25 yr	unmarried	Diploma degree	<21,000	Private	Secondary	med	<37 hours	<3 years	Yes	Yes	Yes	Yes	0	0	0	0	1	2	1	2	1	2	2	2	2	1	1	3	4	3	4	3	3	4	4	4	3	0	0	0	0	0	0	0	0	4	4
Female	24	<25 yr	married	Diploma degree	21,000-29,999	Govt	Primary	gyn	<37 hours	<3 years	No	Yes	No	No	0	3	3	0	0	5	4	5	5	5	5	5	5	5	4	4	5	4	5	6	4	7	7	1	3	1	1	1	0	1	0	0	0	5	5
Female	34.6	>29 yr	married	Bachelor's degree	>29,999	Govt	Tertiary	gyn	<37 hours	>5 years	No	Yes	No	Yes	0	1	0	0	0	2	2	1	2	5	5	4	5	3	4	5	5	5	5	5	5	5	5	6	1	2	2	1	0	2	1	1	2	3	3
Female	23.3	<25 yr	unmarried	Diploma degree	<21,000	Private	Tertiary	med	37-48 hours	<3 years	Yes	Yes	Yes	Yes	1	0	0	0	0	1	1	1	1	1	2	2	1	1	4	3	2	1	1	2	2	1	6	1	2	0	3	0	0	0	0	0	0	4	4
Female	24.5	<25 yr	married	Diploma degree		Private	Tertiary	med	<37 hours	<3 years	No	Yes	Yes	No	0	0	0	0	0	1	1	1	1	1	1	1	1	1	1	1	1	1	1	1	1	1	1	1	0	0	0	0	0	0	0	0	0	5	5
Female	24	<25 yr	unmarried	Diploma degree	<21,000	Private	Tertiary	criti	<37 hours	3-5 years	Yes	Yes	No	No	0	1	0	1	0	2	5	1	5	4	2	1	4	3	5	5	5	1	4	6	6	3	7	4	1	2	2	2	2	1	3	2	0	3	2
Female	25	25-29 yr	married	Bachelor's degree	21,000-29,999	Govt	Primary	med	37-48 hours	<3 years	No	No	No	No	0	3	3	3	3	2	2	2	2	2	2	2	2	2	6	5	4	5	4	4	3	4	4	4	2	1	0	0	0	1	1	0	0	3	4
Female	28.2	25-29 yr	married	Diploma degree	<21,000	Private	Tertiary	gyn	37-48 hours	3-5 years	Yes	Yes	No	No	3	1	0	0	0	1	1	1	1	2	1	1	1	1	5	3	1	1	1	2	4	1	1	2	3	0	1	2	0	0	0	0	0	4	4
Female	42.3	>29 yr	married	Diploma degree	>29,999	Govt	Tertiary	criti	37-48 hours	>5 years	No	Yes	No	No	0	3	2	0	0	5	5	5	1	5	5	5	5	1	7	7	7	7	1	7	7	7	7	7	3	1	3	3	1	3	0	3	2	4	3
Female	24	<25 yr	unmarried	Diploma degree	<21,000	Private	Tertiary	criti	<37 hours	3-5 years	Yes	Yes	No	Yes	0	1	0	1	0	2	5	1	5	4	2	1	4	3	5	5	5	1	4	6	6	3	7	4	1	2	2	2	2	1	3	2	0	3	2
Female	22	<25 yr	married	Diploma degree	<21,000	Private	Primary	criti	37-48 hours	3-5 years	No	No	No	No	2	3	3	3	2	5	5	5	5	5	5	5	5	5	7	7	5	6	7	7	1	1	7	6	3	3	1	3	2	0	3	3	0	1	2
Female	31	>29 yr	married	Master's degree or above	21,000-29,999	Govt	Tertiary	criti	37-48 hours	>5 years	Yes	Yes	Yes	Yes	0	1	0	0	0	2	2	1	2	2	2	2	2	2	3	2	2	2	3	3	2	2	1	2	3	1	2	2	1	2	1	1	1	5	5
Female	26	25-29 yr	married	Master's degree or above	21,000-29,999	Private	Tertiary	criti	>48 hours	3-5 years	Yes	Yes	No	No	1	3	0	1	0	1	2	1	1	2	2	4	4	2	5	4	3	3	3	3	4	4	5	4	1	1	1	2	0	3	1	0	2	3	3
Female	27.6	25-29 yr	married	Diploma degree	21,000-29,999	Govt	Tertiary	gyn	<37 hours	>5 years	No	Yes	Yes	No	2	2	1	0	0	2	2	3	3	3	2	2	2	2	1	1	1	1	1	1	1	1	2	2	2	0	0	0	1	1	0	0	0	4	4
Female	29	25-29 yr	married	Bachelor's degree	21,000-29,999	Govt	Tertiary	criti	<37 hours	3-5 years	No	Yes	No	No	2	2	0	0	0	2	1	2	3	2	1	1	2	2	6	6	6	2	6	7	4	2	5	4	0	1	0	2	0	0	0	0	1	4	4
Female	25.3	25-29 yr	unmarried	Diploma degree	<21,000	Private	Secondary	general	37-48 hours	<3 years	Yes	No	No	No	0	3	2	0	0	1	5	1	5	5	3	1	5	5	5	1	4	1	7	4	4	3	7	7	2	3	2	0	1	0	3	3	3	1	5
Female	25	25-29 yr	married	Diploma degree	21,000-29,999	Govt	Tertiary	med	37-48 hours	<3 years	Yes	Yes	No	No	0	3	0	0	0	1	1	1	1	1	1	1	1	1	1	4	3	1	1	3	2	1	7	1	1	1	1	1	0	1	1	1	0	3	4
Female	25	25-29 yr	unmarried	Diploma degree	<21,000	Private	Tertiary	gyn	<37 hours	3-5 years	Yes	Yes	No	No	0	1	0	0	0	2	1	1	1	2	2	2	2	2	4	3	3	2	2	4	2	2	2	1	1	2	2	1	1	1	1	1	1	4	4
Female	24	<25 yr	married	Diploma degree	<21,000	Private	Tertiary	criti	37-48 hours	<3 years	Yes	Yes	Yes	Yes	1	3	0	0	0	1	2	2	1	5	5	2	2	2	7	3	4	1	1	3	5	3	7	1	3	1	3	2	3	0	0	2	0	4	3
Female	25	25-29 yr	married	Diploma degree	21,000-29,999	Govt	Tertiary	med	37-48 hours	<3 years	No	Yes	No	No	0	3	3	0	0	2	2	2	1	3	2	2	2	2	1	4	3	1	1	3	2	1	7	1	1	1	1	1	0	1	1	1	0	3	4
Female	40	>29 yr	married	Bachelor's degree	>29,999	Govt	Tertiary	gyn	37-48 hours	>5 years	Yes	Yes	No	No	0	1	0	2	0	1	2	1	1	2	2	5	1	1	3	1	2	2	1	3	2	1	3	1	3	0	0	1	0	2	1	0	0	4	4
Female	28.8	25-29 yr	married	Bachelor's degree	21,000-29,999	Govt	Tertiary	surg	<37 hours	3-5 years	No	Yes	Yes	No	0	3	1	0	0	1	1	2	2	2	5	2	5	2	3	4	1	3	4	2	3	5	3	1	1	1	1	2	0	0	0	0	0	4	4
Female	30.8	>29 yr	married	Master's degree or above	>29,999	Govt	Tertiary	med	<37 hours	>5 years	No	Yes	No	No	0	0	0	0	0	2	2	2	2	2	2	4	2	2	4	4	4	4	4	4	4	4	4	4	1	1	1	1	1	1	1	1	0	3	3
Female	33	>29 yr	married	Master's degree or above	>29,999	Govt	Tertiary	em		>5 years	No	Yes	No	No	0	0	0	0	0	1	1	1	1	1	1	1	1	1	2	1	1	1	1	1	1	1	1	1	0	0	0	0	0	0	0	0	0	5	5
Female	29.2	25-29 yr	married	Diploma degree	21,000-29,999	Govt	Tertiary	criti	<37 hours	>5 years	Yes	Yes	Yes	No	0	1	1	0	0	2	2	2	2	1	2	1	2	2	2	1	1	1	1	1	4	4	4	1	0	1	3	2	2	0	3	0	0	5	5
Female	27.4	25-29 yr	married	Bachelor's degree	21,000-29,999	Govt	Tertiary	gyn	<37 hours	3-5 years	No	Yes	No	Yes	1	0	0	0	0	2	1	1	1	2	5	2	1	1	1	1	2	1	1	1	2	1	2	1	3	0	0	0	0	0	0	0	0	4	4
Female	27	25-29 yr	unmarried	Diploma degree	21,000-29,999	Govt	Tertiary	criti	<37 hours	3-5 years	Yes	Yes	Yes	No	2	0	0	0	0	2	2	2	3	3	2	3	2	2	6	2	2	3	3	4	3	4	4	4	1	1	2	2	1	1	1	1	1	2	4
Female	26	25-29 yr	unmarried	Bachelor's degree	<21,000	Private	Tertiary	criti	<37 hours	<3 years	No	Yes	No	No	0	2	1	0	1	1	2	2	2	2	1	1	2	1	5	4	4	3	4	4	3	3	5	2	3	1	1	1	1	0	1	1	0	2	2
Female	22.9	<25 yr	unmarried	Diploma degree	<21,000	Private	Secondary	general	37-48 hours	<3 years	Yes	Yes	Yes	Yes	0	0	0	0	0	1	1	1	1	1	2	1	1	1	4	1	1	1	3	1	3	1	4	4	2	0	0	0	0	1	0	0	0	3	3
Female	24	<25 yr	unmarried	Diploma degree	<21,000	Private	Tertiary	surg	37-48 hours	<3 years	No	No	No	No	0	3	3	0	0	1	1	1	5	1	1	1	5	1	7	1	3	1	2	5	2	1	4	1	1	1	1	3	2	0	0	0	0	3	2
Female	26	25-29 yr	married	Bachelor's degree	<21,000	Private	Tertiary	general	37-48 hours	<3 years	No	Yes	No	No	1	0	0	0	0	1	1	1	1	1	2	1	1	1	4	3	3	5	3	4	2	1	3	2	1	1	3	1	2	1	1	0	0	3	1
Female	25.8	25-29 yr	unmarried	Diploma degree	21,000-29,999	Private	Tertiary	general	>48 hours	<3 years	Yes	Yes	Yes	No	0	3	0	0	0	1	2	2	2	2	3	2	3	1	6	7	7	1	6	6	6	6	7	2	1	2	2	2	2	2	0	0	0	1	2
Female	30	>29 yr	married	Bachelor's degree	<21,000	Private	Secondary	criti	37-48 hours	>5 years	Yes	No	No	No	0	0	0	0	0	4	1	1	1	1	2	1	1	1	4	1	1	1	1	1	4	1	4	1	2	0	2	2	2	0	0	0	0	5	2
Female	26	25-29 yr	unmarried	Bachelor's degree	21,000-29,999	Govt	Tertiary	med	<37 hours	<3 years	Yes	Yes	Yes	No	0	3	0	0	0	1	1	2	1	2	1	2	1	1	3	4	4	1	3	6	3	2	4	2	1	2	2	1	1	2	2	0	0	5	4
Female	24.4	<25 yr	married	Bachelor's degree	<21,000	Private	Tertiary	em	37-48 hours	<3 years	No	No	No	No	1	3	3	1	0	5	5	5	5	5	4	3	4	4	7	5	6	3	6	6	3	5	7	5	2	2	2	2	3	3	3	1	3	4	3
Female	30	>29 yr	married	Bachelor's degree	>29,999	Govt	Tertiary	surg	<37 hours	>5 years	Yes	Yes	No	No	0	0	0	0	0	2	3	1	1	1	1	5	1	1	3	1	2	1	1	2	2	1	3	1	3	1	1	1	0	2	0	1	0	3	3
Female	40.3	>29 yr	married	Master's degree or above	>29,999	Govt	Secondary	gyn	37-48 hours	>5 years	No	Yes	No	No	1	2	0	0	0	2	1	1	1	1	1	1	1	1	3	4	4	3	3	4	4	3	1	1	3	0	0	1	1	0	0	0	0	5	5
Female	28	25-29 yr	unmarried	Bachelor's degree	21,000-29,999	Govt	Tertiary	criti	<37 hours	3-5 years	No	Yes	No	No	1	3	1	3	0	1	1	1	2	2	1	2	1	1	4	4	4	3	3	5	4	1	4	1	2	2	2	2	1	3	2	0	2	3	3
Female	29	25-29 yr	married	Diploma degree	>29,999	Govt	Tertiary	med	<37 hours	3-5 years	Yes	Yes	No	No	1	2	0	0	0	2	2	1	3	2	2	2	2	1	4	2	3	2	3	2	3	2	3	2	1	0	1	1	1	0	1	1	1	5	4
Female	30	>29 yr	married	Bachelor's degree	21,000-29,999	Private	Tertiary	general	<37 hours	>5 years	Yes	Yes	No	No	0	1	0	0	0	1	1	1	1	2	2	1	2	1	4	7	7	7	7	7	3	4	5	1	3	2	3	1	1	1	0	0	0	3	4
Female	26.4	25-29 yr	unmarried	Diploma degree	21,000-29,999	Govt	Tertiary	criti	37-48 hours	<3 years	Yes	Yes	No	No	0	3	3	0	0	2	2	2	1	2	2	2	2	2	3	4	3	1	6	6	5	2	2	1	2	2	3	2	2	3	1	2	2	3	4
Female	27	25-29 yr	unmarried	Diploma degree	21,000-29,999	Private	Tertiary	criti	<37 hours	>5 years	Yes	Yes	No	No	0	3	0	0	0	2	3	4	5	4	5	4	4	4	6	6	6	1	6	6	1	1	4	7	3	3	1	2	1	1	1	0	0	2	4
Female	26	25-29 yr	married	Diploma degree	21,000-29,999	Private	Secondary	criti	37-48 hours	3-5 years	Yes	No	No	No	0	3	3	0	0	2	5	2	2	1	2	2	2	2	4	5	4	4	4	5	3	3	5	4	3	1	1	1	3	1	1	0	1	4	4
Female	25	25-29 yr	unmarried	Bachelor's degree	<21,000	Private	Tertiary	general	>48 hours	<3 years	Yes	Yes	Yes	Yes	0	0	0	0	0	2	2	2	2	2	3	2	2	2	3	4	4	1	4	3	1	1	4	4	3	1	0	0	0	1	0	0	0	3	3
Female	25.3	25-29 yr	unmarried	Diploma degree	21,000-29,999	Private	Primary	med	<37 hours	>5 years	Yes	Yes	Yes	Yes	0	0	1	3	1	1	2	2	3	3	2	4	1	5	3	4	2	4	4	3	6	1	5	3	2	0	2	1	1	1	3	3	0	3	3
Female	24.9	<25 yr	unmarried	Bachelor's degree	<21,000	Private	Tertiary	surg	37-48 hours	<3 years	No	No	No	No	0	2	0	0	0	1	1	2	1	1	1	1	1	1	4	4	4	1	3	4	3	3	7	4	0	2	3	2	1	3	2	0	1	2	1
Female	23	<25 yr	unmarried	Diploma degree	<21,000	Private	Tertiary	gyn	37-48 hours	<3 years	No	No	No	No	0	3	3	0	0	3	5	5	5	5	5	5	5	1	4	5	2	1	5	4	5	1	1	1	3	2	2	2	2	2	3	0	0	4	4
Female	26	25-29 yr	unmarried	Master's degree or above	21,000-29,999	Govt	Tertiary	med	37-48 hours	<3 years	Yes	Yes	No	No	1	3	0	0	0	2	1	1	1	2	2	2	2	1	4	4	3	1	3	4	3	4	5	2	1	3	2	1	1	1	0	1	1	4	4
Female	23.2	<25 yr	unmarried	Diploma degree	21,000-29,999	Private	Tertiary	criti	<37 hours	<3 years	Yes	Yes	Yes	No	0	0	0	0	0	1	1	1	1	1	1	1	1	1	1	1	1	1	1	1	1	2	1	1	0	0	0	0	0	0	0	0	0	1	1
Female	25.8	25-29 yr	unmarried	Bachelor's degree	21,000-29,999	Private	Tertiary	general	>48 hours	<3 years	Yes	Yes	Yes	Yes	0	3	0	0	0	2	5	5	4	4	5	5	5	5	4	7	6	1	7	7	3	7	2	7	3	3	0	1	0	0	0	0	0	2	5
Female	30	>29 yr	married	Master's degree or above	21,000-29,999	Govt	Tertiary	surg	<37 hours	3-5 years	No	Yes	No	No	0	0	0	1	0	2	2	2	2	1	1	2	3	2	7	6	7	4	6	7	6	6	4	6	0	3	3	3	3	1	1	1	2	1	2
Female	29	25-29 yr	married	Master's degree or above	21,000-29,999	Govt	Tertiary	gyn	<37 hours	<3 years	No	Yes	No	No	0	2	1	0	0	2	2	1	1	2	2	2	2	1	4	1	1	1	3	1	3	3	4	1	3	0	1	0	0	0	0	0	0	4	5
Female	40	>29 yr	married	Diploma degree	>29,999	Govt	Tertiary	med	<37 hours	>5 years	Yes	Yes	No	No	0	0	0	0	0	2	3	1	1	1	1	5	1	1	3	1	2	1	1	1	2	1	3	1	3	1	1	1	0	2	0	1	0	3	3
Female	24	<25 yr	married	Diploma degree	21,000-29,999	Private	Tertiary	criti	<37 hours	<3 years	Yes	Yes	Yes	Yes	0	0	0	0	0	1	1	1	1	1	2	2	2	2	4	4	4	1	1	1	4	1	4	1	3	0	2	1	0	0	1	0	0	4	3
Female	24	<25 yr	unmarried	Bachelor's degree	21,000-29,999	Private	Primary	med	>48 hours	<3 years	No	No	No	No	0	3	1	2	0	4	3	3	4	2	2	2	1	3	5	6	6	2	6	6	4	5	7	4	2	2	2	1	2	3	3	0	3	2	2
Female	25	25-29 yr	married	Bachelor's degree		Private	Tertiary	med	<37 hours	3-5 years	No	Yes	Yes	No	0	0	0	0	0	1	1	1	1	1	1	1	1	1	1	1	1	1	1	1	1	1	1	1	3	0	0	0	0	0	0	0	0	5	5
Female	25	25-29 yr	unmarried	Diploma degree	21,000-29,999	Private	Secondary	criti	<37 hours	3-5 years	Yes	Yes	No	Yes	0	0	0	0	0	2	1	1	1	4	1	1	1	1	3	3	3	1	3	3	5	3	2	3	3	0	1	1	0	1	1	0	1	1	4
Female	22	<25 yr	unmarried	Diploma degree	21,000-29,999	Govt	Tertiary	gyn	37-48 hours	<3 years	Yes	Yes	No	No	3	3	2	1	0	2	2	3	1	3	4	1	1	3	5	3	3	1	4	3	4	2	4	1	3	0	3	2	3	1	0	3	0	5	3
Female	24	<25 yr	unmarried	Diploma degree	21,000-29,999	Govt	Tertiary	general	<37 hours	<3 years	Yes	Yes	No	No	0	0	0	0	0	1	1	1	1	1	2	2	1	1	4	3	4	1	4	3	3	1	3	1	2	0	0	0	2	0	0	1	0	5	5
Female	34	>29 yr	married	Diploma degree	>29,999	Private	Primary	em	37-48 hours	>5 years	No	Yes	No	Yes	0	3	2	2	0	2	2	2	2	2	2	2	2	2	4	4	4	4	4	4	3	4	4	4	3	1	0	1	0	3	1	1	1	3	3
Female	27	25-29 yr	unmarried	Bachelor's degree	21,000-29,999	Govt	Tertiary	criti	37-48 hours	3-5 years	Yes	Yes	No	No	0	0	0	0	1	1	2	2	2	4	2	2	2	1	5	4	4	1	3	5	3	1	4	5	2	2	0	0	0	0	2	0	0	4	3
Female	29.8	25-29 yr	married	Diploma degree	>29,999	Govt	Tertiary	med	37-48 hours	>5 years	No	Yes	No	No	0	0	0	0	0	1	1	1	1	1	1	3	1	2	5	1	1	1	7	5	1	1	1	1	2	1	2	1	2	0	2	0	0	5	5
Female	27	25-29 yr	married	Diploma degree	21,000-29,999	Govt	Tertiary	em	37-48 hours	3-5 years	Yes	Yes	No	No	1	1	0	0	0	2	2	2	3	3	3	1	2	2	7	4	4	4	3	3	4	2	3	3	3	2	0	0	2	1	0	0	1	4	3
Female	33	>29 yr	married	Bachelor's degree	>29,999	Govt	Tertiary	surg	<37 hours	>5 years	No	Yes	No	No	1	2	0	0	0	2	2	1	3	2	2	2	2	1	4	2	3	2	3	2	3	2	3	2	1	0	1	1	1	0	1	1	1	5	4
Female	28	25-29 yr	unmarried	Bachelor's degree	21,000-29,999	Govt	Tertiary	em	37-48 hours	3-5 years	Yes	Yes	No	No	1	0	0	2	2	2	2	2	3	3	3	1	2	2	4	2	2	1	2	3	3	3	4	3	2	0	1	0	0	0	1	0	1	3	3
Female	24.5	<25 yr	married	Bachelor's degree	<21,000	Private	Tertiary	surg	37-48 hours	<3 years	No	Yes	No	No	0	3	1	0	0	2	2	1	2	2	4	2	4	2	5	4	4	3	3	4	5	4	5	4	1	1	2	1	1	1	1	0	1	2	2
Female	24.8	<25 yr	married	Diploma degree	21,000-29,999	Private	Tertiary	criti	37-48 hours	<3 years	Yes	Yes	No	No	0	1	0	0	0	1	1	1	1	1	2	2	1	1	4	4	4	1	4	4	4	4	4	4	3	1	1	1	1	1	0	1	0	3	3
Female	22.8	<25 yr	unmarried	Diploma degree	21,000-29,999	Govt	Tertiary	general	<37 hours	<3 years	Yes	Yes	Yes	Yes	0	0	0	0	0	1	1	1	1	1	5	1	1	1	4	1	1	1	3	3	4	1	1	1	1	1	1	1	1	1	1	1	0	5	5
Female	24	<25 yr	unmarried	Bachelor's degree	<21,000	Private	Tertiary	surg	<37 hours	<3 years	No	No	No	No	0	0	0	0	0	1	2	1	2	1	2	1	2	1	2	7	7	7	1	7	2	1	1	3	0	3	0	1	0	0	0	0	0	2	1
Female	24	<25 yr	unmarried	Diploma degree	<21,000	Private	Secondary	surg	37-48 hours	3-5 years	Yes	No	No	No	0	3	3	0	0	1	2	2	2	2	2	1	2	1	3	5	1	2	1	4	1	1	7	1	2	1	3	1	0	0	3	0	0	4	2
Female	33.2	>29 yr	married	Bachelor's degree	21,000-29,999	Govt	Tertiary	surg	<37 hours	>5 years	No	Yes	No	No	0	0	0	0	0	2	2	2	2	2	3	2	4	2	4	3	4	3	5	3	3	4	4	3	1	1	1	1	1	1	1	1	1	3	3
Female	29.6	25-29 yr	married	Diploma degree	21,000-29,999	Govt	Tertiary	med	<37 hours	>5 years	No	Yes	Yes	No	1	1	1	0	0	2	2	2	2	2	2	2	2	1	1	1	1	1	1	1	1	1	2	1	2	0	0	0	1	0	0	0	0	4	4
Female	33	>29 yr	married	Bachelor's degree	>29,999	Govt	Tertiary	surg	37-48 hours	>5 years	Yes	Yes	No	No	0	0	0	0	0	2	3	1	1	1	1	5	1	1	3	1	2	1	1	2	2	1	4	1	3	1	1	1	0	2	0	1	0	3	3
Female	25	25-29 yr	unmarried	Diploma degree	21,000-29,999	Private	Secondary	med	>48 hours	3-5 years	Yes	Yes	No	Yes	0	0	1	0	0	2	2	2	1	2	2	1	2	1	5	4	5	1	3	4	3	1	4	4	0	1	3	1	3	3	3	1	0	3	3
Female	46	>29 yr	married	Master's degree or above	>29,999	Govt	Tertiary	gyn	37-48 hours	>5 years	Yes	Yes	No	No	0	3	0	0	0	2	2	2	2	2	2	2	2	2	1	1	1	1	7	7	1	1	7	1	3	0	0	0	0	3	0	0	0	5	5
Female	40	>29 yr	married	Master's degree or above	>29,999	Govt	Tertiary	general	37-48 hours	>5 years	Yes	Yes	Yes	No	0	0	0	0	0	1	1	1	1	1	1	1	1	1	3	1	1	1	1	1	3	1	1	1	3	0	0	3	3	3	3	3	3	2	3
Female	30	>29 yr	married	Bachelor's degree	>29,999	Govt	Tertiary	criti	<37 hours	>5 years	No	Yes	No	No	1	1	0	0	0	2	2	1	2	1	2	1	2	2	4	3	3	1	3	3	3	1	3	1	2	1	1	1	0	2	0	1	1	4	4
Female	36	>29 yr	married	Bachelor's degree	>29,999	Govt	Tertiary	surg	<37 hours	>5 years	No	Yes	Yes	No	0	2	1	0	0	2	2	2	2	1	3	2	4	2	6	6	6	5	6	6	6	6	5	4	2	1	1	1	1	0	1	1	1	4	3
Female	23.2	<25 yr	unmarried	Diploma degree	<21,000	Private	Tertiary	criti	37-48 hours	<3 years	No	No	No	Yes	0	3	0	0	0	2	1	1	5	5	5	1	1	1	1	2	4	3	4	4	4	3	4	4	1	1	0	1	0	0	0	1	0	2	3
Female	23.4	<25 yr	married	Diploma degree	<21,000	Private	Tertiary	criti	<37 hours	<3 years	No	Yes	No	No	0	2	1	0	0	2	2	1	1	2	2	2	1	2	5	6	4	4	4	4	1	2	4	4	1	1	1	2	0	1	0	0	1	3	2
Female	25	25-29 yr	unmarried	Bachelor's degree	<21,000	Private	Tertiary	med	37-48 hours	<3 years	No	Yes	No	No	2	0	0	0	0	1	1	1	1	1	1	1	1	1	7	2	3	1	1	3	3	1	5	2	1	1	2	2	2	2	1	2	2
Female	25	25-29 yr	married	Bachelor's degree	21,000-29,999	Govt	Tertiary	surg	37-48 hours	3-5 years	No	Yes	No	No	3	3	2	0	0	1	2	2	2	2	2	5	2	1	7	6	6	6	5	6	4	6	7	4	3	3	0	3	2	3	3	0	3	4	5
Female	45	>29 yr	married	Master's degree or above	>29,999	Govt	Tertiary	criti	<37 hours	>5 years	No	Yes	No	No	1	2	0	0	0	2	2	1	3	2	2	2	2	1	4	2	3	2	3	2	3	2	3	2	1	0	1	1	1	0	1	1	1	5	4
Female	29	25-29 yr	unmarried	Diploma degree	21,000-29,999	Govt	Primary	med	<37 hours	>5 years	No	Yes	No	No	0	2	0	1	0	2	1	1	2	2	2	1	1	1	3	2	3	1	4	4	3	2	4	2	1	1	1	0	1	1	1	0	1	4	4
Female	34.7	>29 yr	married	Diploma degree	21,000-29,999	Govt	Tertiary	med	37-48 hours	>5 years	Yes	Yes	No	No	0	0	0	0	0	1	1	1	1	1	1	2	1	1	3	1	1	1	1	1	4	1	4	1	3	0	1	0	0	0	2	0	0	5	5
Female	24.8	<25 yr	unmarried	Diploma degree	<21,000	Private	Primary	criti	37-48 hours	<3 years	Yes	Yes	No	No	0	0	0	0	0	1	1	1	1	1	1	2	1	1	1	1	1	1	1	1	1	1	1	1	0	0	0	0	0	0	0	0	0	4	4
Female	26	25-29 yr	unmarried	Diploma degree	21,000-29,999	Govt	Tertiary	criti	<37 hours	3-5 years	No	Yes	No	No	1	2	0	0	0	2	2	1	3	2	2	2	2	1	4	2	3	2	3	2	3	2	3	2	1	0	1	1	1	0	1	1	1	5	4
Female	22	<25 yr	married	Diploma degree	<21,000	Private	Tertiary	med	<37 hours	<3 years	Yes	Yes	No	Yes	0	2	0	0	0	1	1	1	1	1	3	1	1	1	4	4	1	1	4	3	3	3	3	1	3	0	3	3	0	0	0	0	0	2	5
Female	26	25-29 yr	unmarried	Bachelor's degree	<21,000	Private	Tertiary	med	37-48 hours	<3 years	Yes	Yes	No	No	2	1	1	0	0	1	1	5	3	5	5	5	5	1	7	4	3	4	4	4	4	5	4	4	2	3	2	1	2	3	3	3	3	4	3
Female	24	<25 yr	unmarried	Bachelor's degree	<21,000	Private	Tertiary	gyn	<37 hours	>5 years	Yes	Yes	No	Yes	0	3	3	0	0	1	2	2	2	5	2	2	2	2	6	5	4	1	3	4	3	3	3	7	0	3	2	0	0	0	0	3	0	2	2
Female	32.4	>29 yr	married	Bachelor's degree	>29,999	Govt	Tertiary	surg	<37 hours	>5 years	No	Yes	Yes	No	0	0	0	0	0	2	2	2	4	4	3	1	1	1	3	3	3	1	2	3	2	2	2	3	2	0	0	0	0	1	0	0	0	4	3
Female	29.2	25-29 yr	married	Bachelor's degree	>29,999	Govt	Tertiary	med	<37 hours	3-5 years	No	Yes	No	No	0	1	0	0	0	2	2	2	2	1	4	1	4	2	3	4	5	3	4	4	2	4	3	4	1	1	2	1	2	2	0	1	1	3	2
Female	25	25-29 yr	married	Bachelor's degree	<21,000	Private	Tertiary	med	37-48 hours	<3 years	No	Yes	No	No	0	3	1	0	0	3		1	2	1	1	1	1	1	6	3	2	4	2	3	3	5	7	1	1	0	3	2	2	1	2	1	0	3	2
Female	26.9	25-29 yr	unmarried	Bachelor's degree	21,000-29,999	Govt	Tertiary	surg	<37 hours	3-5 years	Yes	Yes	Yes	No	0	1	2	0	0	2	2	2	2	3	3	2	2	2	2	2	2	1	1	2	1	1	1	5	1	1	2	0	0	0	0	1	0	3	3
Female	29	25-29 yr	married	Diploma degree	>29,999	Govt	Tertiary	criti	37-48 hours	>5 years	No	Yes	No	Yes	0	3	3	1	0	3	3	1	4	1	1				1	1	1	1	1	2	1	1	3	2	3	2	3	2	2	0	0	0	0	4	5
Female	23.6	<25 yr	unmarried	Diploma degree	<21,000	Private	Secondary	med	37-48 hours	<3 years	No	Yes	No	No	0	1	2	0	0	4	1	3	4	4	3	5	2	1	7	1	1	1	2	4	3	4	3	1	3	0	0	3	0	1	1	0	0	2	4
Female	40.7	>29 yr	married	Bachelor's degree	>29,999	Govt	Tertiary	med	<37 hours	>5 years	No	Yes	No	No	0	2	1	0	0	2	1	2	2	2	4	2	3	2	2	2	3	2	2	2	2	2	2	2	2	1	1	1	1	1	1	1	1	4	3
Female	38	>29 yr	married	Diploma degree	21,000-29,999	Govt	Tertiary	med	<37 hours	>5 years	Yes	Yes	No	No	0	3	1	0	0	5	5	1	5	2	2	5	2	2	4	7	7	5	7	7	5	5	5	3	2	3	3	3	2	3	3	1	3	5	5
Female	25.6	25-29 yr	unmarried	Diploma degree	21,000-29,999	Govt	Secondary	general	<37 hours	3-5 years	Yes	Yes	No	No	0	3	0	0	0	2	2	1	1	2	2	1	1	1	4	3	1	1	5	1	6	5	4	1	3	0	1	1	2	0	0	0	0	5	5
Female	22.4	<25 yr	married	Diploma degree	<21,000	Private	Secondary	med	>48 hours	<3 years	No	No	No	No	0	3	0	0	0	1	1	1	1	2	2	5	2	5	1	4	4	3	4	4	3	1	1	1	2	0	0	1	0	0	3	0	0	2	4
Female	30	>29 yr	married	Bachelor's degree	>29,999	Govt	Tertiary	criti	<37 hours	3-5 years	No	Yes	No	No	1	1	0	0	0	2	2	3	2	2	2	2	2	2	5	2	4	1	2	3	3	3	4	3	3	2	2	2	2	2	2	2	2	4	3
Female	29	25-29 yr	married	Master's degree or above	>29,999	Govt	Tertiary	general	<37 hours	3-5 years	Yes	Yes	No	No	0	2	0	0	0	2	2	2	2	2	2	2	2	1	3	3	3	3	3	1	3	1	3	1	3	0	0	0	0	0	0	0	0	5	5
Female	27.2	25-29 yr	unmarried	Master's degree or above	21,000-29,999	Govt	Tertiary	criti	37-48 hours	3-5 years	No	Yes	No	No	0	0	0	0	0	1	1	1	1	1	2	1	2	1	5	4	4	1	4	1	3	1	7	1	3	1	1	1	0	0	0	0	0	4	5
Female	25	25-29 yr	married	Diploma degree	<21,000	Private	Primary	gyn	37-48 hours	3-5 years	Yes	Yes	No	No	0	3	3	3	0	2	2	2	2	1	4	4	4	4	3	3	3	1	4	4	3	1	3	4	2	1	0	1	0	2	1	1	1	3	3
Female	24	<25 yr	married	Diploma degree	>29,999	Private	Primary	general	37-48 hours	<3 years	No	Yes	No	No	0	1	0	0	0	2	2	2	2	1	1	1	1	1	7	5	5	4	4	4	4	2	3	4	2	1	1	1	1	1	1	0	0	4	3
Female	35.2	>29 yr	married	Bachelor's degree	>29,999	Govt	Tertiary	gyn	<37 hours	>5 years	No	Yes	Yes	No	0	2	0	0	0	2	2	1	2	1	3	2	4	2	4	4	5	5	5	4	3	3	4	3	1	1	1	1	1	1	1	1	1	4	3
Female	30	>29 yr	married	Bachelor's degree	>29,999	Govt	Tertiary	general	<37 hours	>5 years	No	Yes	No	No	1	1	1	0	0	2	2	2	2	2	2	2	2	2	7	4	6	2	3	5	4	4	6	7	1	1	2	2	2	1	0	0	2	5	5
Female	30.8	>29 yr	unmarried	Bachelor's degree	21,000-29,999	Govt	Tertiary	gyn	37-48 hours	3-5 years	Yes	No	No	No	0	3	3	0	0	2	5	2	5	5	2	2	5	2	4	7	7	4	5	7	3	4	7	5	0	3	3	2	2	3	1	0	3	2	2
Female	25.2	25-29 yr	married	Bachelor's degree	<21,000	Private	Tertiary	criti	<37 hours	3-5 years	Yes	Yes	No	No	0	0	0	0	0	2	2	2	2	5	2	2	2	1	7	7	7	2	3	3	5	7	7	3	2	2	1	3	0	1	3	0	0	3	1
Female	23.2	<25 yr	unmarried	Bachelor's degree	<21,000	Private	Tertiary	criti	<37 hours	3-5 years	No	Yes	No	No	0	1	1	0	0	1	1	2	1	2	2	1	1	2	4	4	5	3	5	3	2	3	1	2	1	1	1	1	0	0	0	1	0	3	2
Female	27	25-29 yr	married	Master's degree or above	21,000-29,999	Govt	Secondary	criti	<37 hours	>5 years	No	Yes	No	No	0	0	0	0	0	1	1	2	1	1	1	1	2	1	4	2	4	2	4	2	2	1	3	3	2	0	0	0	0	0	0	0	0	4	5
Female	28	25-29 yr	unmarried	Master's degree or above	21,000-29,999	Govt	Tertiary	med	<37 hours	<3 years	No	Yes	No	No	0	3	0	2	0	2	3	1	5	3	3	3	1	2	2	3	1	7	1	2	1	1	7	2	3	2	0	0	2	2	0	0	0	3	2
Female	35.3	>29 yr	unmarried	Bachelor's degree	<21,000	Govt	Primary	gyn	>48 hours	>5 years	Yes	Yes	No	No	0	3	0	0	0	2	1	1	2	2	2	1	2	2	4	4	5	3	2	4	4	3	1	4	2	1	0	3	1	3	0	2	2	4	4
Female	34.4	>29 yr	married	Bachelor's degree	>29,999	Govt	Tertiary	med	<37 hours	>5 years	No	Yes	Yes	No	0	2	0	0	0	2	3	3	3	3	4	2	4	3	4	4	4	4	4	4	4	4	4	3	0	1	0	0	0	0	0	0	1	3	3
Female	25.3	25-29 yr	unmarried	Diploma degree	<21,000	Private	Secondary	general	37-48 hours	<3 years	No	No	No	No	0	3	2	0	0	2	2	5	2	4	2	5	3	2	6	5	6	1	5	6	5	5	7	4	3	3	3	2	1	1	1	1	1	2	2
Female	25	25-29 yr	unmarried	Diploma degree	>29,999	Private	Primary	general	<37 hours	3-5 years	Yes	Yes	Yes	Yes	0	0	0	0	0	1	1	1	1	1	1	1	1	1	3	1	1	1	2	1	1	1	1	1	3	0	0	1	3	1	0	1	0	5	5
Female	30	>29 yr	married	Diploma degree	>29,999	Govt	Tertiary	criti	37-48 hours	3-5 years	No	Yes	No	No	0	0	0	0	0	5	5	5	5	5	1	5	5	5	7	7	7	7	7	1	1	1	1	1	3	0	0	0	0	0	0	0	0	1	1
Female	26	25-29 yr	unmarried	Bachelor's degree	>29,999	Govt	Primary	gyn	>48 hours	3-5 years	Yes	Yes	No	No	0	2	1	0	0	2	2	2	2	2	5	2	2	2	4	5	5	3	5	4	3	4	3	6	3	1	0	1	0	3	0	1	0	3	3
Female	25	25-29 yr	married	Diploma degree	21,000-29,999	Govt	Secondary	med	<37 hours	3-5 years	No	Yes	No	No	0	0	1	0	0	1	2	5	2	2	2	2	2	2	6	5	5	5	5	5	5	5	4	4	0	3	3	3	3	3	3	3	3	2	2
Female	26.3	25-29 yr	married	Diploma degree	21,000-29,999	Govt	Tertiary	surg	<37 hours	3-5 years	No	Yes	No	No	0	1	0	0	0	3	1	2	1	1	1	1	1	2	5	4	3	1	1	3	4	1	6	1	3	1	2	0	0	0	3	0	0	4	5
Female	23	<25 yr	unmarried	Diploma degree	21,000-29,999	Private	Tertiary	med	<37 hours	<3 years	No	Yes	No	Yes	2	3	3	0	0	2	5	5	5	5	5	5	5	5	7	7	7	7	7	7	4	7	7	1	3	3	0	2	0	3	0	0	3	1	1
Female	24	<25 yr	unmarried	Bachelor's degree	<21,000	Private	Primary	surg	<37 hours	<3 years	Yes	Yes	No	No	0	0	0	0	0	2	1	2	1	1	2	1	1	1	5	4	5	1	5	4	4	5	4	4	3	1	1	1	2	2	0	0	0	3	3
Female	26.5	25-29 yr	unmarried	Master's degree or above	<21,000	Private	Tertiary	med	<37 hours	<3 years	No	Yes	No	No	0	3	1	0	0	1	1	2	1	2	5	2	1	1	5	6	7	1	7	7	4	5	7	7	1	3	3	1	2	3	2	1	2	3	2
Female	32	>29 yr	married	Diploma degree	>29,999	Govt	Tertiary	surg	<37 hours	>5 years	No	Yes	No	No	1	1	3	1	1	3	4	2	3	3	5	3	4	2	5	6	5	5	6	6	2	5	6	4	2	2	1	2	1	2	1	1	1	3	2
Female	23.2	<25 yr	unmarried	Diploma degree	<21,000	Private	Tertiary	general	<37 hours	<3 years	Yes	Yes	No	Yes	0	3	0	0	0	1	1	1	1	1	3	2	2	1	5	4	4	5	5	5	3	5	5	1	3	2	3	1	1	1	2	0	1	2	5
Female	24.4	<25 yr	married	Bachelor's degree	<21,000	Private	Tertiary	criti	<37 hours	<3 years	Yes	Yes	No	Yes	0	0	0	0	0	1	1	1	1	1	2	2	1	1	1	1	1	1	1	2	1	2	4	4	3	0	0	0	1	1	0	0	0	3	3
Female	25.3	25-29 yr	unmarried	Diploma degree	21,000-29,999	Govt	Secondary	criti	<37 hours	>5 years	No	Yes	No	No	0	0	1	0	0	1	1	1	1	1	1	2	1	1	4	3	4	1	2	4	3	1	4	1	3	0	0	0	0	0	0	0	0	4	5
Female	35.2	>29 yr	married	Bachelor's degree	>29,999	Govt	Secondary	med	<37 hours	>5 years	Yes	Yes	No	No	3	3	1	0	0	2	2	3	2	3	1	2	2	2	2	2	1	1	3	2	1	2	2	1	3	0	1	1	1	1	0	0	0	5	5
Female	24.3	<25 yr	unmarried	Diploma degree	<21,000	Govt	Secondary	general	37-48 hours	<3 years	Yes	Yes	No	No	0	0	0	0	0	1	1	2	1	2	1	2	2	1	4	5	5	1	3	4	1	1	4	1	3	1	1	0	0	0	0	0	0	4	4
Female	27	25-29 yr	unmarried	Master's degree or above	21,000-29,999	Govt	Tertiary	med	<37 hours	3-5 years	No	Yes	No	No	0	2	0	2	2	2	3	1	5	2	3	3	1	2	1	3	1	7	1	2	1	1	7	2	3	2	0	0	2	2	0	0	0	3	2
Female	24.7	<25 yr	unmarried	Diploma degree	21,000-29,999	Govt	Tertiary	gyn	<37 hours	3-5 years	No	Yes	No	No	0	2	1	0	0	2	2	2	2	2	2	2	2	2	2	2	2	1	2	3	2	1	1	2	1	1	0	0	0	1	0	0	1	4	4
Female	25.3	25-29 yr	married	Diploma degree	21,000-29,999	Govt	Tertiary	general	<37 hours	3-5 years	Yes	Yes	No	Yes	0	0	1	0	0	2	2	2	1	1	2	2	1	2	7	4	1	1	2	4	4	2	4	3	1	1	1	2	1	3	1	1	0	4	4
Female	27.5	25-29 yr	unmarried	Master's degree or above	21,000-29,999	Govt	Primary	general	37-48 hours	3-5 years	No	Yes	No	No	0	3	2	2	0	5	5	1	2	5	2	2	5	1	5	7	6	7	7	5	1	4	5	6	2	3	3	2	1	1	3	0	1	3	2
Female	28	25-29 yr	married	Master's degree or above	>29,999	Govt	Primary	med	<37 hours	3-5 years	No	Yes	No	No	0	0	0	0	0	2	2	2	1	1	2	2	2	2	4	4	4	3	4	4	4	4	6	1	3	0	0	0	0	0	0	0	0	5	5
Female	28	25-29 yr	unmarried	Diploma degree	>29,999	Govt	Secondary	general	<37 hours	3-5 years	No	No	No	No	0	2	0	0	0	1	1	2	2	1	2	1	2	1	4	3	4	1	4	3	4	4	3	1	3	0	0	1	2	0	1	0	0	4	4
Female	38.2	>29 yr	married	Bachelor's degree	>29,999	Govt	Tertiary	criti	<37 hours	>5 years	No	Yes	Yes	No	0	2	0	0	0	2	2	1	2	2	2	2	3	2	2	2	2	1	2	2	2	1	1	2	1	1	0	0	0	1	1	0	1	4	4
Female	22.8	<25 yr	unmarried	Diploma degree	<21,000	Private	Primary	gyn	>48 hours	<3 years	Yes	No	No	No	0	0	0	0	0	2	2	2	2	3	2	2	2	1	3	3	2	3	4	2	4	3	3	3	3	2	2	1	1	1	1	1	0	3	3
Female	29.4	25-29 yr	unmarried	Diploma degree	21,000-29,999	Govt	Tertiary	criti	>48 hours	3-5 years	Yes	Yes	No	No	0	3	3	0	0	3	2	3	3	2	2	1	2	1	3	2	3	3	2	3	2	1	5	3	2	3	3	1	3	3	0	0	1	3	4
Female	40	>29 yr	married	Master's degree or above	>29,999	Govt	Tertiary	criti	37-48 hours	>5 years	Yes	Yes	No	No	0	3	0	0	0	2	2	2	2	2	2	2	2	2	1	1	1	1	7	7	1	1	7	1	3	0	0	0	0	3	0	0	0	5	5
Female	25	25-29 yr	unmarried	Diploma degree	21,000-29,999	Private	Secondary	criti	37-48 hours	3-5 years	No	Yes	No	No	0	3	2	0	0	2	2	5	5	2	5	5	5	2	7	4	7	1	4	4	2	1	7	1	3	1	1	0	1	1	0	0	0	3	3
Female	30	>29 yr	married	Bachelor's degree	21,000-29,999	Private	Tertiary	surg	37-48 hours	3-5 years	Yes	Yes	No	No	0	0	0	0	0	1	1	1	1	2	1	1	1	1	3	3	2	1	1	3	3	1	4	1	3	0	3	1	0	0	3	0	0	4	5
Female	32.4	>29 yr	married	Bachelor's degree	>29,999	Govt	Tertiary	criti	<37 hours	>5 years	No	Yes	No	No	0	2	0	0	0	2	2	4	4	4	4	4	5	4	5	4	5	4	5	5	5	5	5	4	1	1	2	2	1	1	1	1	2	3	3
Female	33.7	>29 yr	married	Diploma degree	21,000-29,999	Govt	Tertiary	gyn	<37 hours	>5 years	No	Yes	No	No	1	2	1	0	0	2	1	1	1	1	1	1	1	1	2	2	1	1	1	2	1	1	2	1	2	0	1	0	1	0	0	0	0	4	4
Female	32.9	>29 yr	married	Diploma degree	>29,999	Govt	Secondary	med	37-48 hours	3-5 years	Yes	Yes	No	No	0	0	0	0	0	1	1	1	1	1	1	1	1	1	1	1	1	1	1	1	1	1	1	1	3	0	0	0	0	0	0	0	0	5	5
Female	23.5	<25 yr	unmarried	Diploma degree	<21,000	Private	Secondary	gyn	<37 hours	<3 years	Yes	Yes	No	No	0	0	1	0	0	1	1	1	1	1	1	1	1	1	1	1	2	1	1	2	1	1	2	1	3	0	0	1	0	0	0	0	0	3	5
Female	30	>29 yr	unmarried	Master's degree or above	21,000-29,999	Govt	Primary	criti	37-48 hours	<3 years	No	Yes	Yes	No	0	0	0	0	0	1	2	2	1	1	1	2	2	1	2	1	1	1	1	1	2	1	1	1	3	0	0	0	0	0	0	0	0	3	3
Female	27	25-29 yr	married	Bachelor's degree	>29,999	Govt	Tertiary	surg	<37 hours	3-5 years	No	Yes	No	No	0	0	0	0	0	1	1	1	1	1	1	2	1	1	3	4	1	6	1	1	1	1	1	1	1	1	0	0	0	0	0	0	0	4	2
Female	25.3	25-29 yr	unmarried	Diploma degree	<21,000	Private	Tertiary	general	37-48 hours	<3 years	No	No	No	Yes	3	3	2	0	0	2	2	2	1	5	2	2	2	2	7	7	5	2	4	4	3	5	4	6	3	3	3	2	3	3	3	2	1	1	5
Female	28	25-29 yr	married	Bachelor's degree	21,000-29,999	Govt	Tertiary	med	<37 hours	3-5 years	No	Yes	No	No	0	0	0	0	0	2	2	1	4	2	3	2	2	2	6	4	5	3	7	7	6	4	5	4	3	2	3	3	3	3	3	3	0	3	3
Female	28.3	25-29 yr	married	Master's degree or above	21,000-29,999	Govt	Secondary	med	<37 hours	3-5 years	No	Yes	No	No	0	3	3	0	0	2	1	2	1	2	2	3	2	2	6	4	4	3	4	4	4	3	4	4	2	1	1	2	2	1	1	2	0	4	3
Female	24.5	<25 yr	married	Bachelor's degree	<21,000	Private	Tertiary	med	<37 hours	3-5 years	Yes	Yes	No	No	0	0	0	0	0	1	1	1	1	1	1	1	1	1	1	1	1	1	1	1	2	1	1	1	3	0	0	0	0	0	0	0	0	5	5
Female	28.6	25-29 yr	married	Bachelor's degree	21,000-29,999	Govt	Tertiary	criti	37-48 hours	>5 years	Yes	Yes	No	No	0	1	1	2	1	2	2	2	1	2	2	2	3	1	5	4	4	2	5	5	4	4	3	4	1	2	1	1	1	2	2	1	0	3	3
Female	33	>29 yr	married	Bachelor's degree	21,000-29,999	Govt	Tertiary	general	<37 hours	>5 years	No	No	No	No	0	3	3	1	0	4	3	5	5	5	5	5	5	5	3	7	7	3	7	7	3	7	5	5	3	3	1	1	3	3	1	0	0	1	5
Female	25.4	25-29 yr	married	Master's degree or above	21,000-29,999	Govt	Tertiary	general	37-48 hours	<3 years	No	Yes	No	No	0	3	3	0	0	2	2	2	5	4	4	4	2	5	5	7	7	4	4	5	4	6	5	4	1	3	1	1	1	2	3	2	0	3	3
Female	35	>29 yr	unmarried	Bachelor's degree	>29,999	Govt	Tertiary	criti	<37 hours	>5 years	No	Yes	No	No	0	3	0	0	0	2	1	2	1	2	2	2	1	1	3	4	5	1	4	4	1	1	1	1	3	0	0	0	0	0	0	0	0	4	4
Female	30.3	>29 yr	unmarried	Diploma degree	21,000-29,999	Govt	Tertiary	med	<37 hours	>5 years	No	Yes	No	No	0	2	2	1	0	3	4	4	4	4	4	2	4	3	5	5	5	5	3	6	6	5	6	4	1	2	2	2	2	1	1	2	2	4	3
Female	23	<25 yr	unmarried	Diploma degree	21,000-29,999	Private	Tertiary	med	>48 hours	<3 years	Yes	Yes	No	No	0	0	0	0	0	1	1	1	1	1	5	1	2	1	7	1	7	1	1	2	1	1	7	1	3	1	0	1	0	0	0	0	0	4	4
Female	24	<25 yr	unmarried	Bachelor's degree	21,000-29,999	Govt	Tertiary	med	37-48 hours	<3 years	No	Yes	No	No	2	3	0	1	0	2	2	2	1	5	5	4	2	3	5	7	7	5	7	6	4	4	6	7	1	2	1	2	2	1	3	2	1	4	3
Female	29.5	25-29 yr	married	Bachelor's degree	21,000-29,999	Govt	Secondary	med	<37 hours	3-5 years	No	Yes	No	No	0	2	3	0	0	1	2	2	2	1	2	1	2	2	4	3	3	1	1	1	4	2	5	2	1	1	3	1	1	0	1	0	0	5	5
Female	26.7	25-29 yr	married	Master's degree or above	21,000-29,999	Govt	Tertiary	gyn	<37 hours	3-5 years	No	Yes	No	No	0	3	3	1	0	2	2	2	2	2	2	2	2	2	2	5	5	5	7	7	5	5	5	5	1	1	1	1	1	1	1	1	1	4	4
Female	25.7	25-29 yr	unmarried	Bachelor's degree	21,000-29,999	Govt	Tertiary	med	<37 hours	<3 years	No	Yes	No	No	0	0	0	0	0	1	1	2	2	2	2	1	1	1	5	4	3	1	3	4	5	1	4	1	1	1	2	3	0	0	0	2	0	3	4
Female	31	>29 yr	married	Master's degree or above	>29,999	Govt	Tertiary	criti	37-48 hours	>5 years	Yes	Yes	No	No	0	1	0	1	0	1	4	1	4	2	1	2	3	2	1	1	2	1	1	1	4	1	2	2	2	2	0	0	2	1	1	0	1	4	4
Female	22.4	<25 yr	unmarried	Bachelor's degree	<21,000	Govt	Tertiary	med	<37 hours	<3 years	No	Yes	Yes	Yes	0	0	0	0	0	1	1	1	1	1	1	2	1	1	3	3	3	1	3	1	3	1	4	3	3	0	0	0	3	0	0	0	0	4	4
Female	32	>29 yr	married	Bachelor's degree	>29,999	Govt	Tertiary	surg	37-48 hours	>5 years	No	Yes	No	No	0	0	0	0	0	2	2	1	1	2	4	5	3	3	5	5	5	5	5	5	5	5	5	3	1	2	2	2	2	1	1	2	2	2	2
Female	23	<25 yr	unmarried	Bachelor's degree	<21,000	Private	Tertiary	med	<37 hours	<3 years	Yes	No	No	No	0	0	0	0	0	1	1	1	1	1	2	1	2	1	7	1	2	1	1	1	6	1	6	3	1	0	0	2	1	0	0	0	0	3	3
Female	29	25-29 yr	married	Bachelor's degree	21,000-29,999	Govt	Primary	med	<37 hours	3-5 years	No	Yes	No	No	0	3	3	2	0	2	2	2	2	3	2	3	2	2	5	4	5	4	4	5	4	3	6	4	3	3	3	3	3	2	0	0	2	4	4
Female	24.7	<25 yr	unmarried	Diploma degree	>29,999	Private	Tertiary	criti	37-48 hours	<3 years	Yes	Yes	Yes	Yes	0	0	0	0	0	1	1	1	1	1	1	1	1	1	4	3	4	1	3	4	3	1	7	1	3	0	3	1	1	0	3	0	0	5	5
Female	24	<25 yr	married	Bachelor's degree	21,000-29,999	Govt	Tertiary	med	37-48 hours	<3 years	No	Yes	No	No	0	2	0	0	0	4	2	2	2	2	4	2	4	3	5	4	4	4	5	4	4	3	5	3	2	1	1	3	0	0	0	0	0	4	4
Female	26.8	25-29 yr	married	Diploma degree	21,000-29,999	Govt	Tertiary	surg	<37 hours	<3 years	Yes	Yes	No	No	0	0	0	1	0	1	1	1	1	2	2	2	2	2	5	4	4	4	4	4	5	1	4	1	3	0	2	1	1	1	1	1	0	4	4
Female	25.3	25-29 yr	unmarried	Master's degree or above	21,000-29,999	Govt	Tertiary	med	<37 hours	<3 years	No	Yes	Yes	No	0	3	3	3	0	5	5	5	2	2	2	2	2	2	5	4	4	2	4	5	4	4	4	4	1	2	0	0	0	0	0	0	0	2	2
Female	24.8	<25 yr	unmarried	Bachelor's degree	<21,000	Private	Tertiary	med	37-48 hours	<3 years	Yes	Yes	No	No	0	0	0	0	0	1	1	2	1	1	1	2	1	1	5	4	3	1	4	4	4	2	4	3	2	1	0	1	0	2	0	0	1	2	2
Female	29	25-29 yr	married	Master's degree or above	21,000-29,999	Govt	Primary	gyn	<37 hours	3-5 years	No	Yes	No	No	0	2	3	0	0	2	2	3	2	2	2	2	2	4	4	4	5	3	4	4	3	3	6	5	1	1	2	1	1	1	2	0	0	3	3
Female	26	25-29 yr	married	Diploma degree	21,000-29,999	Govt	Tertiary	criti	>48 hours	3-5 years	No	Yes	No	No	0	3	1	0	0	2	2	2	2	2	3	2	3	3	3	3	4	4	4	5	3	4	2	4	3	1	1	0	0	3	0	1	0	5	5
Female	28	25-29 yr	married	Bachelor's degree	21,000-29,999	Govt	Secondary	criti	<37 hours	3-5 years	No	No	No	No	0	1	2	0	0	2	2	2	2	5	2	3	3	5	4	5	5	5	6	6	5	6	3	5	1	3	3	3	3	3	3	0	0	3	3
Female	41	>29 yr	married	Master's degree or above	>29,999	Govt	Tertiary	med	<37 hours	>5 years	Yes	Yes	No	No	0	3	0	0	0	1	1	1	1	1	1	1	1	1	7	7	3	1	1	1	7	1	1	1	3	0	0	0	0	0	0	3	0	3	5
Female	28	25-29 yr	unmarried	Master's degree or above	<21,000	Govt	Tertiary	med	37-48 hours	3-5 years	No	Yes	Yes	No	0	0	0	0	0	1	1	2	2	1	2	1	2	2	2	4	3	1	2	3	4	4	3	4	3	0	0	1	1	3	0	0	0	5	5
Female	29	25-29 yr	unmarried	Diploma degree	>29,999	Govt	Tertiary	med	37-48 hours	>5 years	Yes	Yes	No	No	0	0	0	0	0	2	3	1	1	1	1	5	1	1	3	1	2	1	1	2	2	1	3	1	3	1	1	1	0	2	0	1	0	3	3
Female	35	>29 yr	married	Diploma degree	>29,999	Govt	Tertiary	surg	<37 hours	>5 years	No	Yes	No	No	0	0	0	0	0	2	2	2	2	2	2	2	2	2	7	2	4	1	3	4	3	2	3	3	3	3	3	2	2	2	1	0	0	5	1
Female	22.4	<25 yr	unmarried	Diploma degree	<21,000	Private	Secondary	general	37-48 hours	<3 years	Yes	Yes	No	No	0	1	0	0	0	1	1	1	1	1	1	1	1	1	4	3	4	1	3	3	4	3	4	1	3	1	2	1	1	1	1	0	0	4	4
Female	24.7	<25 yr	unmarried	Diploma degree	>29,999	Private	Tertiary	criti	37-48 hours	>5 years	Yes	Yes	Yes	Yes	0	0	0	0	0	1	1	1	1	3	1	1	1	1	4	3	4	1	4	4	3	3	5	1	3	0	1	1	0	0	3	0	0	5	5
Female	26	25-29 yr	unmarried	Bachelor's degree	21,000-29,999	Private	Tertiary	criti	37-48 hours	3-5 years	Yes	Yes	No	No	0	1	0	0	0	2	2	2	2	2	2	2	2	2	4	4	4	1	1	4	1	1	5	4	2	2	0	0	1	1	0	1	1	3	3
Female	31	>29 yr	unmarried	Bachelor's degree	>29,999	Govt	Tertiary	general	>48 hours	>5 years	No	Yes	No	Yes	0	0	0	0	0	2	1	1	1	1	1	1	2	2	4	5	4	1	5	3	2	1	2	4	1	1	3	3	0	0	3	0	0	4	4
Female	26	25-29 yr	unmarried	Diploma degree	21,000-29,999	Govt	Tertiary	criti	37-48 hours	3-5 years	No	Yes	No	No	0	1	2	0	0	2	2	1	3	1	3	1	3	2	2	2	3	3	3	3	3	3	5	5	0	0	1	1	0	0	1	0	1	3	3
Female	25	25-29 yr	unmarried	Bachelor's degree	>29,999	Private	Primary	general	37-48 hours	3-5 years	Yes	Yes	Yes	Yes	0	0	0	0	0	2	2	1	2	2	2	1	2	2	2	3	1	1	1	3	3	1	4	1	3	0	0	0	0	0	0	0	0	4	5
Female	24	<25 yr	unmarried	Bachelor's degree	<21,000	Private	Secondary	general	>48 hours	<3 years	No	Yes	No	No	0	3	0	0	0	4	2	1	2	2	2	2	2	2	4	5	4	1	3	4	3	3	3	1	3	3	1	1	1	3	0	0	3	1	5
Female	27	25-29 yr	unmarried	Bachelor's degree	21,000-29,999	Govt	Tertiary	med	37-48 hours	3-5 years	Yes	Yes	No	No	0	1	0	0	0	1	1	1	1	1	1	1	1	1	1	1	1	1	1	1	1	1	1	1	0	0	1	0	0	0	0	0	0	5	5
Female	54	>29 yr	married	Master's degree or above	>29,999	Govt	Tertiary	criti	<37 hours	>5 years	Yes	Yes	Yes	No	0	0	0	0	0	2	1	2	3	2	2	1	1	2	6	7	7	6	1	3	2	6	4	2	0	1	2	2	2	1	1	1	1	5	4
Female	26.8	25-29 yr	married	Diploma degree	21,000-29,999	Govt	Tertiary	criti	<37 hours	>5 years	No	Yes	No	No	0	3	1	0	0	2	2	2	2	2	2	2	2	1	4	4	2	1	3	3	4	2	5	2	2	1	1	1	1	1	0	1	1	4	4
Female	30	>29 yr	unmarried	Diploma degree	21,000-29,999	Govt	Tertiary	criti	37-48 hours	>5 years	No	Yes	No	No	1	3	2	3	0	2	2	2	2	2	2	2	2	2	4	4	4	3	4	4	3	3	4	3	2	1	1	1	0	0	0	0	0	4	4
Female	23.5	<25 yr	unmarried	Diploma degree	<21,000	Private	Secondary	med	37-48 hours	<3 years	Yes	Yes	No	Yes	0	0	1	0	0	1	1	1	1	1	2	1	1	2	4	3	1	3	1	1	5	2	4	1	3	0	3	1	1	1	0	2	0	4	5
Female	30	>29 yr	unmarried	Bachelor's degree	21,000-29,999	Govt	Tertiary	gyn	>48 hours	3-5 years	No	No	No	No	1	3	3	0	0	2	5	5	5	2	2	2	5	5	4	7	4	4	4	7	3	7	3	4	1	3	3	3	2	3	0	0	3	3	3
Female	30.5	>29 yr	married	Bachelor's degree	21,000-29,999	Govt	Primary	med	37-48 hours	<3 years	No	No	No	No	0	2	3	0	0	1	1	2	1	5	1	2	2	1	4	3	5	5	4	4	3	1	2	2	3	3	1	0	0	0	0	0	0	4	5
Female	23	<25 yr	unmarried	Diploma degree	<21,000	Private	Tertiary	criti	37-48 hours	<3 years	Yes	Yes	No	Yes	0	0	0	0	0	2	1	1	2	2	2	2	2	2	3	4	4	4	4	5	4	4	5	3	2	1	1	1	2	0	0	0	0	3	5
Female	28	25-29 yr	married	Master's degree or above	21,000-29,999	Govt	Tertiary	criti	<37 hours	3-5 years	No	Yes	No	No	0	0	0	1	0	1	2	5	5	5	5	5	5	5	7	6	5	1	6	6	3	3	3	4	2	1	1	2	2	1	3	2	1	3	3
Female	23	<25 yr	unmarried	Diploma degree	>29,999	Private	Tertiary	criti	>48 hours	<3 years	No	No	No	No	1	2	0	0	0	2	2	2	2	2	5	2	5	2	4	5	5	1	4	6	4	4	4	1	3	3	2	3	2	1	3	0	3	4	4
Female	42	>29 yr	married	Master's degree or above	>29,999	Govt	Tertiary	general	<37 hours	>5 years	No	Yes	No	No	0	0	0	0	0	3	3	3	3	4	4	1	1	2	6	6	6	1	2	3	2	2	3	2	1	2	2	3	3	1	1	2	0	4	3
Female	29	25-29 yr	unmarried	Diploma degree	21,000-29,999	Govt	Tertiary	general	37-48 hours	>5 years	Yes	Yes	Yes	No	0	2	2	2	3	2	5	2	2	5	5	2	5	2	7	4	5	3	7	7	4	6	7	3	3	0	0	0	0	0	2	0	0	5	5
Female	23.4	<25 yr	unmarried	Bachelor's degree	21,000-29,999	Govt	Tertiary	surg	<37 hours	<3 years	Yes	Yes	No	Yes	0	0	0	0	0	1	1	1	1	1	1	1	1	1	4	2	2	2	3	4	2	2	4	2	3	1	0	1	0	1	0	1	0	4	4
Female	24.8	<25 yr	unmarried	Bachelor's degree	<21,000	Private	Tertiary	surg	<37 hours	3-5 years	No	No	No	Yes	0	3	3	0	0	1	2	1	3	2	1	1	1	3	5	4	7	1	1	4	3	2	3	3	1	2	1	1	0	1	1	0	0	2	2
Female	27.8	25-29 yr	married	Diploma degree	>29,999	Govt	Tertiary	med	37-48 hours	>5 years	No	Yes	No	No	0	0	0	0	0	1	1	1	1	1	1	1	1	1	5	1	2	1	2	1	1	1	1	1	3	1	0	0	3	0	3	1	0	5	5
Female	35	>29 yr	married	Master's degree or above	>29,999	Govt	Tertiary	med	<37 hours	>5 years	Yes	Yes	Yes	No	0	0	0	0	0	2	1	1	1	1	1	1	1	1	1	1	1	1	1	1	1	1	1	1	0	0	0	0	0	0	0	0	0	5	5
Female	30	>29 yr	married	Bachelor's degree	>29,999	Govt	Tertiary	gyn	37-48 hours	>5 years	Yes	Yes	No	No	0	3	0	0	0	2	2	2	2	2	1	2	2	2	1	1	1	7	7	1	1	1	7	1	3	0	0	0	0	3	0	0	0	5	5
Female	26.8	25-29 yr	married	Diploma degree	21,000-29,999	Govt	Tertiary	med	<37 hours	3-5 years	No	Yes	No	No	0	3	1	0	0	5	4	3	4	4	5	1	4	3	6	7	7	1	5	6	1	2	2	3	2	2	1	2	0	1	1	2	1	4	3
Female	25	25-29 yr	unmarried	Bachelor's degree	<21,000	Private	Secondary	gyn	<37 hours	<3 years	Yes	Yes	No	No	0	3	1	0	0	2	2	2	2	2	2	2	2	2	6	6	6	4	3	5	5	4	3	5	1	3	2	2	1	2	0	2	1	1	2
Female	24.4	<25 yr	married	Bachelor's degree	21,000-29,999	Govt	Tertiary	med	37-48 hours	<3 years	Yes	Yes	No	No	0	3	0	0	0	2	2	2	2	4	2	1	2	1	1	7	7	1	7	7	1	1	1	1	3	0	2	1	0	0	0	0	0	3	3
Female	38	>29 yr	married	Master's degree or above	21,000-29,999	Govt	Tertiary	general	37-48 hours	>5 years	Yes	Yes	Yes	Yes	0	0	0	0	0	1	1	1	1	1	1	1	1	1	3	3	1	1	1	1	1	1	1	1	3	0	0	0	0	0	0	0	0	5	4
Female	29.2	25-29 yr	married	Bachelor's degree	21,000-29,999	Private	Secondary	gyn	<37 hours	3-5 years	Yes	Yes	No	No	0	0	0	0	0	2	2	1	1	2	2	2	1	1	4	1	4	1	4	4	4	1	6	4	3	1	1	1	3	1	0	0	1	3	3
Female	49	>29 yr	married	Diploma degree	>29,999	Govt	Tertiary	surg	<37 hours	>5 years	Yes	Yes	No	No	1	1	1	0	0	2	2	2	3	3	2	2	2	3	5	3	2	1	2	3	3	4	3	5	2	2	2	2	2	0	0	0	0	4	3
Female	29	25-29 yr	married	Diploma degree	>29,999	Govt	Secondary	med	37-48 hours	>5 years	Yes	Yes	No	No	0	3	1	0	1	2	1	1	1	2	2	2	1	2	7	6	7	6	5	5	4	3	3	2	3	1	1	3	0	1	1	1	1	5	5
Female	33	>29 yr	married	Bachelor's degree	>29,999	Govt	Tertiary	surg	37-48 hours	>5 years	No	Yes	No	No	2	1	1	0	0	5	3	3	2	4	3	3	5	2	5	5	6	3	5	4	4	4	5	6	0	2	1	3	1	1	1	1	1	3	3
Female	22.2	<25 yr	unmarried	Diploma degree	21,000-29,999	Private	Secondary	em	<37 hours	<3 years	Yes	Yes	No	Yes	0	0	0	3	0	5	5	2	4	2	4	2	5	5	4	3	1	1	4	1	1	1	7	4	3	0	0	0	0	1	0	0	0	3	3
Female	26.9	25-29 yr	married	Bachelor's degree	21,000-29,999	Govt	Tertiary	surg	<37 hours	>5 years	No	Yes	No	No	0	3	1	0	0	2	3	5	3	3	5	2	4	2	5	5	5	1	3	3	1	2	3	3	1	1	2	0	0	0	0	2	0	3	3
Female	38.8	>29 yr	married	Bachelor's degree	>29,999	Govt	Primary	med	37-48 hours	>5 years	No	Yes	No	No	0	3	0	0	0	2	2	3	2	2	3	2	2	1	4	4	2	1	1	2	3	1	4	2	3	1	0	0	0	1	0	0	0	1	1
Female	42	>29 yr	married	Master's degree or above	>29,999	Govt	Tertiary	general	37-48 hours	>5 years	Yes	Yes	Yes	Yes	1	0	0	0	0	3	2	1	3	3	3	1	1	2	5	5	3	3	4	1	2	3	4	2	2	1	1	2	2	1	1	1	1	3	2
Female	26.2	25-29 yr	unmarried	Bachelor's degree	<21,000	Private	Primary	gyn	>48 hours	3-5 years	Yes	Yes	No	No	0	0	0	0	0	1	1	1	1	1	2	1	2	1	2	1	1	1	1	3	3	3	4	1	3	0	0	1	0	0	0	0	0	3	3
Female	27	25-29 yr	unmarried	Master's degree or above	>29,999	Govt	Secondary	med	<37 hours	3-5 years	No	Yes	No	No	0	3	3	0	0	2	2	2	1	1	2	2	2	1	4	4	4	3	3	4	3	3	5	4	3	1	3	1	0	1	2	0	1	2	4
Female	27	25-29 yr	unmarried	Diploma degree	21,000-29,999	Govt	Tertiary	em	37-48 hours	3-5 years	Yes	Yes	No	No	1	0	0	0	0	2	2	2	2	2	2				6	4	2	3	3	4	4	4	4	3	2	1	2	0	0	0	0	0	1	5	4
Female	29.2	25-29 yr	married	Diploma degree	>29,999	Govt	Tertiary	med	<37 hours	>5 years	No	Yes	No	No	1	2	1	2	0	2	3	2	3	2	4	2	4	2	6	5	5	5	5	5	2	3	5	3	2	2	1	1	1	1	1	1	1	4	3
Female	30	>29 yr	unmarried	Master's degree or above	21,000-29,999	Govt	Secondary	med	<37 hours	3-5 years	Yes	Yes	No	No	0	3	3	0	0	2	2	2	1	1	2	2	2	2	6	6	7	4	4	5	4	4	4	3	3	3	2	2	2	3	2	1	1	4	4
Female	28	25-29 yr	married	Diploma degree	21,000-29,999	Govt	Tertiary	med	37-48 hours	<3 years	No	Yes	No	No	0	0	0	1	0	2	1	2	1	1	1	2	2	1	2	1	1	1	1	2	2	2	1	1	1	1	1	1	1	0	1	0	0	4	4
Female	29	25-29 yr	married	Bachelor's degree	>29,999	Govt	Tertiary	med	<37 hours	3-5 years	Yes	Yes	No	No	0	3	2	3	2	2	2	3	2	2	2	2	2	2	4	4	4	1	4	4	5	4	1	2	1	1	0	0	0	0	1	0	0	3	3
Female	30	>29 yr	married	Diploma degree	21,000-29,999	Govt	Tertiary	criti	<37 hours	>5 years	Yes	Yes	No	No	0	1	1	0	0	2	2	2	2	2	2	2	2	2	1	1	1	1	1	1	2	1	4	1	3	0	2	2	0	0	3	0	0	4	5
Female	24	<25 yr	unmarried	Bachelor's degree	<21,000	Private	Secondary	surg	37-48 hours	<3 years	Yes	Yes	Yes	No	0	0	0	0	0	1	1	1	1	1	1	1	2	1	4	3	1	1	3	4	3	1	1	1	3	1	0	0	0	0	0	0	0	4	4
Female	32	>29 yr	married	Bachelor's degree	21,000-29,999	Private	Secondary	criti	37-48 hours	>5 years	Yes	Yes	No	No	0	0	1	0	0	1	1	1	1	1	1	1	1	1	2	1	1	4	1	3	3	1	5	1	3	0	0	0	3	2	3	2	0	1	1
Female	30	>29 yr	married	Diploma degree	>29,999	Govt	Tertiary	em	37-48 hours	>5 years	No	Yes	No	No	1	0	1	0	0	2	1	2	1	3	2	2	2	2	5	6	2	3	3	3	3	4	3	3	3	2	1	0	1	1	1	1	1	3	4
Female	32.6	>29 yr	married	Bachelor's degree	>29,999	Govt	Tertiary	gyn	<37 hours	>5 years	No	Yes	Yes	No	1	2	1	0	0	2	2	2	2	2	2	2	2	2	1	1	1	1	1	1	1	1	1	1	2	0	0	0	0	0	0	0	0	3	4
Female	32	>29 yr	married	Diploma degree	21,000-29,999	Govt	Secondary	med	37-48 hours	3-5 years	No	Yes	No	Yes	0	3	3	0	0	1	1	1	2	5	2	2	1	1	4	1	1	1	4	3	4	3	7	1	2	0	0	1	0	0	0	0	0	4	4
Female	57.2	>29 yr	married	Bachelor's degree	>29,999	Govt	Tertiary	surg	<37 hours	>5 years	No	Yes	Yes	No	0	2	2	0	0	2	2	2	2	1	4	1	4	2	3	3	4	4	3	3	3	3	5	3	2	1	1	1	1	1	0	0	0	4	4
Female	24.3	<25 yr	unmarried	Bachelor's degree	>29,999	Private	Primary	med	<37 hours	<3 years	Yes	No	No	Yes	2	2	1	0	0	2	5	2	5	2	2	1	2	5	5	3	2	3	5	6	4	1	5	4	3	1	2	1	1	3	3	1	2	3	5
Female	23	<25 yr	unmarried	Bachelor's degree	21,000-29,999	Govt	Tertiary	criti	37-48 hours	<3 years	No	Yes	Yes	Yes	0	0	3	0	0	1	1	1	1	1	1	1	1	1	3	4	1	1	3	4	2	1	4	1	3	0	0	0	0	0	0	0	0	4	3
Female	23	<25 yr	unmarried	Diploma degree	<21,000	Private	Secondary	med	37-48 hours	<3 years	Yes	Yes	No	No	0	0	0	0	0	1	1	1	1	1	1	1	1	1	2	1	1	1	1	1	2	1	2	1	3	1	1	1	3	0	3	2	0	5	5
Female	25	25-29 yr	unmarried	Diploma degree	<21,000	Private	Primary	general	>48 hours	<3 years	Yes	Yes	No	Yes	0	0	0	0	0	1	1	1	1	2	2	1	1	1	4	4	1	1	4	4	3	4	5	7	2	1	1	2	0	0	0	0	0	3	3
Female	23	<25 yr	unmarried	Bachelor's degree	<21,000	Private	Tertiary	criti	<37 hours	<3 years	Yes	Yes	No	No	0	3	0	0	0	2	2	1	3	4	5	1	2	1	5	3	7	1	4	7	3	1	4	4	3	1	1	2	0	1	1	1	0	4	2
Female	26	25-29 yr	married	Diploma degree	<21,000	Private	Tertiary	med	37-48 hours	3-5 years	Yes	Yes	No	No	0	3	0	0	0	3	3	2	3	5	4	2	3	2	5	4	5	5	5	5	5	5	5	5	2	0	0	1	0	0	0	0	0	3	5
Female	26	25-29 yr	married	Master's degree or above	>29,999	Govt	Tertiary	surg	<37 hours	3-5 years	No	Yes	No	No	0	3	3	3	0	1	5	5	5	5	5	5	5	5	5	4	4	1	5	3	5	3	3	7	2	0	2	0	1	0	1	2	0	5	1
Female	24.8	<25 yr	unmarried	Diploma degree	<21,000	Govt	Tertiary	criti	<37 hours	3-5 years	No	Yes	No	No	0	1	0	1	1	2	2	2	2	1	2	2	1	2	4	4	2	3	1	3	3	2	7	4	3	0	0	0	0	0	0	0	0	4	5
Female	43.4	>29 yr	married	Diploma degree	>29,999	Govt	Tertiary	surg	<37 hours	>5 years	Yes	Yes	Yes	No	1	1	1	0	0	2	2	1	2	2	2	2	2	1	7	3	3	1	2	4	3	2	3	2	0	1	1	1	0	0	0	0	1	5	3
Female	29.8	25-29 yr	married	Diploma degree	21,000-29,999	Govt	Tertiary	surg	<37 hours	>5 years	No	Yes	Yes	No	1	1	1	0	0	2	2	2	2	2	2	2	2	2	1	2	2	2	1	2	1	1	1	1	3	1	0	0	0	0	0	0	0	4	4
Female	23.2	<25 yr	unmarried	Diploma degree	<21,000	Private	Tertiary	criti	>48 hours	<3 years	Yes	Yes	No	No	0	1	0	0	0	1	2	2	1	2	1	1	1	1	3	3	4	1	4	3	3	1	7	1	2	1	0	1	0	1	0	0	0	4	3
Female	33	>29 yr	married	Diploma degree	>29,999	Govt	Tertiary	general	37-48 hours	>5 years	Yes	Yes	No	No	0	1	0	2	0	1	2	1	1	2	2	5	1	1	3	1	2	2	1	3	2	1	3	1	3	0	0	1	0	2	1	0	0	4	4
Female	22.8	<25 yr	unmarried	Master's degree or above	21,000-29,999	Private	Tertiary	med	37-48 hours	<3 years	Yes	Yes	Yes	No	0	1	1	1	0	2	2	2	2	2	2	2	5	5	3	4	5	1	3	6	4	3	5	4	0	3	3	1	3	3	3	3	1	3	4
Female	23	<25 yr	married	Bachelor's degree	<21,000	Private	Primary	med	37-48 hours	<3 years	No	Yes	No	No	0	3	0	0	0	1	1	1	1	2	1	1	1	1	4	1	1	1	1	1	1	1	3	1	3	1	0	0	0	0	0	0	0	1	1
Female	26	25-29 yr	married	Bachelor's degree	>29,999	Private	Secondary	general	37-48 hours	3-5 years	No	Yes	No	Yes	0	0	0	0	0	1	1	1	2	1	1	1	1	2	4	3	4	3	1	1	4	1	3	1	2	1	3	0	1	0	0	0	0	3	3
Female	36.5	>29 yr	married	Bachelor's degree	>29,999	Govt	Secondary	criti	37-48 hours	>5 years	No	Yes	No	No	0	1	0	0	0	2	1	1	2	2	3	2	1	1	3	1	1	1	2	1	3	1	2	1	0	0	0	1	3	0	0	0	0	4	4
Female	34	>29 yr	married	Diploma degree	>29,999	Govt	Tertiary	med	37-48 hours	>5 years	No	Yes	No	No	0	3	0	0	0	1	1	1	1	2	1	2	1	1	1	4	3	1	1	3	2	1	7	1	1	1	1	2	0	1	1	1	0	3	4
Female	29	25-29 yr	unmarried	Master's degree or above	21,000-29,999	Govt	Tertiary	med	<37 hours	3-5 years	No	Yes	No	No	0	3	0	2	0	2	3	1	5	3	3	3	1	2	1	3	1	7	1	2	1	1	7	2	3	2	0	0	2	2	0	0	0	3	2
Female	40	>29 yr	married	Master's degree or above	>29,999	Govt	Tertiary	criti	<37 hours	>5 years	Yes	Yes	Yes	No	0	1	1	0	0	2	2	3	1	2	1	2	2	2	6	5	2	1	2	2	4	3	3	2	0	2	2	2	1	1	1	0	0	5	5
Female	42	>29 yr	married	Bachelor's degree		Govt	Tertiary	surg	37-48 hours	>5 years	Yes	Yes	No	No	0	0	0	0	0	2	3	1	1	1	1	5	1	1	3	1	2	1	1	2	1	1	3	1	3	1	1	1	0	2	0	1	0	3	3
Female	28	25-29 yr	unmarried	Diploma degree	21,000-29,999	Govt	Tertiary	em	<37 hours	3-5 years	No	Yes	No	No	0	0	0	0	0	2	2	1	1	2	2	1	1	1	7	4	3	1	2	3	3	3	5	2	1	2	0	1	1	2	0	1	1	5	2
Female	25	25-29 yr	unmarried	Diploma degree	21,000-29,999	Govt	Tertiary	general	37-48 hours	3-5 years	No	Yes	Yes	No	0	3	0	0	0	2	1	2	1	2	5	2	2	5	4	6	1	1	5	1	3	3	4	1	3	0	0	1	0	0	3	0	0	4	5
Female	23.5	<25 yr	unmarried	Diploma degree	<21,000	Private	Tertiary	general	>48 hours	<3 years	No	No	No	No	0	1	0	0	0	1	1	1	1	1	2	1	1	2	3	3	6	1	1	3	3	3	3	3	3	0	3	1	0	2	0	0	0	3	3
Female	22.4	<25 yr	married	Diploma degree	<21,000	Private	Tertiary	criti	<37 hours	<3 years	No	Yes	No	No	0	3	1	0	0	2	2	3	4	3	2	1	2	2	5	5	6	4	3	5	6	6	7	5	2	1	1	2	0	0	0	0	0	3	2
Female	31.6	>29 yr	married	Diploma degree	21,000-29,999	Govt	Secondary	criti	<37 hours	>5 years	Yes	Yes	Yes	Yes	0	3	2	0	0	5	2	2	2	3	5	3	5	5	4	7	4	5	7	7	4	7	7	1	3	3	3	3	3	3	0	0	3	5	5
Female	24	<25 yr	unmarried	Bachelor's degree	<21,000	Private	Primary	criti	37-48 hours	<3 years	Yes	Yes	No	No	0	0	0	0	0	1	1	2	1	1	2	1	2	1	5	4	4	2	1	3	5	3	3	4	1	1	1	0	1	1	0	0	0	5	4
Female	30	>29 yr	married	Bachelor's degree	>29,999	Govt	Tertiary	general	<37 hours	>5 years	Yes	Yes	No	No	0	1	0	2	0	1	2	1	1	2	2	5	1	1	3	1	2	2	1	3	2	1	3	1	3	0	0	1	0	2	1	0	0	4	4
Female	24.6	<25 yr	unmarried	Bachelor's degree	<21,000	Private	Tertiary	gyn	37-48 hours	>5 years	Yes	Yes	Yes	Yes	0	0	0	0	1	2	1	2	2	2	2	2	2	1	2	2	2	1	1	2	1	2	4	1	3	1	0	0	0	1	2	0	1	3	4
Female	28.4	25-29 yr	married	Bachelor's degree	>29,999	Govt	Tertiary	surg	<37 hours	>5 years	No	Yes	No	No	0	2	1	0	0	2	2	2	2	2	3	2	4	2	4	4	4	3	3	3	4	3	3	3	2	1	1	1	1	1	1	1	1	4	4
Female	27	25-29 yr	married	Bachelor's degree	21,000-29,999	Govt	Tertiary	gyn	37-48 hours	>5 years	No	Yes	No	No	0	3	0	0	0	2	2	2	2	2	1	2	2	2	1	1	1	7	7	7	1	1	7	1	3	0	0	0	0	3	0	0	0	5	5
Female	25.5	25-29 yr	unmarried	Bachelor's degree	21,000-29,999	Govt	Tertiary	criti	<37 hours	<3 years	No	Yes	No	No	3	3	3	0	0	3	2	3	2	2	2	3	1	2	3	6	6	4	5	4	4	6	6	3	1	1	3	2	3	3	3	1	0	4	4
Female	28.8	25-29 yr	married	Master's degree or above	<21,000	Private	Tertiary	criti	<37 hours	>5 years	No	Yes	No	No	1	2	2	0	0	2	2	2	3	2	3	2	1	2	4	7	3	3	3	3	2	3	5	2	1	3	2	3	1	3	2	1	1	1	2
Female	26.7	25-29 yr	married	Bachelor's degree	<21,000	Private	Tertiary	criti	37-48 hours	3-5 years	Yes	Yes	No	No	1	2	1	0	0	2	1	1	1	1	2	2	2	1	2	2	2	1	2	5	1	3	1	1	1	1	0	0	0	0	0	0	0	3	4
Female	25.3	25-29 yr	unmarried	Bachelor's degree	21,000-29,999	Private	Secondary	gyn	<37 hours	>5 years	No	No	No	No	0	0	0	0	0	1	2	1	1	5	5	1	2	1	4	4	6	1	1	3	3	3	4	4	3	0	3	1	2	2	0	0	0	3	3
Female	24	<25 yr	unmarried	Diploma degree	<21,000	Private	Secondary	general	37-48 hours	<3 years	Yes	Yes	No	No	0	0	0	0	0	1	1	1	1	1	1	2	2	1	3	2	2	1	1	1	2	1	6	1	1	1	2	1	2	0	0	0	0	4	2
Female	32.3	>29 yr	married	Diploma degree	>29,999	Govt	Secondary	med	<37 hours	>5 years	No	Yes	No	No	0	3	1	0	0	2	2	2	2	2	1	2	2	2	5	4	4	4	4	4	5	4	4	7	1	1	1	3	1	1	1	1	0	3	3
Female	25.2	25-29 yr	unmarried	Diploma degree	<21,000	Private	Tertiary	criti	37-48 hours	3-5 years	No	Yes	No	No	0	3	0	0	0	2	2	2	1	4	2	1	1	2	5	5	3	2	4	2	2	2	2	2	2	1	2	2	0	0	1	1	0	1	1
Female	52	>29 yr	married	Master's degree or above	>29,999	Govt	Tertiary	criti	<37 hours	>5 years	No	Yes	No	No	1	1	0	0	0	2	2	2	2	2	2	2	2	2	5	3	4	2	2	2	4	2	3	3	1	1	2	2	1	1	1	1	1	2	4
Female	30.2	>29 yr	married	Master's degree or above	>29,999	Govt	Tertiary	med	<37 hours	<3 years	No	Yes	No	No	0	2	1	0	0	2	2	1	2	1	2	2	2	1	5	5	6	2	4	4	4	1	4	3	3	1	0	1	1	0	0	0	0	5	5
Female	26	25-29 yr	married	Bachelor's degree	21,000-29,999	Govt	Tertiary	gyn	<37 hours	<3 years	Yes	Yes	No	No	0	0	0	0	0	1	1	1	1	1	2	2	1	1	6	4	4	1	4	4	5	2	5	2	2	0	2	3	0	0	3	2	0	4	4
Female	27	25-29 yr	unmarried	Bachelor's degree	21,000-29,999	Govt	Tertiary	criti	<37 hours	3-5 years	No	Yes	No	No	1	2	0	0	0	2	2	1	3	2	2	2	2	1	4	2	3	2	3	2	3	2	3	2	1	0	1	1	1	0	1	1	1	5	4
Female	28.2	25-29 yr	married	Bachelor's degree	21,000-29,999	Govt	Tertiary	criti	<37 hours	>5 years	No	Yes	Yes	No	0	1	0	0	0	2	2	2	2	2	2	1	2	2	4	4	4	4	4	4	4	4	4	2	1	1	1	1	1	1	0	1	1	3	3
Female	26.5	25-29 yr	married	Master's degree or above	21,000-29,999	Govt	Tertiary	med	37-48 hours	<3 years	Yes	Yes	No	No	0	1	0	0	0	2	2	2	2	1	2	2	1	2	4	3	3	1	1	3	3	1	4	1	3	1	3	0	0	0	0	0	0	4	4
Female	29	25-29 yr	married	Diploma degree	21,000-29,999	Govt	Tertiary	surg	37-48 hours	3-5 years	No	Yes	No	No	0	0	0	0	0	2	4	1	2	2	2	2	2	2	3	2	3	1	3	3	3	4	2	3	1	0	0	1	0	2	2	0	0	5	2
Female	22	<25 yr	married	Bachelor's degree	21,000-29,999	Govt	Tertiary	criti	37-48 hours	3-5 years	No	Yes	No	Yes	0	0	3	0	0	1	1	1	1	1	1	1	1	1	3	4	1	1	3	4	2	1	4	1	3	0	0	0	0	0	0	0	0	4	3
Male	30.8	>29 yr	unmarried	Master's degree or above	21,000-29,999	Govt	Secondary	criti	37-48 hours	>5 years	No	Yes	No	No	0	3	2	0	0	2	2	2	1	2	2	2	2	2	1	3	4	3	5	4	1	3	1	1	3	0	0	0	0	1	0	0	0	4	5
Male	31	>29 yr	married	Bachelor's degree	21,000-29,999	Govt	Tertiary	surg	<37 hours	3-5 years	No	Yes	No	No	1	0	0	0	0	1	2	2	2	2	2	3	2	2	6	2	5	1	3	3	3	3	5	3	3	3	2	2	1	3	1	2	2	5	1
Male	23	<25 yr	unmarried	Bachelor's degree	>29,999	Govt	Tertiary	criti	<37 hours	>5 years	Yes	Yes	Yes	Yes	0	0	0	0	0	1	1	1	1	1	1	1	1	1	1	1	1	2	1	1	1	1	1	1	0	0	0	0	0	0	0	0	0	1	1
Male	30.4	>29 yr	married	Bachelor's degree	>29,999	Govt	Tertiary	surg	37-48 hours	>5 years	No	Yes	Yes	Yes	0	0	0	0	0	1	1	1	5	1	1	1	1	1	1	1	1	1	1	1	1	1	1	1	3	0	0	0	0	3	0	0	0	5	5
Male	27	25-29 yr	unmarried	Master's degree or above	21,000-29,999	Govt	Tertiary	surg	<37 hours	3-5 years	No	Yes	No	No	0	1	1	1	1	2	2	1	2	3	2	1	2	3	2	2	2	2	2	2	3	2	2	3	2	2	2	2	2	1	3	3	2	5	4
Male	25.2	25-29 yr	unmarried	Diploma degree	21,000-29,999	Govt	Tertiary	med	37-48 hours	<3 years	Yes	Yes	No	No	0	3	2	0	1	2	2	2	1	2	1	2	1	2	4	3	1	4	1	2	3	2	5	1	3	0	1	0	0	1	0	0	0	4	4
Male	26.8	25-29 yr	unmarried	Bachelor's degree	<21,000	Private	Tertiary	med	>48 hours	<3 years	Yes	Yes	No	No	2	3	3	0	0	1	1	1	1	5	2	2	2	1	7	7	2	1	1	2	4	2	7	1	2	2	3	2	1	1	1	1	0	3	3
Male	25.8	25-29 yr	married	Bachelor's degree	21,000-29,999	Govt	Tertiary	criti	<37 hours	>5 years	Yes	Yes	No	No	0	3	3	0	0	2	2	2	2	2	2	2	2	2	5	5	4	2	2	6	2	3	2	6	2	1	1	1	1	1	1	1	2	2	2
Male	27	25-29 yr	married	Master's degree or above	>29,999	Private	Secondary	med	>48 hours	<3 years	Yes	Yes	No	No	0	1	1	0	0	1	2	2	2	1	2	2	2	1	1	3	3	1	2	3	1	3	2	1	2	1	0	1	0	1	0	0	0	4	3
Male	30	>29 yr	unmarried	Bachelor's degree	>29,999	Govt	Tertiary	criti	<37 hours	>5 years	No	Yes	No	No	0	3	3	3	0	2	3	4	2	3	3	3	2	3	4	3	4	2	4	3	5	3	1	3	1	2	1	2	1	1	2	1	1	3	3
Male	23	<25 yr	unmarried	Diploma degree	<21,000	Private	Tertiary	surg	37-48 hours	<3 years	Yes	No	No	No	0	1	0	0	0	1	1	1	1	2	2	2	1	1	2	1	2	1	3	4	1	4	2	1	1	1	0	0	0	1	0	0	0	3	4
Male	25	25-29 yr	unmarried	Diploma degree	21,000-29,999	Private	Tertiary	criti	37-48 hours	3-5 years	Yes	No	No	No	0	1	1	1	0	1	1	2	2	1	1	2	1	2	2	1	1	1	2	2	2	2	2	1	3	2	2	0	1	1	1	1	1	2	1
Male	30	>29 yr	unmarried	Master's degree or above	>29,999	Govt	Tertiary	em	37-48 hours	>5 years	No	Yes	Yes	No	0	2	2	1	0	3	4	3	3	5	3	2	3	3	3	3	1	1	1	1	1	1	1	3	3	0	0	1	0	0	0	0	0	4	4
Male	25.5	25-29 yr	unmarried	Bachelor's degree	<21,000	Private	Tertiary	surg	37-48 hours	<3 years	Yes	Yes	No	No	0	0	0	0	0	1	1	1	1	2	1	2	2	2	2	3	7	1	7	7	2	1	2	2	3	1	3	3	1	3	3	1	0	1	1
Male	27.9	25-29 yr	unmarried	Bachelor's degree	21,000-29,999	Govt	Tertiary	em	37-48 hours	>5 years	No	Yes	No	Yes	1	2	1	0	0	1	1	1	1	2	1	1	1	1	4	4	3	1	1	2	1	1	4	1	3	1	1	1	1	1	1	1	0	4	4
Male	33	>29 yr	married	Master's degree or above	21,000-29,999	Govt	Primary	med	<37 hours	>5 years	No	Yes	No	No	0	3	3	0	0	2	2	2	1	2	1	3	2	1	1	1	1	2	2	2	1	1	1	1	3	0	0	0	0	0	0	0	0	5	5
Male	24	<25 yr	unmarried	Diploma degree	<21,000	Private	Tertiary	general	>48 hours	<3 years	Yes	Yes	No	No	1	3	1	1	0	2	2	2	5	2	5	2	2	2	5	5	3	3	5	3	3	5	4	3	3	3	3	0	0	0	2	2	3	3	5
Male	29	25-29 yr	unmarried	Bachelor's degree	>29,999	Govt	Tertiary	surg	<37 hours	>5 years	No	Yes	No	No	0	1	0	0	0	2	2	2	3	3	2	1	1	2	7	5	3	4	4	5	5	2	4	4	0	2	2	1	1	0	1	0	1	3	2
Male	31	>29 yr	married	Diploma degree	21,000-29,999	Govt	Tertiary	em	37-48 hours	>5 years	Yes	Yes	No	No	0	1	2	0	0	4	2	4	2	2	2	3	2	2	7	4	6	1	4	4	3	4	6	4	2	3	0	3	2	1	0	0	0	4	3
Male	24	<25 yr	unmarried	Diploma degree	<21,000	Private	Tertiary	med	>48 hours	<3 years	Yes	Yes	No	Yes	0	2	0	0	0	2	1	1	1	1	2	1	1	1	6	2	1	1	1	1	1	1	2	1	3	0	0	2	3	0	2	0	1	5	5
Male	24.8	<25 yr	unmarried	Diploma degree	>29,999	Private	Primary	general	37-48 hours	<3 years	Yes	Yes	Yes	Yes	0	1	1	0	0	1	1	1	2	5	5	4	3	4	4	1	3	1	4	5	4	1	1	3	3	0	0	0	3	1	0	0	0	4	5
Male	48	>29 yr	married	Master's degree or above	>29,999	Govt	Tertiary	criti	<37 hours	>5 years	No	Yes	No	No	1	1	0	0	0	2	2	2	2	2	2	2	2	2	5	3	4	2	2	2	4	2	3	3	1	1	2	2	1	1	1	1	1	2	4
Male	26	25-29 yr	married	Bachelor's degree	21,000-29,999	Govt	Secondary	em	<37 hours	3-5 years	No	Yes	No	No	3	3	3	3	0	3	2	3	3	5	2	2	3	2	1	3	4	4	4	4	2	7	1	1	3	1	0	1	1	0	0	0	0	5	5
Male	28	25-29 yr	unmarried	Diploma degree	>29,999	Govt	Secondary	criti	37-48 hours	3-5 years	Yes	Yes	No	No	0	3	0	0	0	1	1	1	1	1	1	1	1	1	3	1	1	1	2	1	2	1	3	1	1	0	0	0	0	0	0	0	0	5	5
Male	60	>29 yr	married	Bachelor's degree	>29,999	Private	Tertiary	criti	<37 hours	>5 years	Yes	Yes	No	Yes	3	3	3	0	0	1	5	1	5	5	1	1	5	4	1	1	1	1	1	1	1	1	5	1	3	1	1	0	1	0	0	0	0	4	4
Male	25.3	25-29 yr	unmarried	Master's degree or above	21,000-29,999	Govt	Tertiary	criti	37-48 hours	<3 years	Yes	Yes	Yes	Yes	0	0	0	1	0	1	1	1	1	1	1	1	1	1	2	2	1	1	1	1	2	1	3	2	3	1	0	1	0	1	0	1	0	5	5
Male	28	25-29 yr	married	Bachelor's degree	21,000-29,999	Govt	Tertiary	em	37-48 hours	>5 years	Yes	Yes	No	No	3	3	0	0	0	5	5	1	1	5	1	5	5	5	7	7	7	1	7	7	1	1	7	4	1	1	3	3	3	3	0	1	0	3	4
Male	25	25-29 yr	unmarried	Bachelor's degree	<21,000	Private	Tertiary	med	<37 hours	<3 years	Yes	Yes	No	No	1	1	1	2	1	3	2	1	5	4	5	4	3	3	4	4	4	4	4	4	4	2	3	4	2	2	1	2	1	1	2	2	2	4	4
Male	22.7	<25 yr	unmarried	Bachelor's degree	<21,000	Private	Primary	med	<37 hours	<3 years	Yes	Yes	Yes	Yes	0	0	0	0	0	1	1	1	1	1	1	1	1	1	1	2	1	1	2	2	1	1	1	1	0	0	0	0	0	0	0	0	0	1	1
Male	26	25-29 yr	unmarried	Bachelor's degree	<21,000	Private	Tertiary	general	37-48 hours	<3 years	No	Yes	Yes	Yes	0	1	0	0	0	1	1	1	2	1	2	2	2	1	4	3	4	1	4	3	3	1	4	1	3	0	0	0	0	0	0	0	0	5	5
Male	24.8	<25 yr	unmarried	Bachelor's degree	<21,000	Private	Tertiary	criti	>48 hours	<3 years	Yes	Yes	No	No	2	3	3	0	0	2	2	2	2	2	2	2	2	2	4	4	4	3	3	4	3	1	3	1	3	0	0	0	0	0	0	0	0	3	3
Male	26.8	25-29 yr	married	Bachelor's degree	<21,000	Private	Tertiary	em	37-48 hours	3-5 years	Yes	Yes	Yes	Yes	0	0	0	0	0	1	1	1	1	1	1	1	1	1	3	1	2	2	1	2	2	1	1	1	3	1	0	0	0	0	0	0	0	5	5
Male	22.3	<25 yr	unmarried	Diploma degree	>29,999	Private	Primary	med	>48 hours	<3 years	Yes	Yes	No	No	0	0	0	0	0	1	1	1	1	1	1	2	5	1	5	1	3	1	4	3	2	1	3	1	3	0	0	1	0	0	0	0	0	5	5
Male	26	25-29 yr	married	Bachelor's degree	21,000-29,999	Govt	Secondary	med	<37 hours	3-5 years	No	Yes	No	No	0	0	0	0	0	2	2	1	5	1	1	2	1	1	4	3	7	1	7	7	3	7	3	3	0	3	0	0	0	2	0	0	0	4	3
Male	23	<25 yr	unmarried	Bachelor's degree	<21,000	Private	Secondary	surg	>48 hours	3-5 years	No	Yes	No	No	2	2	0	0	0	2	2	2	5	1	2	2	2	2	4	5	4	2	2	4	2	1	5	1	2	3	3	1	1	2	0	0	0	3	3
Male	28.2	25-29 yr	married	Bachelor's degree	21,000-29,999	Govt	Secondary	em	37-48 hours	>5 years	No	Yes	No	No	0	3	3	0	0	4	3	3	2	2	2	2	2	1	5	5	5	1	2	4	4	3	4	3	3	3	0	1	2	1	1	1	0	3	3
Male	29.4	25-29 yr	unmarried	Bachelor's degree	21,000-29,999	Govt	Tertiary	criti	<37 hours	>5 years	No	Yes	No	No	0	0	0	1	0	1	1	1	1	1	2	2	2	1	1	1	1	1	1	1	1	1	1	1	1	1	1	0	1	0	1	0	0	4	5
Male	25	25-29 yr	unmarried	Bachelor's degree	21,000-29,999	Private	Tertiary	med	37-48 hours	<3 years	Yes	No	No	No	0	1	0	0	0	2	2	5	2	1	2	3	2	2	6	4	2	2	2	2	2	2	2	1	2	1	3	3	3	0	3	1	0	3	4
Male	30	>29 yr	unmarried	Bachelor's degree	>29,999	Govt	Tertiary	general	37-48 hours	>5 years	No	Yes	No	No	2	2	3	0	0	4	2	1	1	2	2	2	2	1	2	3	2	2	3	3	2	2	5	2	2	1	1	0	1	3	0	0	0	4	4
Male	24.6	<25 yr	unmarried	Diploma degree	<21,000	Private	Primary	med	37-48 hours	<3 years	Yes	Yes	No	No	0	0	0	0	0	1	1	1	1	1	1	1	1	1	1	1	1	1	1	1	1	1	1	1	3	0	0	0	0	0	0	0	0	4	4
Male	24.7	<25 yr	unmarried	Master's degree or above	21,000-29,999	Private	Tertiary	med	37-48 hours	<3 years	Yes	Yes	No	Yes	0	2	1	0	0	2	2	4	1	2	1	1	1	1	1	1	1	1	1	3	1	7	1	1	0	0	0	0	0	0	0	0	0	5	5
Male	31.3	>29 yr	married	Diploma degree	21,000-29,999	Govt	Tertiary	general	37-48 hours	<3 years	No	Yes	No	No	1	2	2	0	0	2	2	4	2	4	2	2	2	4	7	6	6	2	7	7	5	3	6	7	1	3	3	3	2	2	2	0	0	2	2
Male	47.4	>29 yr	married	Master's degree or above	>29,999	Govt	Secondary	med	<37 hours	>5 years	No	Yes	No	No	1	3	2	0	0	4	5	2	3	2	2	5	1	4	5	2	6	6	7	7	1	7	2	7	3	2	1	2	2	3	0	2	0	3	3
Male	27	25-29 yr	unmarried	Bachelor's degree	21,000-29,999	Govt	Tertiary	surg	<37 hours	<3 years	Yes	Yes	No	No	0	0	0	0	0	1	1	3	1	1	1	2	2	1	1	1	1	1	2	1	3	1	1	1	2	1	0	0	0	0	0	0	0	4	1
Male	31.4	>29 yr	married	Bachelor's degree	21,000-29,999	Govt	Secondary	surg	37-48 hours	3-5 years	No	Yes	No	No	1	3	0	0	0	3	3	3	4	2	3	2	3	1	3	1	3	1	3	1	1	3	1	3	2	0	0	0	0	0	0	0	0	4	4
Male	28	25-29 yr	married	Diploma degree	>29,999	Govt	Tertiary	med	<37 hours	3-5 years	No	Yes	No	No	0	1	1	0	0	2	2	1	1	1	2	2	2	1	2	1	1	1	2	2	1	1	2	1	3	3	0	3	0	0	0	0	0	5	5
Male	26.2	25-29 yr	unmarried	Bachelor's degree	21,000-29,999	Govt	Tertiary	med	<37 hours	3-5 years	No	Yes	No	No	1	2	2	0	0	2	2	2	1	1	1	1	1	1	2	2	2	2	2	2	2	2	5	3	2	2	0	0	0	0	1	0	0	4	2
Male	26.3	25-29 yr	married	Diploma degree	21,000-29,999	Private	Tertiary	med	<37 hours	3-5 years	No	Yes	No	No	0	0	0	0	0	1	1	1	1	1	1	1	1	1	1	1	1	1	1	1	1	1	1	1	3	0	1	2	1	1	1	1	1	5	5
Male	28	25-29 yr	unmarried	Master's degree or above	21,000-29,999	Govt	Tertiary	criti	37-48 hours	3-5 years	No	Yes	No	No	0	0	0	0	0	2	2	1	1	2	2	2	2	1	4	3	4	3	3	5	2	1	1	2	3	2	2	1	2	1	2	1	2	4	5
Male	30	>29 yr	unmarried	Diploma degree	21,000-29,999	Govt	Secondary	criti	37-48 hours	>5 years	No	Yes	No	No	0	0	0	0	0	5	5	5	1	1	5	5	5	5	1	1	1	1	1	1	1	1	1	1	1	0	0	0	0	0	0	0	0	1	1
Male	27	25-29 yr	unmarried	Bachelor's degree	21,000-29,999	Private	Tertiary	criti	<37 hours	3-5 years	No	Yes	No	No	0	0	0	0	0	2	1	1	1	5	5	2	4	4	7	4	3	1	4	4	4	6	1	5	0	1	0	1	0	0	3	1	0	3	3
Male	25.4	25-29 yr	unmarried	Bachelor's degree	<21,000	Private	Tertiary	med	37-48 hours	<3 years	No	Yes	No	No	2	3	0	0	0	2	1	1	1	2	3	1	1	3	2	3	4	1	2	5	3	2	2	3
Male	25.6	25-29 yr	unmarried	Bachelor's degree	21,000-29,999	Govt	Tertiary	med	<37 hours	<3 years	Yes	Yes	No	No	1	3	2	1	0	2	1	1	1	1	2	1	1	1	4	4	4	1	3	3	4	1	6	1	3	3	2	3	3	2	3	3	0	5	5
Male	24.3	<25 yr	unmarried	Diploma degree		Govt	Secondary	med	37-48 hours	3-5 years	No	No	No	No	2	3	1	0	0	1	2	3	2	4	1	1	2	5	5	6	7	4	5	4	5	5	5	6	3	3	3	3	3	3	2	3	3	4	5
Male	24	<25 yr	unmarried	Diploma degree	>29,999	Private	Primary	em	37-48 hours	3-5 years	Yes	Yes	No	No	0	1	0	0	0	2	2	2	1	2	2	2	2	1	4	4	3	3	3	3	3	2	5	4	3	1	2	1	0	0	0	0	0	4	4
Male	27.4	25-29 yr	unmarried	Diploma degree	21,000-29,999	Govt	Tertiary	med	<37 hours	3-5 years	No	Yes	No	No	0	3	1	0	0	4	4	3	4	5	5	2	3	3	5	5	5	5	6	5	1	1	1	3	2	3	1	2	2	1	2	2	2	2	4
Male	29.3	25-29 yr	married	Diploma degree	>29,999	Govt	Secondary	em	37-48 hours	>5 years	No	Yes	No	No	3	3	3	0	0	4	2	2	2	2	1	2	1	1	4	3	2	1	1	1	3	2	3	1	3	0	0	0	0	0	0	0	0	4	4
Male	29.5	25-29 yr	married	Bachelor's degree	21,000-29,999	Govt	Tertiary	em	<37 hours	>5 years	No	Yes	No	No	2	1	0	0	0	3	2	2	2	2	3	2	2	2	5	4	4	4	5	4	2	3	4	1	2	2	0	0	0	0	0	0	0	3	4
Male	23	<25 yr	unmarried	Diploma degree	<21,000	Private	Tertiary	criti	37-48 hours	<3 years	Yes	Yes	No	No	0	0	0	0	0	1	2	2	2	1	3	1	2	1	5	1	1	1	1	4	1	1	1	2	2	1	0	0	0	1	0	0	0	4	4
Male	33.2	>29 yr	married	Diploma degree	>29,999	Govt	Tertiary	general	>48 hours	>5 years	No	Yes	No	No	0	3	3	0	0	1	3	1	2	2	2	2	2	2	3	1	1	3	1	4	1	3	3	3	3	0	0	0	0	0	0	0	0	5	5
Male	26	25-29 yr	married	Bachelor's degree	21,000-29,999	Govt	Secondary	criti	<37 hours	<3 years	Yes	Yes	No	No	0	3	3	1	0	1	2	1	2	2	2	2	2	2	1	1	1	3	1	3	1	1	1	1	3	0	0	0	2	1	0	0	0	5	5
Male	29	25-29 yr	unmarried	Bachelor's degree	21,000-29,999	Govt	Tertiary	med	<37 hours	3-5 years	No	Yes	No	No	0	3	1	0	0	1	1	1	1	1	2	1	1	1	3	2	2	1	1	1	1	1	1	1	3	0	0	1	0	0	0	0	0	5	5
Male	36.7	>29 yr	married	Bachelor's degree	>29,999	Govt	Tertiary	med	<37 hours	>5 years	No	Yes	No	No	1	3	2	1	0	2	4	3	4	3	5	5	5	5	4	4	5	4	4	4	4	1	1	2	1	1	2	1	0	1	0	1	1	3	3
Male	26.6	25-29 yr	unmarried	Bachelor's degree	<21,000	Private	Secondary	med	37-48 hours	<3 years	No	Yes	No	No	0	3	3	2	1	2	2	2	2	2	1	2	2	2	6	3	3	4	3	3	3	3	5	4	2	2	2	1	1	3	2	0	2	3	5
Male	30	>29 yr	married	Bachelor's degree	>29,999	Govt	Tertiary	general	<37 hours	3-5 years	No	Yes	Yes	No	2	0	0	0	0	2	1	2	2	2	2	2	1	1	4	2	1	3	1	1	3	1	3	1	3	3	1	0	0	0	0	0	0	5	5
Male	23	<25 yr	unmarried	Diploma degree	21,000-29,999	Private	Tertiary	surg	>48 hours	<3 years	Yes	Yes	No	No	0	2	0	0	0	1	1	2	1	1	2	1	1	2	4	1	2	2	1	3	1	4	4	4	2	3	2	2	1	2	1	0	0	2	3
Male	24.3	<25 yr	unmarried	Diploma degree	21,000-29,999	Private	Tertiary	criti	>48 hours	3-5 years	Yes	Yes	Yes	No	0	0	0	0	0	1	1	1	1	1	2	2	2	1	5	4	3	1	1	4	3	3	5	3	3	1	3	3	3	1	0	0	0	3	5
Male	37.7	>29 yr	married	Bachelor's degree	>29,999	Govt	Tertiary	med	<37 hours	>5 years	No	Yes	No	No	0	2	2	0	0	2	2	2	2	2	4	2	4	2	2	2	3	1	1	2	2	2	2	2	2	1	1	0	0	1	1	0	0	4	3
Male	26	25-29 yr	married	Master's degree or above	21,000-29,999	Govt	Tertiary	general	37-48 hours	3-5 years	No	Yes	No	No	0	2	1	0	0	2	2	2	2	2	1	2	2	2	3	2	2	1	1	2	2	1	2	1	3	1	2	1	3	3	0	0	0	4	4
Male	27	25-29 yr	married	Diploma degree	21,000-29,999	Govt	Secondary	em	<37 hours	3-5 years	No	Yes	No	No	0	3	3	0	0	1	1	2	2	2	1	1	1	1	5	7	7	3	6	6	4	4	3	4	1	3	2	3	2	1	3	0	0	4	3
Male	24	<25 yr	unmarried	Diploma degree	<21,000	Private	Secondary	med	>48 hours	<3 years	No	No	No	No	0	3	3	0	0	2	1	1	1	3	3	1	1	1	5	1	1	1	1	1	4	3	7	7	2	1	0	1	1	3	0	0	0	2	1
Male	28	25-29 yr	married	Bachelor's degree	21,000-29,999	Govt	Primary	general	37-48 hours	3-5 years	No	Yes	No	No	1	3	3	0	0	5	5	5	5	5	5	5	5	5	7	7	7	7	7	7	4	7	6	7	2	3	1	1	2	3	3	3	0	1	1
Male	27.8	25-29 yr	unmarried	Bachelor's degree	<21,000	Private	Tertiary	surg	<37 hours	<3 years	Yes	Yes	No	No	1	3	3	0	0	2	1	1	1	1	1	1	1	1	7	1	1	1	1	1	7	1	7	1	3	0	3	0	3	0	0	0	0	4	5
Male	22.8	<25 yr	unmarried	Diploma degree	>29,999	Private	Primary	general	37-48 hours	<3 years	Yes	Yes	No	Yes	0	0	0	0	0	2	1	2	1	1	1	1	1	1	2	1	1	2	1	1	1	1	1	1	3	0	1	0	0	0	0	1	0	5	5
Male	25.3	25-29 yr	unmarried	Diploma degree	21,000-29,999	Private	Tertiary	general	<37 hours	<3 years	Yes	Yes	No	No	1	3	3	0	0	2	2	2	2	2	5	3	5	3	4	3	2	1	4	2	5	5	4	2	3	1	0	3	0	1	0	0	0	4	4
Male	32	>29 yr	married	Master's degree or above	>29,999	Govt	Tertiary	em	37-48 hours	>5 years	No	Yes	No	No	2	3	3	2	1	2	5	3	3	4	4	3	3	2	4	4	4	5	4	5	4	3	2	4	3	1	0	1	0	0	1	0	0	3	3
Male	28	25-29 yr	unmarried	Bachelor's degree	21,000-29,999	Govt	Tertiary	surg	37-48 hours	3-5 years	No	Yes	No	No	1	3	1	0	0	4	3	3	3	4	5	3	3	2	5	6	5	5	6	6	4	4	5	7	1	3	2	2	1	2	2	1	0	2	2
Male	28	25-29 yr	married	Master's degree or above	21,000-29,999	Govt	Tertiary	med	<37 hours	3-5 years	No	Yes	Yes	No	1	3	0	0	0	2	5	5	5	2	2	5	5	5	6	4	4	3	4	4	4	5	6	5	1	3	3	1	1	3	1	0	0	3	3
Male	28	25-29 yr	unmarried	Master's degree or above	>29,999	Govt	Tertiary	criti	<37 hours	3-5 years	No	Yes	No	No	0	3	0	0	0	2	2	1	1	2	2	2	2	1	1	1	1	1	1	4	1	1	1	1	2	1	0	1	0	1	0	2	0	3	4
Male	25.3	25-29 yr	married	Bachelor's degree	21,000-29,999	Private	Secondary	gyn	<37 hours	>5 years	Yes	Yes	Yes	Yes	0	0	0	0	0	1	1	1	1	1	1	1	1	1	4	4	1	1	1	1	4	1	4	4	3	0	0	1	0	0	0	0	0	5	4
Male	25.2	25-29 yr	unmarried	Bachelor's degree	>29,999	Private	Primary	med	37-48 hours	<3 years	Yes	Yes	No	No	0	0	0	0	0	1	2	1	1	2	4	2	1	2	6	5	5	1	4	4	1	2	6	1	3	3	3	1	1	0	0	0	0	4	4
Male	25	25-29 yr	married	Bachelor's degree	>29,999	Private	Primary	criti	37-48 hours	<3 years	Yes	Yes	No	No	1	3	0	0	0	1	3	3	3	2	2	1	5	5	3	1	7	6	6	7	1	3	7	7	2	2	2	1	2	1	2	2	1	5	5
Male	25	25-29 yr	unmarried	Bachelor's degree	<21,000	Private	Tertiary	med	<37 hours	<3 years	No	Yes	No	No	0	3	3	1	0	3	2	5	2	5	2	5	4	5	5	7	7	4	7	6	6	7	6	7	0	3	3	3	3	3	3	1	2	2	2
Male	23.9	<25 yr	unmarried	Bachelor's degree	<21,000	Private	Tertiary	surg	<37 hours	3-5 years	Yes	Yes	No	No	0	3	2	0	0	2	1	3	2	2	5	2	2	4	4	3	2	3	6	4	3	5	1	5	1	3	3	2	1	1	1	2	1	1	1
Male	26	25-29 yr	unmarried	Bachelor's degree	21,000-29,999	Govt	Tertiary	criti	<37 hours	3-5 years	No	Yes	No	No	0	2	2	0	0	3	5	4	5	4	5	3	5	3	5	2	3	1	5	5	6	4	2	2	3	0	0	2	1	0	0	0	0	5	5
Male	29	25-29 yr	married	Diploma degree	>29,999	Govt	Tertiary	med	37-48 hours	3-5 years	No	Yes	Yes	No	1	1	2	0	0	5	4	1	2	2	5	5	2	1	5	4	7	3	7	7	4	2	1	1	0	0	0	0	1	1	0	0	0	4	5
Male	25	25-29 yr	married	Diploma degree	<21,000	Private	Tertiary	surg	37-48 hours	<3 years	Yes	Yes	Yes	Yes	0	3	1	0	0	4	1	1	1	1	1	1	1	1	1	1	1	1	1	1	1	1	1	1	0	0	0	0	0	0	0	1	0	5	3
Male	23	<25 yr	unmarried	Diploma degree	<21,000	Private	Tertiary	med	37-48 hours	<3 years	Yes	Yes	No	No	0	0	0	0	0	1	1	2	1	1	2	2	1	2	1	3	3	1	3	5	1	1	1	1	3	1	0	1	2	3	0	1	0	3	5
Male	24	<25 yr	unmarried	Diploma degree	<21,000	Private	Tertiary	criti	>48 hours	<3 years	No	No	No	No	1	2	3	0	0	5	5	3	3	5	2	2	5	5	5	7	5	3	3	5	2	3	7	2	3	3	3	3	3	3	3	3	3	3	4
Male	32	>29 yr	married	Master's degree or above	>29,999	Govt	Tertiary	general	>48 hours	>5 years	No	Yes	No	No	1	1	1	0	0	4	2	2	2	1	1	2	1	2	5	4	3	2	2	3	5	2	7	4	2	1	2	2	2	1	3	2	2	3	2
Male	38	>29 yr	married	Master's degree or above	>29,999	Govt	Tertiary	criti	<37 hours	>5 years	No	Yes	No	No	0	1	0	0	0	2	2	2	1	2	2	1	2	2	2	3	3	2	3	4	4	2	2	2	0	1	1	1	1	1	2	1	0	2	2
Male	26.9	25-29 yr	married	Bachelor's degree	<21,000	Private	Tertiary	criti	37-48 hours	<3 years	Yes	Yes	No	No	0	2	0	0	0	5	2	2	2	1	2	2	2	2	4	4	4	1	3	1	3	2	4	1	2	1	0	1	3	1	0	1	0	2	4
Male	27.6	25-29 yr	married	Master's degree or above	>29,999	Govt	Tertiary	surg	<37 hours	3-5 years	No	Yes	No	No	1	2	3	1	0	3	4	3	3	3	5	3	4	2	5	5	5	5	5	5	3	6	6	4	2	2	2	2	1	2	1	1	2	2	3
Male	26.2	25-29 yr	married	Diploma degree	21,000-29,999	Govt	Secondary	med	37-48 hours	3-5 years	No	Yes	No	No	0	0	1	0	0	1	1	2	1	2	1	2	1	1	2	1	2	1	1	1	1	1	2	1	2	0	1	1	0	0	1	0	0	5	5
Male	26	25-29 yr	married	Diploma degree	21,000-29,999	Govt	Tertiary	em	<37 hours	3-5 years	Yes	Yes	No	Yes	0	0	0	0	0	1	1	1	1	1	1	1	1	1	4	4	1	1	2	1	1	1	4	1	2	0	1	0	3	0	0	0	0	3	3
Male	30	>29 yr	unmarried	Master's degree or above	>29,999	Govt	Tertiary	surg	37-48 hours	>5 years	No	Yes	No	No	1	3	1	0	0	2	2	2	2	2	2	2	2	2	4	6	6	3	5	6	2	2	6	5	1	2	3	1	1	1	1	1	1	2	2
Male	31	>29 yr	unmarried	Bachelor's degree	>29,999	Govt	Tertiary	criti	<37 hours	>5 years	Yes	Yes	No	No	0	1	1	0	0	2	2	2	2	2	2	2	2	2	7	2	3	1	3	4	2	2	3	2	0	1	2	3	2	3	2	2	1	2	3
Male	27.7	25-29 yr	married	Bachelor's degree	<21,000	Private	Tertiary	criti	37-48 hours	>5 years	Yes	Yes	No	Yes	2	3	0	0	0	1	1	2	2	2	1	2	2	2	2	1	2	1	1	2	1	2	1	1	1	2	2	2	3	0	1	2	0	2	1
Male	23.8	<25 yr	unmarried	Diploma degree	>29,999	Private	Tertiary	criti	37-48 hours	<3 years	Yes	Yes	No	No	0	3	1	0	0	1	2	1	2	1	1	1	1	1	4	4	1	2	2	1	3	2	2	2	3	1	0	0	0	0	0	0	0	5	4
Male	30	>29 yr	unmarried	Diploma degree	21,000-29,999	Govt	Tertiary	surg	<37 hours	3-5 years	No	Yes	No	No	1	1	0	0	0	1	2	1	2	2	2	2	2	1	3	2	3	1	2	4	2	2	2	2	0	0	0	0	0	0	0	1	0	1	4
Male	25.2	25-29 yr	married	Bachelor's degree	>29,999	Private	Primary	med	37-48 hours	3-5 years	Yes	Yes	No	Yes	0	0	2	0	0	1	1	2	3	1	3	2	2	2	3	2	3	2	1	3	2	5	2	4	2	2	1	2	3	1	0	0	0	3	4
Male	25	25-29 yr	unmarried	Diploma degree	<21,000	Private	Tertiary	general	37-48 hours	<3 years	Yes	Yes	No	No	0	0	0	0	0	1	1	2	1	1	2	2	2	1	4	4	1	2	2	2	4	2	1	2	3	1	1	1	0	0	0	0	0	4	4
Male	33	>29 yr	unmarried	Bachelor's degree	>29,999	Govt	Tertiary	general	<37 hours	>5 years	No	Yes	No	No	1	2	0	0	0	2	2	1	3	2	2	2	2	1	4	2	3	2	3	2	3	2	3	2	1	0	1	1	1	0	1	1	1	5	4
Male	35	>29 yr	married	Master's degree or above	>29,999	Govt	Tertiary	criti	37-48 hours	>5 years	Yes	Yes	No	No	0	0	0	0	0	1	1	1	1	2	3	3	1	1	2	1	2	1	1	1	2	1	2	1	2	0	0	0	0	0	3	0	0	4	4
Male	24	<25 yr	unmarried	Bachelor's degree	>29,999	Private	Secondary	criti	<37 hours	3-5 years	Yes	No	No	No	0	3	3	0	0	2	3	2	2	2	1	2	5	2	4	4	3	1	3	4	3	1	5	1	3	1	0	0	3	3	3	0	0	2	5
Male	29	25-29 yr	married	Bachelor's degree	21,000-29,999	Govt	Tertiary	med	<37 hours	3-5 years	No	Yes	No	No	0	2	1	0	1	2	1	1	2	2	2	2	2	2	3	4	4	1	5	3	3	1	1	1	3	2	0	0	0	0	0	0	0	4	4
Male	23	<25 yr	unmarried	Diploma degree	>29,999	Private	Tertiary	criti	37-48 hours	<3 years	No	No	No	No	0	3	0	0	0	2	5	1	5	5	5	5	5	4	7	7	1	1	6	4	1	7	7	7	3	0	0	0	3	3	2	2	0	1	5
Male	28	25-29 yr	married	Master's degree or above	21,000-29,999	Govt	Tertiary	criti	37-48 hours	3-5 years	No	Yes	No	No	0	3	1	0	0	2	2	2	2	2	2	2	2	2	1	4	1	1	4	4	3	1	3	1	3	0	1	0	0	0	0	0	0	4	4
Male	28	25-29 yr	married	Master's degree or above	21,000-29,999	Govt	Tertiary	em	<37 hours	3-5 years	No	Yes	No	No	0	0	0	0	0	2	1	2	1	2	2	2	2	1	4	3	3	3	3	3	2	2	2	3	3	2	3	3	3	2	2	2	2	4	5
Male	21.5	<25 yr	unmarried	Bachelor's degree	<21,000	Private	Tertiary	med	<37 hours	3-5 years	No	Yes	No	No	0	0	0	0	0	1	1	1	1	1	3	2	1	1	2	2	3	3	1	1	3	1	3	1	3	3	0	0	0	0	0	0	0	4	4
Male	25	25-29 yr	unmarried	Master's degree or above	21,000-29,999	Private	Tertiary	criti	37-48 hours	<3 years	Yes	No	No	No	0	0	0	0	0	2	1	1	1	2	2	1	2	1	4	4	4	2	2	3	1	4	3	2	2	1	0	1	1	0	0	0	0	4	1
Male	26.2	25-29 yr	married	Diploma degree	21,000-29,999	Govt	Secondary	em	37-48 hours	3-5 years	No	Yes	No	No	0	0	0	0	0	1	1	3	1	1	1	1	3	1	1	3	1	1	1	1	3	1	4	3	3	0	1	0	0	0	0	0	0	5	5
Male	24	<25 yr	married	Diploma degree		Private	Tertiary	general	37-48 hours	<3 years	Yes	Yes	Yes	Yes	0	0	0	0	0	1	2	1	1	2	2	1	1	1	2	3	3	1	1	1	2	1	3	1	0	1	1	1	1	0	1	0	0	1	1
Male	27.3	25-29 yr	unmarried	Bachelor's degree	<21,000	Private	Tertiary	med	<37 hours	3-5 years	Yes	Yes	No	No	0	0	0	0	0	1	1	1	1	3	1	2	1	1	7	2	1	1	1	2	3	1	2	1	3	2	2	2	1	2	2	2	0	4	5
Male	23.4	<25 yr	unmarried	Diploma degree		Private	Secondary	criti	<37 hours	<3 years	Yes	No	No	No	0	0	0	0	0	1	1	2	2	1	1	1	1	1	4	1	1	1	1	1	1	1	1	1	3	0	1	0	0	0	0	0	0	2	1
Male	30	>29 yr	married	Bachelor's degree	21,000-29,999	Govt	Tertiary	med	37-48 hours	>5 years	No	Yes	No	No	0	3	2	0	0	2	2	2	2	4	4	4	3	5	4	4	5	3	3	4	2	2	5	2	2	1	1	1	1	2	2	1	0	4	3
Male	27	25-29 yr	married	Master's degree or above	21,000-29,999	Govt	Tertiary	general	<37 hours	<3 years	No	Yes	No	No	0	1	0	0	0	1	2	1	1	1	2	1	1	1	1	1	1	1	4	3	1	1	1	1	3	2	2	0	0	0	0	0	0	5	5
Male	25	25-29 yr	unmarried	Bachelor's degree	<21,000	Private	Secondary	em	<37 hours	3-5 years	Yes	Yes	No	No	0	3	2	0	0	1	1	1	1	1	1	1	5	1	4	4	3	3	3	4	3	3	4	1	3	1	0	1	2	3	0	1	0	1	2
Male	31	>29 yr	married	Bachelor's degree	21,000-29,999	Govt	Tertiary	general	<37 hours	3-5 years	No	Yes	No	No	0	3	3	0	0	3	2	2	1	2	2	4	2	1	7	7	6	2	6	6	1	2	2	4	1	1	0	1	1	1	0	0	0	4	4
Male	22.8	<25 yr	unmarried	Diploma degree	>29,999	Private	Tertiary	med	<37 hours	<3 years	Yes	No	No	No	0	3	3	0	0	2	2	5	2	2	2	5	5	2	4	5	4	1	2	5	2	2	1	1	1	0	0	1	0	1	3	0	0	4	4
Male	22.3	<25 yr	unmarried	Diploma degree	<21,000	Private	Tertiary	em	37-48 hours	<3 years	Yes	Yes	No	No	0	3	1	1	0	2	1	2	2	3	3	1	3	1	5	3	5	3	3	5	3	4	3	4	2	1	1	0	1	0	0	0	0	2	5
Male	23.9	<25 yr	married	Diploma degree	<21,000	Private	Tertiary	med		<3 years	No	Yes	No	No	0	1	0	0	0	2	1	1	1	1	1				6	1	1	1	1	1	2	1	1	1	3	1	0	2	3	0	3	1	0	3	4
Male	25	25-29 yr	married	Bachelor's degree	<21,000	Private	Primary	med	37-48 hours	<3 years	Yes	Yes	No	No	0	1	0	0	0	1	2	1	1	1	2	1	2	1	2	2	1	1	1	4	3	4	5	2	2	0	1	1	2	2	2	1	1	4	5
Male	28.5	25-29 yr	married	Bachelor's degree	21,000-29,999	Govt	Tertiary	surg	<37 hours	>5 years	Yes	Yes	Yes	No	0	0	0	0	0	1	1	1	1	1	3	4	1	1	1	1	1	1	1	1	2	1	3	5	3	0	0	0	0	0	3	0	0	4	4
Male	24.8	<25 yr	married	Diploma degree	<21,000	Private	Tertiary	surg	>48 hours	3-5 years	No	No	No	Yes	0	0	0	3	3																				2	2	3	3	0	2	3	3	0	3	4
Male	25	25-29 yr	unmarried	Bachelor's degree	>29,999	Private	Primary	em	37-48 hours	<3 years	Yes	Yes	No	Yes	0	0	0	0	0	1	2	1	2	1	2	2	2	1	3	4	4	1	3	3	1	2	2	2	1	1	1	1	3	1	1	0	0	3	4
Male	25	25-29 yr	unmarried	Diploma degree	<21,000	Private	Tertiary	gyn	37-48 hours	>5 years	Yes	Yes	No	Yes	0	3	0	0	0	5	1	1	5	2	5	5	5	5	4	7	2	1	1	4	3	6	4	1	3	2	0	0	0	3	0	0	3	5	4
Male	23	<25 yr	unmarried	Bachelor's degree	<21,000	Private	Tertiary	general	37-48 hours	<3 years	No	Yes	No	No	2	0	1	0	0	2	2	1	1	2	2	1	1	1	4	3	3	1	1	2	3	1	4	2	2	0	0	3	0	2	1	0	2	4	4
Male	25.8	25-29 yr	married	Bachelor's degree	>29,999	Private	Primary	general	37-48 hours	3-5 years	Yes	Yes	Yes	Yes	0	0	0	0	0	1	1	1	1	1	2	1	1	1	4	1	1	1	1	1	1	1	1	1	3	0	1	2	0	0	0	0	0	5	5
Male	24.6	<25 yr	married	Diploma degree	<21,000	Private	Tertiary	criti	37-48 hours	<3 years	Yes	No	No	No	0	1	0	0	0	1	2	3	5	1	2	1	1	1	4	4	5	1	3	6	1	2	5	1	0	3	3	3	0	0	0	0	0	3	3
Male	26	25-29 yr	unmarried	Bachelor's degree	21,000-29,999	Govt	Tertiary	med	37-48 hours	3-5 years	No	Yes	No	Yes	0	0	1	0	0	1	2	2	2	1	2	2	3	1	3	3	2	1	3	2	2	3	3	2	2	2	2	2	2	0	2	2	0	2	5
Male	23	<25 yr	married	Bachelor's degree	<21,000	Private	Tertiary	criti	<37 hours	<3 years	Yes	Yes	Yes	Yes	0	1	0	0	0	1	2	1	1	1	2	1	1	1	5	3	1	1	2	1	2	2	7	2	3	1	0	1	0	0	0	0	0	5	5
Male	26	25-29 yr	married	Bachelor's degree	>29,999	Private	Primary	em	37-48 hours	3-5 years	Yes	Yes	Yes	Yes	0	0	0	0	0	1	2	1	2	1	2	2	1	1	1	1	2	2	2	2	2	1	1	4	1	1	0	0	0	1	1	0	0	5	1
Male	38.4	>29 yr	married	Bachelor's degree	>29,999	Govt	Tertiary	surg	<37 hours	>5 years	No	Yes	Yes	No	0	2	0	0	0	2	2	2	2	1	3	1	4	2	5	5	5	4	4	5	5	5	5	4	1	2	2	3	2	1	1	1	1	2	2
Male	27	25-29 yr	married	Master's degree or above	21,000-29,999	Govt	Primary	med	>48 hours	3-5 years	No	No	No	No	1	1	2	0	0	2	2	5	3	2	2	2	2	2	5	3	4	3	6	5	1	4	3	4	2	3	2	3	2	3	3	1	1	1	2
Male	24	<25 yr	unmarried	Bachelor's degree	<21,000	Private	Tertiary	em	<37 hours	<3 years	No	Yes	No	No	0	3	3	0	0	1	1	1	1	2	2	2	2	2	4	4	4	1	4	4	4	3	3	1	1	0	0	0	1	0	0	0	0	3	3
Male	25.3	25-29 yr	married	Diploma degree	<21,000	Private	Secondary	general	37-48 hours	<3 years	No	No	No	No	3	0	0	0	0	3	1	1	2	1	2	1	1	1	4	5	2	1	3	3	4	1	3	2	2	1	1	3	1	3	3	0	0	3	4
Male	28.8	25-29 yr	unmarried	Bachelor's degree	<21,000	Private	Tertiary	gyn	37-48 hours	3-5 years	Yes	No	No	No	1	1	0	0	0	2	1	1	1	3	1	2	1	1	5	6	4	2	1	6	5	1	5	1	3	2	2	2	2	0	1	1	0	4	4
Male	26	25-29 yr	unmarried	Diploma degree	21,000-29,999	Govt	Secondary	em	37-48 hours	3-5 years	No	Yes	No	No	1	3	2	0	0	2	1	2	2	2	2	1	1	1	5	3	4	3	3	4	2	1	5	1	2	3	1	2	3	2	2	0	3	2	2
Male	27.9	25-29 yr	unmarried	Master's degree or above	>29,999	Private	Tertiary	criti	37-48 hours	3-5 years	No	Yes	No	No	0	0	0	0	0	1	1	1	1	1	1	1	1	1	3	1	1	1	1	1	1	1	4	1	3	0	0	0	0	0	0	0	0	4	5
Male	25	25-29 yr	unmarried	Diploma degree	>29,999	Private	Tertiary	surg	37-48 hours	<3 years	Yes	No	No	No	0	0	2	0	0	1	2	2	1	1	2	1	1	2	3	3	4	1	4	3	4	2	3	1	3	1	0	0	2	3	0	0	0	5	5
Male	23	<25 yr	unmarried	Diploma degree	>29,999	Private	Primary	med	37-48 hours	<3 years	No	No	No	No	0	2	0	0	0	2	2	2	1	2	2	2	2	1	3	1	3	3	3	4	3	3	3	3	3	1	1	1	2	1	2	1	0	4	4
Male	26	25-29 yr	married	Diploma degree	<21,000	Private	Primary	surg	37-48 hours	3-5 years	No	Yes	No	Yes	0	1	0	0	0	1	1	2	1	1	1	1	1	1	4	3	1	1	1	4	4	1	5	1	3	0	0	2	2	0	3	0	0	4	4
Male	39	>29 yr	married	Bachelor's degree	>29,999	Govt	Secondary	med	<37 hours	>5 years	Yes	Yes	No	No	0	0	0	0	0	1	2	2	1	2	1	1	2	1	3	1	1	1	1	3	1	1	5	1	3	0	0	0	0	0	0	0	0	5	5
Male	25	25-29 yr	unmarried	Bachelor's degree	21,000-29,999	Govt	Primary	general	37-48 hours	<3 years	No	Yes	No	No	1	1	0	1	0	1	1	1	1	1	1	1	1	1	3	1	1	1	1	1	1	1	3	1	3	0	0	0	0	0	0	0	0	5	5
Male	24.5	<25 yr	married	Master's degree or above	>29,999	Private	Secondary	criti	37-48 hours	<3 years	No	Yes	No	No	0	3	2	0	0	2	2	3	2	2	2	1	3	2	3	5	6	3	5	6	1	3	2	7	1	1	1	0	0	1	1	0	0	4	4
Male	25	25-29 yr	unmarried	Diploma degree	<21,000	Private	Tertiary	general	>48 hours	3-5 years	No	No	No	Yes	1	1	0	0	1	1	1	1	1	1	2	2	2	1	1	2	1	2	1	1	1	1	1	1	0	1	1	1	0	1	1	1	1	1	1
Male	28	25-29 yr	unmarried	Master's degree or above	21,000-29,999	Private	Tertiary	med	>48 hours	3-5 years	Yes	Yes	Yes	Yes	0	0	0	0	0	2	2	1	1	1	1	2	3	1	3	4	3	2	3	2	3	1	3	4	3	1	2	1	1	0	0	0	0	5	5
Male	28.4	25-29 yr	unmarried	Master's degree or above	<21,000	Private	Tertiary	med	<37 hours	3-5 years	No	Yes	No	No	1	2	0	0	0	1	1	1	1	1	2	2	1	1	4	3	3	3	3	4	4	3	2	1	2	1	1	1	1	1	0	0	0	4	4
Male	24.5	<25 yr	married	Diploma degree	<21,000	Private	Secondary	em	37-48 hours	3-5 years	Yes	Yes	No	Yes	1	0	0	0	0	2	2	1	1	2	1	1	2	1	3	1	3	1	1	1	1	1	7	1	3	0	3	0	3	0	0	3	0	4	3
Male	27.8	25-29 yr	unmarried	Diploma degree	21,000-29,999	Govt	Tertiary	criti	<37 hours	3-5 years	Yes	Yes	No	No	0	0	0	0	0	2	3	1	1	1	1	5	1	1	3	1	2	1	1	2	2	1	3	1	3	1	1	1	0	2	0	1	0	3	3
Male	32	>29 yr	married	Master's degree or above	>29,999	Govt	Tertiary	surg	<37 hours	>5 years	No	Yes	No	No	1	3	2	0	0	2	1	1	1	1	1	1	1	1	3	1	1	1	3	1	1	1	3	4	3	0	0	0	0	0	0	0	0	3	3
Male	28.5	25-29 yr	unmarried	Bachelor's degree	21,000-29,999	Govt	Tertiary	criti	<37 hours	3-5 years	No	Yes	No	Yes	0	3	3	0	0	2	1	1	1	2	1	1	1	1	4	3	1	1	1	1	1	1	1	1	3	0	0	0	0	0	0	0	0	4	4
Male	26.8	25-29 yr	unmarried	Diploma degree	>29,999	Private	Primary	criti	37-48 hours	<3 years	Yes	Yes	Yes	No	0	1	0	0	0	1	1	1	1	1	2	1	1	1	5	4	3	1	1	3	3	3	2	1	1	0	1	1	1	1	0	0	0	4	4
Male	28	25-29 yr	married	Diploma degree	>29,999	Govt	Tertiary	surg	<37 hours	3-5 years	Yes	Yes	No	No	1	0	1	0	0	2	1	1	1	1	1	1	1	2	4	4	1	1	4	4	4	1	3	1	3	0	0	0	0	0	0	0	0	2	5
Male	23	<25 yr	married	Diploma degree	<21,000	Private	Secondary	criti	37-48 hours	>5 years	Yes	Yes	No	No	1	1	1	1	0	1	1	5	5	5	5	5	5	5	7	5	3	1	7	4	4	4	3	1	3	1	1	1	1	0	3	0	0	4	3
Male	24	<25 yr	married	Diploma degree	<21,000	Private	Secondary	criti	37-48 hours	<3 years	No	Yes	No	Yes	0	0	0	0	0	2	1	1	1	1	1	2	1	2	4	3	4	1	1	7	1	7	3	1	3	2	2	2	2	2	1	2	2	5	3
Male	24	<25 yr	unmarried	Bachelor's degree	<21,000	Private	Tertiary	criti	<37 hours	<3 years	Yes	No	No	Yes	0	1	0	0	0	5	4	3	4	4	4	1	3	2	4	4	2	4	5	5	1	5	1	7	1	1	0	1	0	3	0	0	0	1	1
Male	34.8	>29 yr	married	Master's degree or above	>29,999	Govt	Tertiary	surg	<37 hours	>5 years	No	Yes	Yes	No	1	1	0	0	0	2	2	2	2	2	2	2	2	2	2	2	2	1	1	2	2	2	2	2	0	0	0	0	0	0	0	0	0	3	2
Male	23.7	<25 yr	unmarried	Bachelor's degree	<21,000	Private	Primary	general	<37 hours	<3 years	Yes	No	Yes	Yes	1	1	2	2	2	3	3	3	3	3	4	4	3	3	3	4	3	4	4	4	4	5	4	2	1	2	2	2	0	0	1	2	2	3	3
Male	25	25-29 yr	unmarried	Diploma degree	<21,000	Private	Secondary	em	>48 hours	<3 years	Yes	Yes	No	Yes	0	3	1	2	3	1	1	1	1	2	4	2	1	1	4	5	4	4	5	5	3	4	7	4	3	0	3	0	2	1	2	3	0	5	5
Male	34.2	>29 yr	married	Diploma degree	21,000-29,999	Govt	Tertiary	surg	<37 hours	>5 years	Yes	Yes	Yes	No	0	2	0	0	0	2	1	2	2	1	2	2	4	2	4	4	4	5	5	5	3	2	2	3	2	1	0	1	0	0	0	1	1	4	4
Male	36	>29 yr	married	Master's degree or above	21,000-29,999	Govt	Tertiary	em	37-48 hours	>5 years	No	Yes	No	No	1	3	0	0	0	5	4	2	2	5	3	3	3	4	6	4	2	2	4	4	4	4	4	4	3	2	2	2	3	3	3	2	1	1	4
Male	29	25-29 yr	unmarried	Diploma degree	>29,999	Govt	Tertiary	med	<37 hours	3-5 years	Yes	Yes	No	No	0	1	2	0	0	2	2	2	2	2	2	2	2	2	5	5	4	1	2	4	3	3	3	3	2	3	2	2	2	1	1	1	1	5	5
Male	30	>29 yr	unmarried	Master's degree or above	>29,999	Govt	Secondary	em	>48 hours	3-5 years	No	Yes	No	Yes	1	0	1	0	0	2	2	2	2	2	1	2	1	2	4	3	3	1	3	6	4	3	4	4	0	1	1	1	1	1	1	1	1	1	2
Male	31	>29 yr	unmarried	Diploma degree	21,000-29,999	Govt	Tertiary	med	<37 hours	>5 years	No	Yes	No	No	0	0	0	0	0	1	1	1	2	2	2	2	2	2	1	1	1	1	1	1	1	1	1	1	3	0	0	0	0	0	0	0	0	4	4
Male	27.4	25-29 yr	married	Master's degree or above	>29,999	Govt	Tertiary	surg	<37 hours	3-5 years	No	Yes	Yes	No	2	3	2	0	0	3	4	1	2	2	3	2	4	4	3	5	4	1	4	2	1	3	4	1	1	1	2	1	2	2	1	0	2	3	3
Male	24.3	<25 yr	unmarried	Diploma degree	21,000-29,999	Private	Tertiary	criti	37-48 hours	3-5 years	Yes	Yes	Yes	No	0	2	0	0	0	2	2	2	2	2	2	3	2	2	4	4	5	6	4	4	4	3	4	4	1	1	2	3	2	1	0	1	0	4	4
Male	27	25-29 yr	unmarried	Bachelor's degree	<21,000	Private	Tertiary	surg	37-48 hours	<3 years	No	Yes	No	No	0	1	0	0	0	1	2	1	2	2	2	1	2	1	2	2	1	2	2	1	1	1	1	1	0	0	0	0	0	0	0	0	0	4	5
Male	22.9	<25 yr	married	Bachelor's degree	<21,000	Private	Tertiary	med	37-48 hours	<3 years	Yes	Yes	No	No	0	2	0	1	0	1	2	3	2	2	1	1	1	2	3	1	1	1	1	1	1	1	1	1	2	0	0	0	2	0	0	0	0	3	3
Male	23.2	<25 yr	unmarried	Diploma degree	>29,999	Private	Secondary	criti	>48 hours	<3 years	Yes	Yes	Yes	Yes	0	0	0	0	0	1	1	1	1	1	2	2	5	2	1	3	3	1	2	4	1	1	1	1	3	0	0	0	0	0	0	0	0	5	5
Male	25	25-29 yr	unmarried	Bachelor's degree	>29,999	Private	Primary	criti	37-48 hours	<3 years	Yes	Yes	No	Yes	0	3	1	0	0	4	3	3	4	3	3	2	4	4	5	4	2	1	3	4	5	4	4	4	2	2	3	2	3	3	2	3	2	4	5
Male	28	25-29 yr	unmarried	Bachelor's degree	<21,000	Private	Tertiary	criti	>48 hours	3-5 years	Yes	No	No	No	0	1	2	0	0	2	3	5	4	4	5	4	3	2	7	7	6	3	6	6	6	6	6	6	1	1	2	3	2	2	2	2	1	4	2
Male	25	25-29 yr	unmarried	Diploma degree	<21,000	Private	Primary	criti	>48 hours	<3 years	Yes	No	No	No	1	1	0	0	0	2	1	2	1	4	2	1	2	2	4	4	4	1	1	4	1	1	1	1	3	2	0	0	0	0	1	1	0	3	3
Male	31.2	>29 yr	married	Master's degree or above	21,000-29,999	Govt	Primary	med	<37 hours	<3 years	Yes	Yes	No	No	0	0	0	0	1	2	2	3	3	3	4	3	3	3	5	4	5	4	4	5	5	3	3	4	1	1	2	2	1	1	1	2	1	4	4
Male	28.3	25-29 yr	unmarried	Bachelor's degree	21,000-29,999	Govt	Secondary	criti	37-48 hours	>5 years	No	Yes	No	No	0	0	0	0	0	2	1	2	1	1	2	2	1	1	5	4	4	1	3	4	4	3	4	1	3	1	1	1	1	0	0	0	0	4	4
Male	27	25-29 yr	married	Diploma degree	21,000-29,999	Private	Tertiary	med	>48 hours	>5 years	Yes	Yes	No	Yes	0	0	0	0	1	1	1	3	1	1	1	1	1	1	1	2	2	1	1	1	1	2	2	2	3	3	3	3	3	3	3	3	3	5	5
Male	31	>29 yr	married	Master's degree or above	21,000-29,999	Govt	Tertiary	surg	<37 hours	3-5 years	No	Yes	No	No	0	1	1	0	0	2	1	3	1	1	1	1	2	1	6	2	1	1	1	1	4	1	6	1	2	0	1	1	2	2	1	0	0	4	4
Male	29	25-29 yr	married	Bachelor's degree	<21,000	Private	Tertiary	surg	37-48 hours	3-5 years	No	Yes	No	No	1	3	0	0	0	1	1	1	2	2	2	1	1	1	7	1	1	1	1	2	1	1	4	1	3	0	2	0	3	0	3	0	0	3	3
Male	31.4	>29 yr	married	Master's degree or above	21,000-29,999	Govt	Tertiary	surg	<37 hours	>5 years	No	Yes	No	No	0	0	0	0	0	2	2	3	1	2	1	3	2	1	3	2	6	5	5	5	3	4	4	1	3	1	1	0	0	0	0	2	0	2	2
Male	24	<25 yr	unmarried	Diploma degree	<21,000	Private	Tertiary	med	37-48 hours	<3 years	Yes	Yes	No	No	0	0	0	0	0	1	1	1	1	1	1	1	1	1	1	1	1	1	1	1	1	1	1	1	0	0	0	0	0	0	0	0	0	1	5
Male	26	25-29 yr	married	Bachelor's degree	>29,999	Private	Tertiary	em	37-48 hours	3-5 years	Yes	Yes	No	Yes	0	2	1	0	0	2	2	2	2	2	2	2	2	2	4	7	7	3	4	7	4	3	7	4	2	2	3	3	3	3	3	1	0	5	5
Male	25	25-29 yr	unmarried	Diploma degree	>29,999	Govt	Tertiary	criti	37-48 hours	3-5 years	Yes	Yes	Yes	Yes	0	3	0	0	0	1	1	1	1	1	1	1	1	1	4	1	4	1	1	1	2	1	1	1	3	0	0	0	0	0	0	0	0	5	5
Male	30	>29 yr	married	Diploma degree	>29,999	Govt	Tertiary	med	<37 hours	>5 years	Yes	Yes	No	No	0	0	0	0	0	2	3	1	1	1	1	5	1	1	3	1	2	1	1	2	2	1	1	3	3	1	1	1	0	2	0	1	0	3	3
Male	22	<25 yr	unmarried	Diploma degree	<21,000	Private	Tertiary	surg	<37 hours	<3 years	Yes	Yes	No	No	0	0	0	0	0	1	1	1	1	1	1	1	1	1	1	2	2	1	2	2	1	1	1	1	0	0	0	0	0	0	0	0	0	4	5
Male	25.8	25-29 yr	unmarried	Diploma degree	21,000-29,999	Private	Secondary	criti	37-48 hours	3-5 years	No	Yes	No	No	0	0	0	0	0	1	1	2	2	3	1	1	3	1	2	1	1	1	1	1	2	2	3	1	1	0	1	0	0	1	0	2	0	5	4
Male	26	25-29 yr	unmarried	Bachelor's degree	<21,000	Private	Tertiary	med	<37 hours	>5 years	Yes	Yes	No	No	0	2	1	0	0	4	2	3	2	1
Male	26.6	25-29 yr	unmarried	Bachelor's degree	<21,000	Private	Tertiary	criti	<37 hours	<3 years	Yes	Yes	No	No	0	1	0	0	0	1	1	2	2	2	1	2	1	2	2	1	2	1	1	2	1	2	1	1	1	2	2	2	3	0	1	2	0	2	1
Male	25.4	25-29 yr	unmarried	Bachelor's degree	>29,999	Private	Primary	criti	37-48 hours	<3 years	Yes	Yes	No	No	1	2	1	0	0	2	2	2	2	5	5	2	2	2	4	4	4	4	4	5	4	5	6	6	2	2	2	2	1	3	3	3	3	3	3
Male	26.2	25-29 yr	unmarried	Master's degree or above	<21,000	Private	Tertiary	surg	37-48 hours	<3 years	No	No	No	No	0	2	0	0	0	2	2	2	2	2	3	3	2	2	7	5	5	4	4	5	4	3	6	5	1	2	2	2	1	2	2	1	1	3	3
Male	29	25-29 yr	married	Master's degree or above	>29,999	Govt	Tertiary	surg	>48 hours	3-5 years	No	Yes	Yes	Yes	1	2	2	0	0	2	2	2	2	2	2	2	5	5	3	4	5	4	1	5	4	3	5	2	3	3	3	2	2	0	0	3	3	5	5
Male	24.5	<25 yr	unmarried	Diploma degree	<21,000	Private	Primary	criti	37-48 hours	<3 years	No	No	No	No	0	1	0	0	0	1	1	1	1	1	1	1	2	2	6	5	7	4	4	7	3	5	3	5	1	3	2	2	3	3	3	2	2	2	2
Male	29.4	25-29 yr	married	Bachelor's degree	21,000-29,999	Govt	Tertiary	surg	<37 hours	3-5 years	No	Yes	Yes	No	1	1	1	1	0	2	2	2	2	2	2	2	2	2	1	2	2	1	1	2	1	2	2	2	1	1	1	0	1	1	1	0	0	2	3
Male	56.5	>29 yr	married	Diploma degree	>29,999	Govt	Tertiary	surg	<37 hours	>5 years	Yes	Yes	Yes	No	2	3	1	0	0	2	2	1	2	2	2	2	2	1	2	3	2	2	1	2	1	1	2	1	3	1	0	0	1	1	0	0	0	5	5
Male	26	25-29 yr	unmarried	Bachelor's degree	<21,000	Private	Tertiary	surg	<37 hours	3-5 years	Yes	Yes	No	No	1	1	1	0	0	2	2	2	2	2	1	1	2	1	4	4	4	2	1	3	3	2	4	2	1	1	1	0	0	0	0	0	0	3	3
Male	32	>29 yr	married	Master's degree or above	>29,999	Govt	Tertiary	criti	37-48 hours	>5 years	No	Yes	No	No	0	2	1	0	0	2	3	2	4	2	4	2	2	1	2	4	4	2	2	4	3	2	4	3	3	0	0	1	0	1	0	0	1	3	4
Male	24.5	<25 yr	unmarried	Diploma degree	21,000-29,999	Govt	Tertiary	criti	<37 hours	<3 years	Yes	Yes	No	Yes	0	0	0	0	0	1	1	1	1	1	2	1	1	1	4	2	1	1	2	1	1	1	4	1	1	0	0	1	0	0	0	0	0	4	4
Male	28	25-29 yr	married	Bachelor's degree	>29,999	Govt	Tertiary	criti	>48 hours	>5 years	No	Yes	No	No	2	3	3	3	0	4	3	4	3	2	1	1	1	1	3	3	3	1	5	3	3	2	6	2	1	1	1	1	1	1	1	1	1	2	2
Male	27	25-29 yr	married	Diploma degree	21,000-29,999	Govt	Secondary	surg	37-48 hours	>5 years	No	Yes	No	No	0	3	0	0	0	2	1	2	2	1	2	2	2	1	3	3	4	1	3	2	3	2	5	1	3	1	2	1	0	1	1	1	0	4	4
Male	23	<25 yr	unmarried	Diploma degree	<21,000	Private	Tertiary	med	<37 hours	<3 years	No	Yes	No	No	0	1	0	0	0	2	1	2	1	2	2	1	5	1	4	3	2	2	1	3	3	1	1	1	3	1	0	1	1	0	0	0	0	4	4
Male	28	25-29 yr	married	Diploma degree	>29,999	Govt	Tertiary	surg	37-48 hours	>5 years	Yes	Yes	No	No	0	0	0	0	0	1	2	2	2	1	1	1	2	2	1	1	1	1	1	1	1	1	1	1	3	0	0	0	0	0	0	0	0	5	5
Male	38.2	>29 yr	married	Master's degree or above	21,000-29,999	Govt	Tertiary	criti	37-48 hours	>5 years	No	Yes	No	Yes	0	3	2	0	0	5	1	2	2	2	2	2	2	1	4	4	3	1	3	3	3	1	2	1	3	0	0	0	0	0	0	0	0	4	4
Male	32.3	>29 yr	married	Master's degree or above	>29,999	Govt	Secondary	general	>48 hours	>5 years	Yes	Yes	No	No	0	2	1	0	0	1	1	2	2	1	2	2	2	1	4	2	4	3	4	3	1	1	3	2	1	1	1	1	2	1	3	0	0	2	5
Male	30.7	>29 yr	unmarried	Bachelor's degree	21,000-29,999	Govt	Tertiary	em	<37 hours	3-5 years	No	No	No	No	1	2	0	0	0	1	2	2	1	2	2	1	2	1	4	3	2	4	3	3	3	3	4	1	3	1	1	1	0	0	0	0	0	4	5
Male	24	<25 yr	unmarried	Diploma degree	21,000-29,999	Private	Secondary	criti	37-48 hours	3-5 years	Yes	Yes	Yes	No	1	3	1	0	0	2	2	2	2	2	2	2	4	2	4	2	2	3	2	4	3	3	3	2	1	1	0	1	1	1	1	1	1	3	3
Male	40	>29 yr	married	Diploma degree	>29,999	Govt	Tertiary	general	<37 hours	>5 years	No	Yes	No	No	1	1	1	0	0	3	3	3	3	4	1	1	1	1	5	5	5	1	2	3	3	3	4	3	2	2	2	1	1	0	0	0	0	4	3
Male	23	<25 yr	unmarried	Bachelor's degree	21,000-29,999	Private	Tertiary	med	>48 hours	<3 years	No	No	No	Yes	1	1	1	0	0	2	2	2	2	3	4	3	2	5	6	5	4	3	3	4	4	4	4	4	2	2	2	1	2	1	1	1	0	2	4
Male	25	25-29 yr	married	Bachelor's degree	<21,000	Private	Secondary	criti	37-48 hours	<3 years	No	Yes	No	No	0	1	0	0	0	1	1	1	1	1	1	1	1	1	3	1	1	1	1	1	1	1	1	1	3	0	0	0	0	0	0	0	0	4	4
Male	24.4	<25 yr	married	Bachelor's degree	21,000-29,999	Govt	Secondary	general	37-48 hours	<3 years	No	Yes	No	No	0	3	0	0	0	1	1	1	2	2	1	1	1	1	4	4	4	1	5	5	2	1	4	3	1	1	1	1	0	3	2	0	0	2	3
Male	24.8	<25 yr	unmarried	Diploma degree	>29,999	Govt	Tertiary	criti	<37 hours	3-5 years	Yes	Yes	No	No	0	0	0	0	0	2	3	1	1	4	2	2	3	2	1	1	1	1	1	1	4	1	4	1	3	1	3	3	3	0	0	0	0	4	5
Male	25.2	25-29 yr	unmarried	Diploma degree		Private	Tertiary	criti	37-48 hours	3-5 years	Yes	No	No	Yes	0	1	0	0	0	2	1	1	1	1	3	2	1	1	3	2	3	1	1	2	4	3	4	1	1	0	1	1	1	0	1	1	1	1	2
Male	29	25-29 yr	unmarried	Master's degree or above	21,000-29,999	Govt	Tertiary	general	<37 hours	3-5 years	Yes	Yes	No	No	2	2	2	0	0	3	3	3	2	2	2	1	1	2	6	3	3	1	2	3	4	5	6		2	2	1	1	0	0	0	0	0	4	5
Male	24	<25 yr	unmarried	Bachelor's degree	<21,000	Private	Tertiary	criti	37-48 hours	3-5 years	Yes	Yes	No	Yes	2	3	1	0	0	2	2	1	1	3	1	1	3	5	7	7	2	3	6	5	7	7	7	4	2	2	2	2	3	2	2	2	1	3	3
Male	27.6	25-29 yr	unmarried	Bachelor's degree	21,000-29,999	Private	Tertiary	criti	37-48 hours	3-5 years	No	Yes	No	No	0	0	0	0	0	1	1	2	1	1	2	1	1	2	3	4	1	1	1	1	1	1	3	3	3	0	0	0	0	0	0	0	0	4	4
Male	26	25-29 yr	unmarried	Bachelor's degree	21,000-29,999	Private	Tertiary	med	37-48 hours	<3 years	Yes	Yes	Yes	Yes	0	1	0	0	0	2	2	1	1	3	4	1	2	3	4	3	2	4	2	3	4	2	3	2	2	1	2	2	2	2	1	2	0	4	4
Male	28	25-29 yr	married	Diploma degree	21,000-29,999	Govt	Tertiary	surg	37-48 hours	>5 years	No	Yes	No	No	0	2	2	0	0	2	2	1	2	1	1	2	1	1	3	3	3	1	1	4	3	1	5	3	3	1	0	0	1	0	0	1	0	4	4
Male	41.4	>29 yr	married	Master's degree or above	>29,999	Govt	Tertiary	surg	<37 hours	>5 years	No	Yes	Yes	Yes	2	2	2	1	0	3	3	3	3	2	2	2	2	2	1	1	1	1	1	1	1	1	1	1	3	0	0	0	0	0	0	0	0	4	4
Male	36	>29 yr	married	Master's degree or above	>29,999	Govt	Primary	general	37-48 hours	>5 years	No	Yes	No	No	1	3	3	0	0	1	1	1	1	1	1	1	2	1	3	3	2	1	3	3	1	1	4	3	2	0	0	0	0	0	0	0	0	5	5
Male	29	25-29 yr	married	Master's degree or above	>29,999	Govt	Tertiary	surg	37-48 hours	>5 years	No	Yes	No	No	0	3	3	0	0	3	4	3	4	3	4	5	3	3	6	4	6	1	4	6	1	1	1	3	2	1	0	1	2	0	1	1	1	4	4
Male	23	<25 yr	unmarried	Diploma degree	<21,000	Private	Primary	em	>48 hours	<3 years	Yes	No	No	No	0	0	0	0	0	1	1	1	1	1	1	1	1	1	1	1	1	1	1	1	4	2	3	1	3	0	0	0	0	0	0	0	0	4	4
Male	43	>29 yr	married	Bachelor's degree	>29,999	Govt	Tertiary	em	37-48 hours	>5 years	No	Yes	No	No	3	3	3	1	0	4	2	2	4	4	2	2	2	2	7	5	3	4	5	4	4	6	6	4	2	3	2	0	0	0	1	0	0	5	3
Male	23	<25 yr	unmarried	Diploma degree	<21,000	Private	Tertiary	criti	<37 hours	<3 years	Yes	No	No	No	0	1	0	0	0	1	1	5	2	1	2	2	1	1	5	2	2	1	5	2	1	4	7	7	0	0	0	3	0	0	3	0	0	5	5
Male	30	>29 yr	married	Master's degree or above	>29,999	Private	Secondary	general	>48 hours	3-5 years	Yes	Yes	Yes	Yes	1	2	2	2	2	4	4	3	3	4	3	4	4	4	6	5	4	4	4	6	5	5	5	5	0	1	1	0	1	1	1	1	1	2	2
Male	26	25-29 yr	married	Bachelor's degree	<21,000	Private	Tertiary	criti	37-48 hours	3-5 years	No	No	No	No	0	3	0	0	0	3	5	2	2	1	2	1	5	2	4	4	7	1	7	7	7	7	4	7	1	3	3	0	0	3	3	3	3	1	1
Male	28.6	25-29 yr	married	Diploma degree	21,000-29,999	Govt	Tertiary	surg	<37 hours	3-5 years	No	Yes	Yes	No	1	1	1	0	0	2	2	2	2	2	2	2	2	2	1	1	1	1	1	1	1	1	1	1	2	0	0	0	0	1	1	0	0	4	4
Male	25	25-29 yr	unmarried	Diploma degree	21,000-29,999	Govt	Tertiary	em	<37 hours	3-5 years	No	No	No	Yes	2	0	0	0	0	1	2	1	2	1	1	1	2	5	5	4	3	1	1	1	2	1	5	1	3	0	1	0	0	0	0	0	0	5	5
Male	26.9	25-29 yr	married	Master's degree or above	21,000-29,999	Govt	Secondary	em	<37 hours	<3 years	Yes	Yes	No	No	0	0	1	0	0	1	2	2	1	2	1	1	2	2	3	3	3	1	1	3	3	2	2	2	3	0	0	0	0	0	0	0	0	4	4
Male	22	<25 yr	unmarried	Diploma degree	<21,000	Private	Tertiary	general	37-48 hours	<3 years	Yes	Yes	No	No	0	2	2	0	0	1	1	5	1	1	1	5	1	1	1	1	1	1	1	1	3	1	7	4	1	3	3	3	1	3	0	0	0	2	1
Male	22	<25 yr	unmarried	Bachelor's degree	<21,000	Private	Tertiary	med	<37 hours	3-5 years	Yes	Yes	Yes	No	1	1	0	1	0	2	2	2	1	2	2	2	2	2	5	3	3	3	3	2	3	3	3	2	1	2	2	1	1	1	1	2	1	2	3
Male	27.5	25-29 yr	unmarried	Bachelor's degree	>29,999	Govt	Tertiary	surg	<37 hours	3-5 years	Yes	Yes	Yes	Yes	0	0	0	0	0	2	1	1	1	1	1	1	1	1	1	1	1	1	1	1	1	1	1	1	1	1	2	1	1	1	1	1	1	4	4
Male	50	>29 yr	married	Bachelor's degree	>29,999	Govt	Primary	general	37-48 hours	>5 years	No	Yes	No	No	0	0	0	0	0	1	2	2	2	1	1	2	1	1	5	4	5	4	7	5	1	7	3	4	3	3	1	0	3	3	0	0	0	5	5
Male	25	25-29 yr	unmarried	Master's degree or above	<21,000	Private	Tertiary	surg	37-48 hours	3-5 years	Yes	Yes	No	No	0	3	0	0	0	1	1	2	1	2	1	1	1	2	7	7	7	7	7	7	1	7	1	7	3	0	0	0	0	0	0	0	0	3	3
Male	23	<25 yr	unmarried	Bachelor's degree	<21,000	Govt	Tertiary	med	37-48 hours	>5 years	Yes	Yes	Yes	Yes	0	1	0	0	0	2	1	1	2	1	1	1	1	1	3	4	4	1	1	3	3	4	3	3	1	1	0	1	0	0	0	0	0	1	1
Male	24	<25 yr	unmarried	Bachelor's degree	<21,000	Private	Tertiary	criti	37-48 hours	<3 years	Yes	Yes	No	No	1	1	1	0	0	2	2	2	2	2	2	1	2	1	3	2	2	2	1	3	2	2	2	2	0	0	0	1	0	1	0	0	1	4	4
Male	28	25-29 yr	married	Bachelor's degree	21,000-29,999	Govt	Tertiary	criti	37-48 hours	3-5 years	Yes	Yes	No	No	2	3	2	0	0	2	2	2	2	2	2	1	2	2	4	5	5	2	6	5	3	3	4	1	3	2	2	2	2	2	3	0	2	3	5
Male	26	25-29 yr	unmarried	Bachelor's degree	21,000-29,999	Private	Tertiary	med	37-48 hours	<3 years	Yes	Yes	No	No	0	1	1	0	0	2	1	2	2	2	2	3	1	1	5	4	4	3	3	2	1	3	3	7	2	1	2	1	1	1	1	1	0	4	4
Male	24.3	<25 yr	unmarried	Diploma degree	>29,999	Private	Primary	med	37-48 hours	<3 years	Yes	Yes	Yes	Yes	0	0	0	0	0	2	1	1	1	2	1	1	1	1	4	1	1	1	1	3	3	1	4	1	3	0	0	1	3	1	0	0	0	5	5
Male	27	25-29 yr	married	Bachelor's degree	21,000-29,999	Govt	Secondary	criti	<37 hours	<3 years	Yes	Yes	No	Yes	0	0	0	0	0	2	1	2	1	1	1	1	1	1	3	1	1	1	1	2	3	1	4	1	3	0	0	0	1	1	0	0	0	4	5
Male	27.2	25-29 yr	married	Bachelor's degree	>29,999	Govt	Tertiary	surg	37-48 hours	3-5 years	No	Yes	No	No	0	2	2	0	0	3	2	2	2	3	3	3	3	3	4	4	4	3	4	4	3	4	4	4	0	2	1	2	2	2	1	0	0	2	2
Male	34.8	>29 yr	married	Master's degree or above	>29,999	Govt	Tertiary	surg	37-48 hours	>5 years	No	Yes	Yes	Yes	0	0	0	0	0	2	2	2	2	3	2	2	2	2	2	1	1	1	1	2	1	1	2	2	2	1	1	1	0	0	1	0	0	3	2
Male	27.3	25-29 yr	unmarried	Master's degree or above	<21,000	Private	Tertiary	surg	37-48 hours	3-5 years	Yes	Yes	No	No	0	0	0	0	0	1	1	1	1	1	1	1	1	1	4	4	3	1	1	4	3	1	4	4	3	1	1	1	1	2	0	0	0	1	4
Male	25	25-29 yr	unmarried	Diploma degree	21,000-29,999	Govt	Tertiary	criti	<37 hours	<3 years	No	Yes	No	No	1	1	1	0	0	2	1	1	1	1	2	2	2	1	5	2	3	2	4	3	1	1	4	2	3	0	0	0	0	0	0	0	0	1	5
Male	24.6	<25 yr	unmarried	Bachelor's degree	<21,000	Private	Tertiary	general	<37 hours	<3 years	No	No	No	No	1	2	3	0	0	2	4	2	2	4	5	2	2	3	6	5	5	4	7	6	3	3	5	4	2	3	2	2	0	3	3	2	2	2	3
Male	30.2	>29 yr	married	Diploma degree	21,000-29,999	Govt	Secondary	surg	>48 hours	>5 years	No	Yes	No	No	1	0	0	0	0	5	1	1	2	2	2	1	1	2	3	4	5	4	5	5	3	3	4	7	0	0	0	0	0	1	0	0	0	1	1
Male	25.8	25-29 yr	unmarried	Bachelor's degree	21,000-29,999	Govt	Primary	general	<37 hours	3-5 years	No	Yes	No	No	1	1	0	0	0	1	1	1	1	1	1	1	1	1	1	1	1	1	1	1	1	1	1	1	2	0	0	0	1	0	0	0	0	5	5
Male	30	>29 yr	married	Master's degree or above	>29,999	Govt	Tertiary	criti	<37 hours	>5 years	No	Yes	No	No	1	1	0	0	0	2	2	2	2	2	2	2	2	2	5	3	4	2	2	2	4	2	3	3	1	1	2	2	1	1	1	1	1	2	4
Male	24	<25 yr	unmarried	Diploma degree	<21,000	Private	Tertiary	med	<37 hours	<3 years	Yes	Yes	No	No	0	0	0	0	0	1	1	1	1	1	1	2	1	1	7	2	1	1	1	2	3	1	2	1	3	2	2	2	1	2	2	2	0	4	5
Male	28.5	25-29 yr	unmarried	Bachelor's degree	21,000-29,999	Govt	Tertiary	med	37-48 hours	3-5 years	No	Yes	No	No	0	2	0	0	0	2	2	1	2	2	2	2	2	2	4	2	1	1	6	3	1	4	3	2	2	0	1	2	2	0	0	2	0	3	2
Male	27.2	25-29 yr	married	Bachelor's degree	21,000-29,999	Govt	Secondary	em	37-48 hours	3-5 years	Yes	Yes	Yes	Yes	0	3	3	0	0	2	2	2	1	2	1	1	1	1	3	4	2	1	3	2	2	1	3	2	3	1	1	1	0	0	1	1	0	2	3
Male	30.4	>29 yr	married	Master's degree or above	>29,999	Govt	Secondary	criti	<37 hours	>5 years	No	No	No	Yes	0	0	0	0	0	5	2	2	2	2	2	5	5	2	3	4	4	3	5	5	3	1	2	1	3	3	0	0	0	3	0	0	0	5	5
Male	30	>29 yr	married	Bachelor's degree	21,000-29,999	Govt	Tertiary	surg	37-48 hours	3-5 years	Yes	Yes	No	No	0	0	0	0	0	1	1	1	1	1	1	2	1	1	3	4	4	1	2	5	2	2	2	3	1	0	0	0	0	1	0	1	0	3	3
Male	25.2	25-29 yr	married	Diploma degree	21,000-29,999	Govt	Tertiary	surg	<37 hours	<3 years	No	Yes	No	No	0	3	3	0	0	2	3	5	4	5	5	5	4	3	7	7	7	4	7	7	5	4	4	3	2	2	2	3	2	3	2	2	2	4	4
Male	23	<25 yr	married	Bachelor's degree	<21,000	Private	Tertiary	general	37-48 hours	<3 years	No	No	No	No	0	1	1	0	0	2	5	2	5	5	2	4	5	3	5	6	5	4	4	4	4	3	2	1	1	1	0	1	0	0	1	0	0	1	3
Male	24	<25 yr	unmarried	Diploma degree	<21,000	Private	Primary	em	37-48 hours	<3 years	Yes	Yes	No	No	1	0	1	0	0	2	2	2	5	3	4	2	1	3	4	2	3	1	2	3	3	2	2	3	3	1	3	3	0	1	3	0	0	4	4
Male	27.4	25-29 yr	married	Bachelor's degree	21,000-29,999	Govt	Tertiary	surg	37-48 hours	<3 years	Yes	Yes	No	No	0	1	1	0	0	2	2	2	2	2	2	2	2	1	4	4	4	1	2	4	4	3	4	4	2	2	2	2	1	2	2	1	1	4	2
Male	25	25-29 yr	unmarried	Bachelor's degree	<21,000	Private	Tertiary	criti	<37 hours	<3 years	Yes	Yes	No	Yes	0	3	2	0	0	2	2	2	4	2	4	2	2	3	4	3	3	1	4	4	3	3	6	3	2	1	1	1	1	3	0	2	2	2	3
Male	31.2	>29 yr	married	Master's degree or above	>29,999	Govt	Tertiary	surg	<37 hours	>5 years	No	Yes	No	No	1	2	3	1	0	2	4	3	3	3	5	3	4	2	5	6	5	5	5	5	3	6	6	4	2	2	2	1	1	2	1	1	2	2	3
Male	28	25-29 yr	unmarried	Bachelor's degree	21,000-29,999	Govt	Tertiary	surg	<37 hours	3-5 years	No	Yes	No	No	0	0	0	0	0	1	1	1	1	2	2	1	2	2	1	2	1	1	1	1	1	2	1	2	2	0	0	0	0	0	0	0	0	4	2
Male	22	<25 yr	unmarried	Diploma degree	<21,000	Private	Tertiary	criti	37-48 hours	<3 years	Yes	Yes	Yes	No	1	2	1	0	1	3	2	2	2	2	1	2	2	3	2	2	3	1	2	2	1	2	5	2	2	1	2	1	2	2	1	1	1	4	4
Male	25.2	25-29 yr	unmarried	Diploma degree	21,000-29,999	Govt	Tertiary	criti	37-48 hours	3-5 years	No	Yes	No	No	0	0	0	0	0	1	1	1	1	1	3	1	1	1	2	2	1	1	1	2	2	1	7	7	1	0	0	0	0	0	3	0	0	4	4
Male	28	25-29 yr	married	Diploma degree	<21,000	Private	Tertiary	med	<37 hours	3-5 years	No	Yes	No	No	2	1	1	0	0	1	1	1	1	1	1	1	1	1	1	1	1	1	1	1	2	1	1	1	0	0	0	0	0	0	0	0	0	1	1
Male	28	25-29 yr	unmarried	Bachelor's degree	<21,000	Private	Tertiary	surg	<37 hours	3-5 years	Yes	Yes	No	Yes	0	0	0	0	0	1	1	1	1	1	2	1	2	1	2	2	1	1	1	1	2	1	2	1	1	0	1	1	1	1	1	1	0	3	3
Male	27	25-29 yr	unmarried	Master's degree or above	<21,000	Private	Tertiary	med	<37 hours	3-5 years	No	Yes	No	No	0	2	2	0	0	1	2	4	2	5	4	4	3	4	7	7	7	6	6	7	6	7	7	7	2	2	3	3	2	2	2	2	3	4	4
Male	31	>29 yr	unmarried	Bachelor's degree	21,000-29,999	Govt	Tertiary	med	37-48 hours	>5 years	No	Yes	No	Yes	0	0	0	0	0	2	2	2	2	2	2	2	2	2	7	2	3	3	3	2	2	3	3	3	2	0	0	1	2	1	1	1	1	5	5
Male	25	25-29 yr	married	Diploma degree	<21,000	Private	Secondary	criti	37-48 hours	<3 years	Yes	Yes	Yes	No	0	0	0	0	0	1	1	1	1	1	1	1	1	1	1	1	1	1	1	1	1	1	3	1	2	1	0	0	0	0	0	0	0	5	5
Male	32	>29 yr	married	Bachelor's degree	21,000-29,999	Govt	Tertiary	surg	<37 hours	>5 years	Yes	Yes	Yes	No	0	2	0	0	0	2	2	1	2	2	3	2	4	2	2	2	2	2	2	2	2	2	2	2	2	1	1	1	2	1	1	1	1	4	4
Male	27	25-29 yr	married	Bachelor's degree	21,000-29,999	Private	Secondary	med	<37 hours	3-5 years	Yes	Yes	No	Yes	0	0	0	0	0	1	1	1	1	1	1	1	1	1	3	3	1	1	1	1	1	1	3	1	3	1	1	0	1	0	0	0	0	3	3
Male	27	25-29 yr	married	Master's degree or above	21,000-29,999	Govt	Tertiary	em	<37 hours	>5 years	Yes	No	No	No	2	2	1	0	0	2	1	1	2	1	1	1	1	2	5	3	3	3	1	2	1	2	5	4	0	1	1	3	2	0	0	1	0	3	3
Male	25	25-29 yr	unmarried	Bachelor's degree	21,000-29,999	Govt	Tertiary	surg	<37 hours	3-5 years	Yes	Yes	No	Yes	0	0	1	0	0	1	1	1	1	2	1	2	1	1	3	3	1	1	1	1	1	1	3	1	3	0	0	0	0	0	0	0	0	4	1
Male	28	25-29 yr	married	Master's degree or above	21,000-29,999	Govt	Tertiary	em	<37 hours	3-5 years	No	Yes	No	No	0	0	0	0	0	2	2	2	1	2	2	1	1	1	3	2	4	1	5	6	4	4	5	1	2	1	0	1	1	0	0	0	0	5	4
Male	29	25-29 yr	married	Bachelor's degree	>29,999	Govt	Tertiary	general	>48 hours	3-5 years	No	Yes	No	No	0	0	0	0	0	2	2	2	2	2	2	3	5	2	4	3	3	4	5	4	3	5	3	2	1	1	3	1	3	1	1	0	0	4	5
Male	23	<25 yr	unmarried	Diploma degree	<21,000	Private	Secondary	criti	37-48 hours	<3 years	Yes	Yes	Yes	Yes	0	0	0	0	0	1	1	1	1	2	2	1	1	1	4	1	1	1	1	1	1	1	1	1	3	0	0	0	0	0	0	0	0	5	5
Male	30	>29 yr	married	Master's degree or above	21,000-29,999	Govt	Secondary	med	>48 hours	3-5 years	No	Yes	Yes	No	1	3	3	0	0	1	1	2	2	1	2	2	1	1	3	3	3	3	3	3	3	2	2	2	0	0	0	0	0	0	0	0	0	5	3
Male	25	25-29 yr	unmarried	Master's degree or above	<21,000	Private	Secondary	criti	37-48 hours	<3 years	No	No	No	No	0	1	2	0	0	3	2	1	2	3	2	2	2	2	5	4	3	2	3	6	4	3	3	3	3	2	2	2	3	3	3	2	0	4	4
Male	24	<25 yr	unmarried	Diploma degree	<21,000	Private	Tertiary	general	37-48 hours	<3 years	No	Yes	No	Yes	0	0	0	0	0	2	2	2	2	2	3	2	3	2	3	3	2	4	3	3	1	1	5	2	0	1	2	3	3	1	3	0	0	2	1
Male	22.9	<25 yr	unmarried	Diploma degree		Private	Tertiary	med	>48 hours	<3 years	Yes	Yes	No	Yes	0	0	0	0	0	1	1	1	1	1	1	1	5	1	3	3	1	1	1	1	2	1	2	1	3	0	0	0	1	0	3	1	0	4	4
Male	40	>29 yr	married	Diploma degree	>29,999	Govt	Tertiary	general	<37 hours	>5 years	No	Yes	No	No	1	1	1	0	0	3	3	3	3	3	4	1	1	1	5	5	5	1	2	3	3	3	4	3	2	2	2	1	1	0	0	0	0	4	3
Male	26	25-29 yr	married	Master's degree or above	21,000-29,999	Govt	Tertiary	surg	<37 hours	<3 years	No	Yes	No	No	0	3	1	0	0	2	2	2	2	2	2	2	2	2	4	4	4	4	4	4	4	4	4	4	3	1	0	0	0	0	0	0	0	5	5
Male	26.4	25-29 yr	unmarried	Master's degree or above	21,000-29,999	Private	Tertiary	criti	37-48 hours	<3 years	Yes	Yes	No	No	0	3	3	1	0	2	1	1	1	2	2	2	2	2	4	4	3	2	2	4	3	2	3	5	2	2	2	3	3	2	2	0	0	4	3
Male	24.6	<25 yr	unmarried	Diploma degree	<21,000	Private	Tertiary	criti	37-48 hours	3-5 years	Yes	Yes	No	No	0	0	0	0	0	1	1	1	1	2	1	2	1	1	1	2	1	1	1	1	1	1	7	1	3	0	0	0	1	0	0	0	0	3	3
Male	23	<25 yr	unmarried	Bachelor's degree	<21,000	Private	Primary	surg	37-48 hours	<3 years	Yes	Yes	No	Yes	0	0	0	0	0	2	2	1	1	2	1	1	1	1	4	3	5	3	5	3	4	3	7	1	3	1	3	0	0	0	3	0	0	1	5
Male	25	25-29 yr	married	Bachelor's degree	<21,000	Private	Secondary	surg	37-48 hours	<3 years	No	No	No	No	2	3	3	2	0	2	5	5	5	5	5	5	5	5	6	6	6	4	7	7	4	7	7	4	3	3	3	2	0	3	3	2	2	2	2
Male	30.2	>29 yr	married	Bachelor's degree	>29,999	Govt	Tertiary	surg	<37 hours	>5 years	No	Yes	Yes	No	0	2	1	0	0	2	2	3	4	2	4	4	4	2	3	3	3	3	3	4	1	3	2	3	1	1	2	0	1	1	0	1	1	3	3
Male	26.2	25-29 yr	unmarried	Diploma degree	21,000-29,999	Govt	Tertiary	surg	<37 hours	3-5 years	No	Yes	No	No	0	1	0	0	0	2	2	1	2	1	4	2	3	2	3	3	4	3	2	3	3	2	2	3	1	1	0	1	1	1	1	2	1	3	3
Male	29	25-29 yr	unmarried	Diploma degree	21,000-29,999	Govt	Tertiary	criti	<37 hours	3-5 years	Yes	Yes	Yes	No	1	1	1	1	2	2	2	1	2	2	2	2	1	2	1	5	5	1	3	4	3	3	3	2	3	0	2	2	2	1	1	1	1	5	5
Male	29.2	25-29 yr	married	Master's degree or above	<21,000	Private	Secondary	general	<37 hours	<3 years	No	Yes	No	No	0	2	0	0	0	1	1	1	2	2	1	1	3	1	4	3	2	1	1	3	4	2	5	4	2	1	3	0	3	1	0	0	0	3	3
Male	28.8	25-29 yr	unmarried	Bachelor's degree	21,000-29,999	Govt	Tertiary	surg	37-48 hours	>5 years	No	Yes	No	No	0	2	1	0	0	1	1	1	2	2	2	2	1	2	4	4	4	1	4	4	1	1	3	1	3	1	1	1	2	0	0	0	0	4	4
Male	28	25-29 yr	married	Master's degree or above	21,000-29,999	Govt	Tertiary	surg	37-48 hours	<3 years	No	Yes	No	No	0	2	1	0	0	5	2	2	2	2	3	2	2	1	4	4	5	3	4	5	3	3	3	5	2	2	0	1	1	3	1	0	2	2	2
Male	23.2	<25 yr	unmarried	Diploma degree	>29,999	Private	Tertiary	criti	<37 hours	<3 years	Yes	Yes	No	No	3	3	1	0	0	2	5	2	1	5	2	1	5	2	3	1	1	1	1	1	1	1	1	1	1	0	0	0	0	0	0	0	0	3	3
Male	30	>29 yr	married	Bachelor's degree	>29,999	Govt	Tertiary	surg	37-48 hours	3-5 years	Yes	Yes	No	No	0	1	0	2	0	1	2	1	1	2	2	5	1	1	3	1	2	2	1	3	2	1	3	1	3	0	0	1	0	2	1	0	0	4	4
Male	45	>29 yr	married	Bachelor's degree	>29,999	Govt	Tertiary	med	<37 hours	>5 years	No	Yes	No	No	1	1	0	0	0	2	2	2	2	2	2	2	2	2	5	3	4	2	2	2	4	2	3	3	1	1	2	2	1	1	1	1	1	2	4
Male	27	25-29 yr	married	Diploma degree	<21,000	Govt	Primary	med	37-48 hours	3-5 years	No	Yes	No	No	0	2	0	0	0	1	1	1	1	1	1	1	1	1	3	1	1	1	1	1	1	1	1	1	3	0	0	0	0	0	0	0	0	5	4
Male	29	25-29 yr	married	Bachelor's degree	21,000-29,999	Govt	Secondary	em	37-48 hours	3-5 years	No	Yes	No	No	3	3	0	0	0	1	1	2	1	5	1	1	1	1	4	4	4	1	4	4	4	1	4	2	3	1	1	1	2	0	0	0	0	5	4
Male	29	25-29 yr	unmarried	Bachelor's degree	21,000-29,999	Govt	Tertiary	med	<37 hours	>5 years	No	Yes	No	No	0	0	0	0	0	2	2	2	2	2	2	2	2	2	3	4	5	2	3	4	1	2	1	2	3	0	0	0	0	0	0	0	0	5	5
Male	29	25-29 yr	unmarried	Diploma degree	21,000-29,999	Govt	Tertiary	surg	<37 hours	3-5 years	No	Yes	No	No	1	1	0	0	0	1	2	2	1	2	2	2	2	1	3	2	3	1	2	4	2	2	2	2	0	0	0	0	0	0	0	1	0	1	4
Male	33	>29 yr	married	Diploma degree	<21,000	Govt	Secondary	em	37-48 hours	>5 years	No	Yes	No	No	0	3	2	0	0	1	1	1	1	2	1	2	1	2	3	3	3	1	3	3	1	3	4	1	3	2	1	1	1	1	0	0	0	4	4
Male	23.3	<25 yr	unmarried	Diploma degree	<21,000	Private	Tertiary	surg	37-48 hours	<3 years	No	Yes	No	No	0	3	1	0	0	2	2	2	2	1	2	1	2	1	6	3	1	1	2	1	2	1	4	1	2	2	0	2	2	2	2	1	0	3	3
Male	40	>29 yr	married	Master's degree or above	21,000-29,999	Govt	Tertiary	general	<37 hours	>5 years	No	Yes	No	No	0	0	0	0	0	2	2	2	2	2	1	2	3	1	4	4	3	3	3	3	3	1	3	3	2	1	0	0	1	0	0	0	0	4	4
Male	26.9	25-29 yr	married	Bachelor's degree	>29,999	Private	Secondary	criti	37-48 hours	<3 years	Yes	Yes	No	No	0	0	0	0	0	1	1	1	1	1	1	1	1	1	3	1	1	1	1	1	3	1	1	1	3	0	0	0	0	0	0	0	0	5	5
Male	25.3	25-29 yr	unmarried	Bachelor's degree	21,000-29,999	Private	Secondary	surg	<37 hours	3-5 years	Yes	Yes	No	Yes	0	1	0	0	0	1	1	1	1	1	1	1	1	1	4	1	3	1	4	1	3	2	1	1	1	0	0	0	0	0	0	0	0	1	4
Male	23	<25 yr	unmarried	Diploma degree	<21,000	Private	Secondary	criti	>48 hours	3-5 years	Yes	Yes	No	No	0	0	0	0	0	2	2	2	2	2	2	1	1	1	4	4	4	1	1	1	1	1	2	1	3	0	2	0	3	3	0	0	0	5	3
Male	27	25-29 yr	unmarried	Diploma degree	21,000-29,999	Govt	Tertiary	criti	<37 hours	>5 years	No	Yes	No	No	0	2	2	1	0	5	2	2	2	5	2	2	2	2	4	5	5	4	4	3	1	3	3	1	3	2	3	3	3	3	1	1	1	4	4
Male	28.9	25-29 yr	married	Bachelor's degree	21,000-29,999	Govt	Secondary	em	<37 hours	3-5 years	No	Yes	No	No	0	0	0	0	0	2	2	1	1	2	2	1	1	1	3	5	7	1	3	4	1	2	3	1	2	1	1	0	2	0	1	1	0	4	4
Male	26	25-29 yr	married	Bachelor's degree	>29,999	Private	Tertiary	em	>48 hours	3-5 years	Yes	Yes	No	No	1	1	1	1	1	2	2	2	2	2	3	2	2	2	2	3	4	4	3	3	3	3	3	3	2	1	2	1	2	2	1	2	1	3	3
Male	23	<25 yr	unmarried	Diploma degree	<21,000	Private	Secondary	med	<37 hours	<3 years	No	No	No	No	0	2	2	0	0	2	5	3	2	2	1	2	2	2	5	4	4	4	4	4	4	4	4	4	2	2	0	1	0	0	1	1	2	1	2
Male	27	25-29 yr	unmarried	Bachelor's degree	21,000-29,999	Govt	Tertiary	surg	<37 hours	3-5 years	Yes	Yes	Yes	Yes	0	0	0	0	0	1	1	1	1	1	1	1	1	1	1	2	1	1	1	1	1	1	1	1	1	0	0	0	0	0	0	0	0	3	3
Male	23.5	<25 yr	unmarried	Diploma degree		Private	Tertiary	med	<37 hours	<3 years	Yes	Yes	No	No	0	0	0	0	0	2	1	1	1	1	1	5	5	1	1	1	1	1	1	7	1	7	1	1	3	3	3	3	0	0	0	0	0	1	1
Male	35.3	>29 yr	married	Master's degree or above	21,000-29,999	Govt	Tertiary	em	<37 hours	>5 years	Yes	Yes	No	No	2	3	3	3	1	2	2	2	2	2	2	2	2	2	4	3	4	3	5	4	3	3	5	4	1	1	1	1	1	3	1	0	0	2	3
Male	29.3	25-29 yr	married	Master's degree or above	21,000-29,999	Govt	Tertiary	surg	<37 hours	>5 years	No	Yes	Yes	No	0	1	0	0	0	2	2	2	1	2	2	2	4	2	3	4	4	4	4	3	3	3	3	3	1	1	2	2	1	1	1	1	1	4	3
Male	26	25-29 yr	unmarried	Master's degree or above	<21,000	Private	Tertiary	surg	37-48 hours	<3 years	No	No	No	No	1	2	1	0	0	2	2	2	1	2	3	2	1	1	5	4	3	1	3	3	4	2	7	2	1	1	3	1	2	0	2	1	0	4	4
Male	32.8	>29 yr	married	Bachelor's degree	>29,999	Govt	Tertiary	surg	<37 hours	>5 years	No	Yes	Yes	No	1	1	1	0	0	2	2	2	2	2	2	2	2	2	1	1	1	1	1	2	1	2	2	2	2	1	1	1	1	1	0	0	0	3	3
Male	23.6	<25 yr	unmarried	Bachelor's degree	<21,000	Private	Secondary	med	37-48 hours	<3 years	No	Yes	Yes	No	1	1	0	1	1	2	1	2	3	1	2	3	3	3	2	2	3	3	2	2	2	3	1	3	1	1	1	1	0	1	1	1	0	1	4
Male	28	25-29 yr	married	Master's degree or above	>29,999	Govt	Tertiary	surg	37-48 hours	>5 years	Yes	Yes	No	No	3	3	1	2	2	4	5	4	5	2	2	3	2	2	4	3	1	3	1	3	1	1	4	1	3	0	1	1	1	1	0	0	1	4	5
Male	26	25-29 yr	married	Master's degree or above	<21,000	Private	Secondary	criti	<37 hours	<3 years	No	No	No	No	0	3	1	0	0	1	1	2	1	1	2	1	3	2	1	2	4	2	4	3	7	5	4	2	3	3	2	2	2	1	2	1	2	1	4
Male	23	<25 yr	unmarried	Bachelor's degree	<21,000	Private	Tertiary	med	37-48 hours	<3 years	Yes	Yes	No	No	2	3	1	0	0	1	2	2	5	4	5	3	4	4	2	3	1	1	4	4	1	1	3	4	1	2	2	2	1	3	3	2	3	2	2
Male	24.5	<25 yr	unmarried	Bachelor's degree	<21,000	Private	Secondary	general	<37 hours	<3 years	No	Yes	No	No	0	0	0	0	0	1	1	1	1	1	1	1	1	1	1	1	1	1	1	1	1	1	1	1	2	0	0	0	0	0	0	0	0	1	1
Male	38	>29 yr	married	Master's degree or above	>29,999	Govt	Tertiary	em	>48 hours	>5 years	No	Yes	No	No	0	3	1	2	2	5	4	3	2	2	3	2	3	4	5	4	4	3	5	4	5	4	3	4	2	3	2	2	2	2	2	2	2	5	5
Male	27	25-29 yr	married	Master's degree or above	21,000-29,999	Govt	Tertiary	em	37-48 hours	3-5 years	Yes	Yes	No	No	0	1	0	2	0	1	2	1	1	2	2	5	1	1	3	1	2	2	1	2	2	1	3	1	3	0	0	1	0	2	1	0	0	4	4
Male	28	25-29 yr	married	Bachelor's degree	<21,000	Private	Secondary	med	<37 hours	3-5 years	No	Yes	No	No	0	3	3	0	0										1	1	1	1	1	1	1	1	1	1	0	0	0	0	0	0	0	0	0
Male	32.5	>29 yr	unmarried	Bachelor's degree	21,000-29,999	Govt	Primary	general	>48 hours	3-5 years	No	Yes	No	Yes	0	2	0	0	0	5	2	1	1	2	1	1	1	1	7	1	2	2	3	4	1	1	3	2	3	0	0	0	1	0	1	0	0	1	3
Male	28	25-29 yr	unmarried	Bachelor's degree	21,000-29,999	Govt	Tertiary	med	<37 hours	3-5 years	Yes	Yes	Yes	No	0	1	0	0	0	2	2	1	1	2	2	1	1	2	4	3	2	1	3	3	1	2	5	1	3	0	2	0	0	0	1	1	0	4	4
Male	29	25-29 yr	married	Bachelor's degree	21,000-29,999	Govt	Secondary	criti	37-48 hours	>5 years	Yes	Yes	No	Yes	0	0	3	0	0	1	1		1	1	1	1	1	1	3	4	1	1	4	2		1	4	1	3	0	0	0	0	0	0	0	0	4	3
Male	25.2	25-29 yr	unmarried	Bachelor's degree	21,000-29,999	Private	Tertiary	criti	<37 hours	3-5 years	Yes	Yes	No	No	0	0	0	0	0	2	2	2	2	5	2	2	2	1	7	7	7	2	6	3	3	5	7	3	2	2	1	3	0	1	3	0	0	3	1
Male	24	<25 yr	unmarried	Diploma degree	>29,999	Private	Primary	med	>48 hours	<3 years	Yes	Yes	Yes	No	0	2	0	2	3	1	5	2	5	1	2	1	2	4	5	4	4	3	1	7	4	4	7	6	2	3	0	3	2	2	2	2	2	4	4
Male	25	25-29 yr	unmarried	Bachelor's degree	21,000-29,999	Govt	Tertiary	criti	<37 hours	<3 years	Yes	Yes	Yes	No	0	0	2	0	0	1	1	1	1	1	1	1	1	1	4	1	1	1	1	1	1	1	1	1	0	0	0	0	0	0	0	0	0	4	5
Male	30	>29 yr	married	Bachelor's degree	21,000-29,999	Govt	Tertiary	em	<37 hours	3-5 years	No	Yes	No	No	0	3	3	0	0	5	5	4	5	4	1	3	3	4	1	7	6	1	5	4	1	1	1	1	3	3	2	0	2	2	3	1	0	2	4
Male	26	25-29 yr	unmarried	Bachelor's degree	<21,000	Private	Tertiary	surg	<37 hours	3-5 years	Yes	Yes	No	No	0	0	0	0	0	2	2	1	2	2	1	2	1	1	2	2	2	1	1	2	2	2	2	2	1	1	2	1	1	1	0	1	0	3	3
Male	45	>29 yr	married	Master's degree or above	21,000-29,999	Private	Secondary	criti	37-48 hours	>5 years	Yes	Yes	No	Yes	0	0	0	0	0	2	1	1	1	1	2	1	2	1	1	1	1	1	1	1	1	1	1	1	3	0	0	0	0	0	0	1	0	5	5
Male	30	>29 yr	unmarried	Diploma degree	>29,999	Govt	Tertiary	criti	37-48 hours	>5 years	No	Yes	No	No	1	0	0	0	0	2	2	2	2	2	2	1	2	2	7	2	3	1	3	3	3	3	4	4	0	2	2	2	1	0	1	1	1	3	3
Male	22	<25 yr	unmarried	Diploma degree	<21,000	Private	Primary	med	>48 hours	<3 years	No	No	No	No	0	1	1	0	0	1	2	1	2	1	4	3	4	4	5	4	4	3	4	4	3	2	3	1	1	1	0	1	1	2	2	1	0	3	3
Male	30	>29 yr	unmarried	Diploma degree	21,000-29,999	Govt	Tertiary	surg	<37 hours	3-5 years	No	Yes	No	No	1	1	0	0	0	1	2	2	1	2	2	2	2	1	2	2	3	1	2	4	2	2	2	3	0	0	0	0	0	0	0	1	0	1	4
Male	27	25-29 yr	married	Master's degree or above	>29,999	Private	Primary	general	<37 hours	3-5 years	Yes	Yes	Yes	No	1	2	2	0	0	1	1	1	1	1	2	1	1	1	3	3	4	1	3	4	3	3	1	1	2	0	0	0	0	0	0	0	0	5	5
Male	32	>29 yr	married	Master's degree or above	>29,999	Govt	Tertiary	med	<37 hours	>5 years	No	Yes	Yes	No	0	0	0	0	0	4	1	1	1	1	4	3	1	1	1	1	1	1	1	1	2	1	7	1	1	0	0	0	0	0	3	3	0	4	4
Male	28	25-29 yr	married	Master's degree or above	>29,999	Govt	Tertiary	med	<37 hours	>5 years	No	Yes	No	No	1	3	3	3	0	2	3	2	3	2	3	2	3	2	4	3	2	4	3	2	5	3	5	4	2	1	2	1	2	2	2	1	1	3	2
Male	29	25-29 yr	married	Bachelor's degree	21,000-29,999	Govt	Primary	med	<37 hours	<3 years	No	No	No	No	0	2	0	0	0	1	2	1	2	2	1	1	2	1	4	3	2	1	1	3	1	1	4	2	1	1	0	0	0	0	0	0	0	4	3
Male	41	>29 yr	married	Master's degree or above	>29,999	Govt	Primary	em	37-48 hours	>5 years	No	Yes	No	No	3	3	3	0	0	3	3	4	2	3	2	3	3	3	3	5	5	4	5	5	3	5	3	1	2	2	2	1	2	3	3	3	3	1	2
Male	27	25-29 yr	married	Bachelor's degree	21,000-29,999	Govt	Tertiary	em	37-48 hours	>5 years	Yes	Yes	Yes	Yes	0	1	1	0	0	2	2	2	2	2	2	2	2	2	3	3	2	2	1	2	1	1	1	1	3	0	0	0	0	0	0	1	0	5	5
Male	26	25-29 yr	unmarried	Bachelor's degree	>29,999	Private	Tertiary	criti	37-48 hours	3-5 years	Yes	Yes	Yes	Yes	1	0	0	0	0	1	1	1	1	1	1	1	1	1	4	1	1	1	1	1	3	1	3	1	3	0	0	0	0	0	0	0	0	5	2
Male	24.7	<25 yr	unmarried	Diploma degree	21,000-29,999	Govt	Tertiary	surg	<37 hours	<3 years	No	Yes	No	No	0	1	2	1	0	5	5	5	5	5	5	3	5	3	3	3	3	3	5	5	2	6	7	4	3	3	3	3	3	3	3	3	3	2	4
Male	23.8	<25 yr	unmarried	Diploma degree	<21,000	Private	Tertiary	em	>48 hours	<3 years	Yes	Yes	No	Yes	0	3	0	0	0	2	2	1	1	1	1	1	1	1	4	2	1	1	2	1	3	1	4	1	2	1	1	1	0	0	0	0	0	4	4
Male	27.3	25-29 yr	unmarried	Diploma degree	>29,999	Govt	Secondary	criti	37-48 hours	3-5 years	No	No	No	No	3	3	3	3	1	5	5	5	5	3	2	1	3	3	3	3	3	6	3	4	3	3	4	2	3	1	3	1	1	3	2	0	0	5	5
Male	25	25-29 yr	unmarried	Diploma degree	21,000-29,999	Govt	Tertiary	criti	37-48 hours	3-5 years	No	Yes	No	Yes	0	0	0	0	0	1	1	1	1	1	3	1	1	1	2	2	1	1	1	2	2	1	7	7	1	0	0	0	0	0	3	0	0	4	4
Male	26	25-29 yr	unmarried	Bachelor's degree	<21,000	Private	Secondary	med	37-48 hours	<3 years	Yes	Yes	No	No	0	0	0	0	0	5	5	5	5	5	5	5	5	1	2	1	1	1	1	1	3	3	1	1	3	0	0	0	1	0	0	0	0	3	3
Male	30	>29 yr	married	Master's degree or above	>29,999	Govt	Secondary	med	<37 hours	3-5 years	No	Yes	No	No	3	3	3	0	0	3	2	2	3	5	2	4	3	2	7	3	7	1	6	6	6	6	6	6	2	2	1	2	1	2	0	2	0	1	1
Male	27.9	25-29 yr	unmarried	Master's degree or above	21,000-29,999	Govt	Secondary	em	37-48 hours	>5 years	No	Yes	No	No	0	3	2	0	0	2	2	2	4	2	2	1	1	1	3	2	7	7	7	6	3	2	1	3	1	2	1	2	2	2	2	2	2	2	3
Male	25	25-29 yr	unmarried	Bachelor's degree	21,000-29,999	Govt	Primary	med	<37 hours	3-5 years	No	Yes	No	No	0	0	1	0	0	1	2	2	2	2	2	2	2	2	3	3	3	3	5	3	3	3	3	3	1	1	0	0	0	0	1	0	1	4	3
Male	26	25-29 yr	unmarried	Bachelor's degree	>29,999	Private	Secondary	criti	>48 hours	3-5 years	No	Yes	No	No	3	3	3	0	0	2	1	5	1	1	1	1	1	1	1	2	1	4	6	6	3	4	3	5	3	1	1	0	0	0	0	0	0	4	4
Male	22	<25 yr	married	Diploma degree	21,000-29,999	Private	Tertiary	surg	<37 hours	<3 years	Yes	Yes	No	Yes	0	0	0	0	0	1	1	1	1	1	3	1	1	4	4	1	3	1	3	4	1	1	1	3	3	0	0	0	0	0	0	1	1	3	4
Male	28	25-29 yr	married	Bachelor's degree	21,000-29,999	Govt	Tertiary	em	37-48 hours	3-5 years	No	Yes	No	No	1	1	1	0	1	2	1	2	2	2	2	2	2	2	7	4	2	1	1	2	4	3	3	3	2	2	0	0	0	1	0	1	0	4	5
Male	27.9	25-29 yr	unmarried	Bachelor's degree	21,000-29,999	Govt	Tertiary	surg	<37 hours	3-5 years	No	Yes	No	No	0	2	0	0	0	4	4	4	5	4	5	3	5	4	7	7	6	6	6	6	4	6	6	4	0	3	3	3	2	2	2	2	1	1	1
Male	38	>29 yr	married	Bachelor's degree	>29,999	Govt	Tertiary	criti	37-48 hours	>5 years	No	Yes	No	No	1	2	1	0	0	3	3	2	2	2	2	2	2	3	3	3	3	3	2	3	3	1	1	1	1	1	1	1	1	2	2	2	0	4	4
Male	25.3	25-29 yr	unmarried	Diploma degree	<21,000	Private	Tertiary	surg	>48 hours	3-5 years	Yes	Yes	No	No	0	1	0	0	0	2	2	1	1	1	1	2	2	1	2	3	1	1	1	3	1	1	1	1	3	0	0	0	0	0	0	0	0	5	5
Male	30.4	>29 yr	married	Diploma degree	21,000-29,999	Govt	Tertiary	criti	<37 hours	>5 years	No	Yes	No	No	1	1	0	0	0	2	2	2	2	2	2	2	2	2	5	3	4	2	2	2	4	2	3	3	1	1	2	2	1	1	1	1	1	2	4
Male	26	25-29 yr	unmarried	Diploma degree	<21,000	Private	Secondary	criti	37-48 hours	<3 years	No	No	No	No	0	0	0	0	0	1	4	1	2	2	2	2	4	2	4	4	1	6	1	6	4	4	5	1	3	0	0	0	2	0	0	0	0	5	5
Male	26	25-29 yr	married	Bachelor's degree	<21,000	Private	Tertiary	em	37-48 hours	3-5 years	Yes	Yes	Yes	No	0	0	0	0	0	1	2	2	1	1	2	1	2	1	4	3	3	1	2	3	3	2	4	1	2	1	2	1	1	1	1	1	1	1	3
Male	26.3	25-29 yr	unmarried	Bachelor's degree	<21,000	Private	Tertiary	surg	<37 hours	3-5 years	Yes	Yes	No	No	0	0	0	0	0	1	1	1	1	1	2	2	1	1	5	5	5	4	4	4	4	4	1	1	1	1	0	1	3	1	3	1	1	3	3
Male	28	25-29 yr	unmarried	Diploma degree	21,000-29,999	Govt	Tertiary	em	<37 hours	3-5 years	No	Yes	No	No	0	0	0	0	0	2	1	2	2	2	2	1	2	2	7	5	5	2	2	4	3	3	3	4	0	0	1	0	0	1	1	1	0	5	4
Male	28.8	25-29 yr	unmarried	Bachelor's degree	<21,000	Private	Tertiary	gyn	<37 hours	3-5 years	No	No	No	No	3	3	3	2	2	2	5	3	5	5	5	5	5	2	6	5	5	7	7	7	6	7	7	5	2	2	1	1	0	1	3	3	1	3	4
Male	25	25-29 yr	unmarried	Diploma degree	21,000-29,999	Private	Primary	criti	<37 hours	<3 years	Yes	Yes	No	No	0	1	1	0	0	2	2	2	2	1	3	2	2	2	4	3	3	4	4	4	4	4	3	4	2	3	2	2	2	2	3	2	2	3	4
Male	24.5	<25 yr	unmarried	Master's degree or above	<21,000	Private	Tertiary	surg	37-48 hours	<3 years	No	Yes	No	No	0	0	0	0	0	1	1	1	1	1	1	1	1	1	4	2	5	4	2	4	2	1	4	1	2	0	0	3	0	0	1	0	0	4	4
Male	26.3	25-29 yr	married	Bachelor's degree	>29,999	Private	Primary	med	37-48 hours	<3 years	Yes	Yes	No	Yes	0	0	0	0	0	2	1	1	1	2	1	1	1	1	4	4	3	1	1	1	1	1	4	1	3	0	1	0	3	0	0	0	0	4	4
Male	21.5	<25 yr	unmarried	Diploma degree	<21,000	Private	Tertiary	med	37-48 hours	<3 years	No	Yes	No	No	0	3	2	0	0	1	1	1	1	1	1	1	1	1	2	1
Male	28.6	25-29 yr	married	Diploma degree	21,000-29,999	Govt	Tertiary	med	<37 hours	<3 years	Yes	Yes	Yes	No	2	2	1	3	0	1	2	1	1	2	2	2	1	1	3	2	1	1	1	2	2	1	1	1	3	0	2	0	2	0	0	2	0	3	3
Male	28	25-29 yr	married	Master's degree or above	21,000-29,999	Govt	Tertiary	criti	37-48 hours	>5 years	Yes	Yes	Yes	Yes	0	0	3	0	0	1	1	1	1	1	1	1	1	1	3	4	1	1	4	2	1	1	4	1	3	0	0	0	0	0	0	0	0	4	3
Male	29	25-29 yr	unmarried	Bachelor's degree	21,000-29,999	Govt	Tertiary	med	<37 hours	<3 years	No	Yes	No	No	0	0	0	0	0	1	1	1	2	2	2	2	2	2	2	2	2	2	2	2	2	1	1	2	3	2	0	0	0	0	0	0	0	4	4
Male	31	>29 yr	married	Bachelor's degree	>29,999	Govt	Tertiary	em	37-48 hours	>5 years	No	Yes	No	No	0	1	0	0	0	2	2	3	3	4	3	2	2	3	5	3	2	1	3	3	4	2	3	2	0	1	0	0	0	0	0	0	0	4	4
Male	26	25-29 yr	married	Master's degree or above	21,000-29,999	Govt	Tertiary	surg	37-48 hours	3-5 years	No	Yes	No	Yes	0	0	0	0	0	2	3	3	1	1	2	1	1	1	1	1	1	1	1	1	2	1	1	1	3	0	0	0	0	1	0	0	0	4	5
Male	26.2	25-29 yr	unmarried	Bachelor's degree	<21,000	Private	Tertiary	med	37-48 hours	<3 years	No	Yes	No	No	0	3	2	0	0	1	1	1	4	4	3	1	1	2	3	2	1	1	1	1	4	1	4	1	3	1	1	2	1	0	3	0	0	2	3
Male	25	25-29 yr	married	Bachelor's degree	21,000-29,999	Govt	Tertiary	med	<37 hours	<3 years	No	Yes	No	No	0	1	0	0	0	1	2	2	2	1	2	1	1	1	3	1	3	1	1	4	3	1	4	1	1	0	1	1	0	1	0	0	0	4	4
Male	30	>29 yr	married	Master's degree or above	>29,999	Govt	Tertiary	em	37-48 hours	>5 years	No	Yes	Yes	No	0	1	1	0	0	2	2	1	1	1	1	1	2	1	1	1	1	2	1	1	1	1	1	1	0	0	0	0	0	0	0	0	0	3	2
Male	31	>29 yr	married	Master's degree or above	21,000-29,999	Govt	Primary	general	<37 hours	>5 years	Yes	Yes	No	Yes	0	0	0	0	0	2	3	3	3	2	2	2	2	2	2	2	2	1	2	2	2	2	2	2	1	1	1	1	1	1	1	1	1	4	4
Male	28.7	25-29 yr	married	Bachelor's degree	21,000-29,999	Govt	Tertiary	criti	<37 hours	3-5 years	No	Yes	No	No	1	3	1	0	0	2	1	2	1	2	2	2	2	1	5	4	6	1	4	4	3	4	2	1	2	1	2	1	1	1	0	0	0	4	4
Male	23	<25 yr	unmarried	Bachelor's degree	<21,000	Private	Tertiary	surg	<37 hours	3-5 years	Yes	Yes	No	Yes	0	0	0	0	0	1	1	1	2	1	1	1	1	1	1	1	1	1	1	1	1	1	1	1	1	0	0	0	0	0	0	0	0	1	1
Male	27.3	25-29 yr	married	Master's degree or above	21,000-29,999	Govt	Tertiary	surg	<37 hours	3-5 years	No	Yes	No	No	0	3	3	0	0	3	5	5	5	2	2	4	2	2	4	6	5	4	4	4	3	4	3	7	1	3	1	1	1	2	0	0	1	2	2
Male	33	>29 yr	unmarried	Diploma degree	>29,999	Govt	Tertiary	surg	<37 hours	3-5 years	No	Yes	No	No	1	1	0	0	0	1	2	2	1	2	2	2	2	1	3	3	2	3	3	1	2	4	2	2	0	0	0	0	0	0	0	1	0	1	4
Male	30	>29 yr	married	Master's degree or above	>29,999	Govt	Tertiary	med	<37 hours	>5 years	No	Yes	Yes	Yes	0	0	0	0	0	4	1	1	1	1	4	3	1	1	1	1	1	1	1	1	2	1	7	1	1	0	0	0	0	0	3	3	0	4	4
Male	30	>29 yr	married	Master's degree or above	21,000-29,999	Govt	Tertiary	med	37-48 hours	>5 years	No	Yes	No	No	3	3	3	0	0	5	5	5	5	2	2	5	4	3	4	3	3	4	4	7	4	5	5	4	2	1	3	2	3	3	1	2	1	2	2
Male	27.2	25-29 yr	unmarried	Diploma degree	>29,999	Govt	Secondary	criti	<37 hours	>5 years	Yes	Yes	No	Yes	0	0	0	0	0	1	1	1	1	1	1	1	1	1	3	2	1	1	1	1	3	2	1	1	3	0	0	1	0	1	0	0	0	5	5
Male	23	<25 yr	unmarried	Diploma degree	<21,000	Private	Secondary	criti	>48 hours	<3 years	Yes	No	No	No	0	3	1	0	0	1	1	1	1	1	1	1	1	1	3	3	2	1	1	4	2	1	1	1	3	0	3	3	3	0	3	3	0	1	2
[truncated: 11 more columns]
